# Supplementary material for: The Pliocene Model Intercomparison Project Phase 2: large-scale climate features and climate sensitivity
Source: Copernicus journal article supplement (doi:10.5194/cp-16-2095-2020), 2020-11-04
Supplement: Supplementary file 1 [file cp-16-2095-2020-supplement.zip]

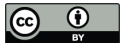

## *Supplement of*

# **The Pliocene Model Intercomparison Project Phase 2: large-scale climate features and climate sensitivity**

**Alan M. Haywood et al.**

*Correspondence to:* Julia C. Tindall ([earjcti@leeds.ac.uk](mailto:earjcti@leeds.ac.uk))

- [cp-16-2095-2020-supplement-title-page.pdf](#)
- Supplementary
  - [data\\_for\\_1a\\_1c\\_3a.txt](#)
  - [data\\_for\\_1b\\_1d.nc](#)
  - [data\\_for\\_3b\\_3c\\_3d.txt](#)
  - [data\\_for\\_5a\\_6a.txt](#)
  - [data\\_for\\_5b\\_5c.nc](#)
  - [data\\_for\\_6b.txt](#)
  - [data\\_for\\_7a-b.txt](#)
  - [data\\_for\\_7c.nc](#)
  - [data\\_for\\_fig2.nc](#)
  - [data\\_for\\_fig4.nc](#)
  - [data\\_for\\_supp\\_fig2\\_.txt](#)
  - [data\\_for\\_supp\\_fig2\\_Land.txt](#)
  - [data\\_for\\_supp\\_fig2\\_Ocean.txt](#)
  - [data\\_for\\_supp\\_fig7.txt](#)
  - [fig8\\_cs\\_mp\\_sst\\_data\\_30k\\_plus\\_NOAA.csv](#)
  - [fig8\\_modeloutput\\_CSCD\\_localities\\_Apr\\_2020.xls](#)
  - [figure9.txt](#)
  - [supplementary\\_figures.pdf](#)

The copyright of individual parts of the supplement might differ from the CC BY 4.0 License.
