# Supplementary material for: The Pliocene Model Intercomparison Project Phase 2: large-scale climate features and climate sensitivity
Source: Copernicus journal article supplement (doi:10.5194/cp-16-2095-2020), 2020-11-04
Supplement: Supplementary file 2 [file cp-16-2095-2020-supplement.zip]

Archive with 20 entries (19 files):
- Supplementary/
- Supplementary/data_for_supp_fig2_Ocean.txt
- Supplementary/data_for_1a_1c_3a.txt
- Supplementary/data_for_supp_fig7.txt
- Supplementary/fig8_cs_mp_sst_data_30k_plus_NOAA.csv
- Supplementary/data_for_3b_3c_3d.txt
- Supplementary/data_for_7a-b.txt
- Supplementary/figure9.txt
- Supplementary/data_for_supp_fig2_.txt
- Supplementary/data_for_6b.txt
- Supplementary/data_for_7c.nc
- Supplementary/fig8_modeloutput_CSCD_localities_Apr_2020.xls
- Supplementary/data_for_5a_6a.txt
- Supplementary/data_for_fig4.nc
- Supplementary/data_for_supp_fig2_Land.txt
- Supplementary/supplementary_figures.pdf
- Supplementary/data_for_fig2.nc
- Supplementary/data_for_1b_1d.nc
- Supplementary/data_for_5b_5c.nc
- cp-16-2095-2020-supplement-title-page.pdf
