# Supplementary material for: The Pliocene Model Intercomparison Project Phase 2: large-scale climate features and climate sensitivity
Source: Copernicus journal article supplement (doi:10.5194/cp-16-2095-2020), 2020-11-04
Supplement: Supplementary file 2 [file cp-16-2095-2020-supplement.zip › Supplementary/data_for_1a_1c_3a.txt]

data_for_1a 
modelname, Pliocore_global_mean, pliocore_global_mean_2sigma, picntl_global_mean, picntl_global_mean_2sigma 
CESM2,19.31,0.21,14.14,0.2
IPSLCM6A,16.02,0.23,12.54,0.25
COSMOS,16.83,0.48,13.5,0.46
EC-Earth3.3,18.17,0.15,13.33,0.19
CESM1.2,17.33,0.17,13.3,0.21
IPSLCM5A,14.38,0.22,12.09,0.27
MIROC4m,15.91,0.18,12.77,0.22
IPSLCM5A2,15.33,0.27,13.16,0.34
HadCM3,16.95,0.2,14.06,0.21
GISS2.1G,15.91,0.31,13.78,0.27
CCSM4,15.98,0.15,13.37,0.19
CCSM4-Utr,18.52,0.13,13.78,0.27
CCSM4-UoT,16.8,0.13,13.01,0.21
NorESM-L,14.57,0.13,12.48,0.14
MRI2.3,15.12,0.26,12.67,0.2
NorESM1-F,16.22,0.15,14.49,0.14

data_for_3a 
modelname, Jan, Feb, Mar, Apr, May, Jun, Jul, Aug, Sep, Oct, Nov, Dec 
CESM2,5.39,5.22,5.18,5.09,5.07,5.54,5.94,5.93,5.52,5.09,5.13,5.27
IPSLCM6A,3.73,3.61,3.57,3.31,3.24,3.49,3.6,3.79,3.87,3.86,4.03,3.96
COSMOS,4.1,3.95,3.88,3.52,3.43,3.58,3.72,3.69,3.64,3.79,3.99,3.99
EC-Earth3.3,5.49,5.37,5.32,5.29,5.34,5.63,5.87,6.22,6.31,6.42,6.26,5.9
CESM1.2,4.04,3.82,4.05,4.25,4.3,4.36,4.31,4.35,4.22,4.12,4.19,4.2
IPSLCM5A,2.63,2.55,2.43,2.46,2.59,2.8,2.93,3.12,3.25,3.23,3.01,2.83
MIROC4m,3.05,2.99,3.33,3.76,3.76,3.9,3.9,3.84,3.58,3.42,3.32,3.18
IPSLCM5A2,2.41,2.32,2.26,2.17,2.16,2.49,2.59,2.78,2.82,2.81,2.64,2.51
HadCM3,2.78,2.87,3.0,3.03,3.22,3.71,4.26,4.23,3.66,3.16,2.91,2.93
GISS2.1G,2.24,2.08,2.01,1.73,1.61,1.49,1.52,1.39,1.39,1.67,2.02,2.28
CCSM4,2.03,2.11,2.64,2.88,3.03,3.33,3.17,2.99,2.83,2.7,2.51,2.25
CCSM4-Utr,4.31,4.29,4.53,4.72,4.56,4.65,4.72,4.79,4.89,4.9,4.97,4.73
CCSM4-UoT,3.23,3.39,3.78,4.08,4.23,4.76,4.7,4.42,4.21,4.16,3.95,3.45
NorESM-L,1.7,1.66,1.74,1.83,1.76,1.65,1.75,1.85,1.91,2.02,1.93,1.64
MRI2.3,4.33,4.19,3.67,3.15,2.57,1.97,1.75,1.84,2.3,3.02,3.73,4.27
NorESM1-F,1.8,1.74,1.74,1.94,1.79,1.71,1.84,1.97,2.03,2.15,2.22,1.95

data_for_1c 
CESM2
latitude, Tanom 
-89.5,7.06
-88.5,6.52
-87.5,6.04
-86.5,5.72
-85.5,6.44
-84.5,7.06
-83.5,8.48
-82.5,9.66
-81.5,10.29
-80.5,11.42
-79.5,11.78
-78.5,11.77
-77.5,11.88
-76.5,12.24
-75.5,12.58
-74.5,12.97
-73.5,13.65
-72.5,14.33
-71.5,14.4
-70.5,14.25
-69.5,13.87
-68.5,12.86
-67.5,11.71
-66.5,10.93
-65.5,10.53
-64.5,9.81
-63.5,8.78
-62.5,7.81
-61.5,7.07
-60.5,6.5
-59.5,6.07
-58.5,5.76
-57.5,5.52
-56.5,5.35
-55.5,5.23
-54.5,5.14
-53.5,5.06
-52.5,4.98
-51.5,4.92
-50.5,4.86
-49.5,4.84
-48.5,4.81
-47.5,4.78
-46.5,4.73
-45.5,4.68
-44.5,4.61
-43.5,4.54
-42.5,4.46
-41.5,4.41
-40.5,4.35
-39.5,4.3
-38.5,4.24
-37.5,4.18
-36.5,4.11
-35.5,4.04
-34.5,3.99
-33.5,3.95
-32.5,3.91
-31.5,3.88
-30.5,3.86
-29.5,3.88
-28.5,3.88
-27.5,3.85
-26.5,3.86
-25.5,3.83
-24.5,3.78
-23.5,3.77
-22.5,3.76
-21.5,3.75
-20.5,3.75
-19.5,3.74
-18.5,3.72
-17.5,3.72
-16.5,3.7
-15.5,3.74
-14.5,3.77
-13.5,3.68
-12.5,3.65
-11.5,3.58
-10.5,3.59
-9.5,3.6
-8.5,3.61
-7.5,3.65
-6.5,3.65
-5.5,3.67
-4.5,3.72
-3.5,3.81
-2.5,3.82
-1.5,3.83
-0.5,3.79
0.5,3.79
1.5,3.78
2.5,3.72
3.5,3.64
4.5,3.54
5.5,3.47
6.5,3.44
7.5,3.43
8.5,3.44
9.5,3.49
10.5,3.5
11.5,3.51
12.5,3.56
13.5,3.66
14.5,3.74
15.5,3.85
16.5,3.93
17.5,4.04
18.5,4.06
19.5,4.05
20.5,3.99
21.5,3.92
22.5,3.91
23.5,3.91
24.5,3.94
25.5,3.97
26.5,4.09
27.5,4.22
28.5,4.3
29.5,4.38
30.5,4.45
31.5,4.46
32.5,4.53
33.5,4.58
34.5,4.69
35.5,4.71
36.5,4.76
37.5,4.9
38.5,5.03
39.5,5.16
40.5,5.31
41.5,5.43
42.5,5.53
43.5,5.63
44.5,5.77
45.5,5.9
46.5,5.96
47.5,6.02
48.5,6.1
49.5,6.21
50.5,6.29
51.5,6.39
52.5,6.49
53.5,6.58
54.5,6.72
55.5,6.83
56.5,6.92
57.5,6.97
58.5,7.03
59.5,7.16
60.5,7.38
61.5,7.68
62.5,7.99
63.5,8.34
64.5,8.78
65.5,9.17
66.5,9.59
67.5,9.92
68.5,10.27
69.5,10.6
70.5,10.99
71.5,11.39
72.5,11.76
73.5,12.01
74.5,12.19
75.5,12.47
76.5,12.79
77.5,13.08
78.5,13.2
79.5,13.27
80.5,13.32
81.5,13.46
82.5,13.7
83.5,13.79
84.5,13.78
85.5,13.75
86.5,13.72
87.5,13.7
88.5,13.69
89.5,13.71
IPSLCM6A
latitude, Tanom 
-89.5,3.57
-88.5,2.41
-87.5,1.18
-86.5,2.32
-85.5,3.82
-84.5,5.13
-83.5,5.91
-82.5,6.11
-81.5,6.99
-80.5,7.75
-79.5,8.3
-78.5,8.7
-77.5,8.97
-76.5,9.1
-75.5,9.35
-74.5,9.84
-73.5,10.62
-72.5,11.11
-71.5,11.06
-70.5,10.99
-69.5,10.9
-68.5,10.31
-67.5,9.63
-66.5,9.26
-65.5,9.06
-64.5,8.83
-63.5,8.19
-62.5,7.47
-61.5,6.8
-60.5,6.2
-59.5,5.64
-58.5,5.14
-57.5,4.72
-56.5,4.34
-55.5,4.03
-54.5,3.81
-53.5,3.6
-52.5,3.45
-51.5,3.31
-50.5,3.18
-49.5,3.09
-48.5,2.99
-47.5,2.92
-46.5,2.85
-45.5,2.79
-44.5,2.73
-43.5,2.68
-42.5,2.63
-41.5,2.54
-40.5,2.42
-39.5,2.3
-38.5,2.24
-37.5,2.17
-36.5,2.11
-35.5,2.09
-34.5,2.1
-33.5,2.1
-32.5,2.08
-31.5,2.08
-30.5,2.03
-29.5,2.0
-28.5,1.97
-27.5,1.94
-26.5,1.93
-25.5,1.93
-24.5,1.93
-23.5,1.95
-22.5,1.96
-21.5,1.94
-20.5,1.96
-19.5,1.95
-18.5,1.97
-17.5,2.02
-16.5,2.05
-15.5,2.08
-14.5,2.12
-13.5,2.15
-12.5,2.18
-11.5,2.19
-10.5,2.23
-9.5,2.28
-8.5,2.31
-7.5,2.32
-6.5,2.35
-5.5,2.37
-4.5,2.39
-3.5,2.4
-2.5,2.38
-1.5,2.4
-0.5,2.37
0.5,2.36
1.5,2.35
2.5,2.33
3.5,2.31
4.5,2.3
5.5,2.29
6.5,2.27
7.5,2.25
8.5,2.28
9.5,2.32
10.5,2.33
11.5,2.26
12.5,2.25
13.5,2.3
14.5,2.39
15.5,2.47
16.5,2.58
17.5,2.69
18.5,2.73
19.5,2.73
20.5,2.71
21.5,2.67
22.5,2.64
23.5,2.63
24.5,2.63
25.5,2.66
26.5,2.74
27.5,2.85
28.5,2.91
29.5,2.97
30.5,3.05
31.5,3.1
32.5,3.25
33.5,3.38
34.5,3.43
35.5,3.39
36.5,3.47
37.5,3.44
38.5,3.4
39.5,3.45
40.5,3.69
41.5,3.66
42.5,3.64
43.5,3.63
44.5,3.62
45.5,3.71
46.5,3.83
47.5,3.9
48.5,3.91
49.5,3.94
50.5,3.98
51.5,4.05
52.5,4.13
53.5,4.26
54.5,4.48
55.5,4.62
56.5,4.78
57.5,4.9
58.5,4.96
59.5,5.05
60.5,5.17
61.5,5.3
62.5,5.42
63.5,5.61
64.5,6.03
65.5,6.41
66.5,6.65
67.5,6.88
68.5,7.26
69.5,7.59
70.5,8.0
71.5,8.35
72.5,8.63
73.5,8.9
74.5,9.29
75.5,9.85
76.5,10.38
77.5,10.77
78.5,10.87
79.5,10.78
80.5,10.43
81.5,10.12
82.5,10.13
83.5,10.43
84.5,10.67
85.5,10.8
86.5,10.87
87.5,10.96
88.5,10.96
89.5,11.32
COSMOS
latitude, Tanom 
-89.5,7.35
-88.5,7.22
-87.5,7.1
-86.5,6.97
-85.5,6.84
-84.5,6.71
-83.5,6.58
-82.5,7.15
-81.5,7.74
-80.5,8.33
-79.5,8.93
-78.5,9.58
-77.5,10.24
-76.5,10.89
-75.5,10.93
-74.5,10.52
-73.5,10.09
-72.5,9.67
-71.5,8.98
-70.5,8.25
-69.5,7.51
-68.5,6.82
-67.5,6.27
-66.5,5.73
-65.5,5.18
-64.5,4.71
-63.5,4.35
-62.5,3.97
-61.5,3.59
-60.5,3.38
-59.5,3.23
-58.5,3.08
-57.5,2.94
-56.5,2.87
-55.5,2.79
-54.5,2.71
-53.5,2.61
-52.5,2.47
-51.5,2.34
-50.5,2.2
-49.5,2.06
-48.5,1.93
-47.5,1.79
-46.5,1.66
-45.5,1.65
-44.5,1.65
-43.5,1.66
-42.5,1.66
-41.5,1.69
-40.5,1.71
-39.5,1.73
-38.5,1.74
-37.5,1.73
-36.5,1.71
-35.5,1.7
-34.5,1.73
-33.5,1.77
-32.5,1.81
-31.5,1.84
-30.5,1.9
-29.5,1.97
-28.5,2.04
-27.5,2.1
-26.5,2.15
-25.5,2.19
-24.5,2.24
-23.5,2.28
-22.5,2.3
-21.5,2.32
-20.5,2.35
-19.5,2.36
-18.5,2.38
-17.5,2.4
-16.5,2.41
-15.5,2.4
-14.5,2.41
-13.5,2.4
-12.5,2.42
-11.5,2.46
-10.5,2.51
-9.5,2.56
-8.5,2.61
-7.5,2.67
-6.5,2.71
-5.5,2.76
-4.5,2.75
-3.5,2.75
-2.5,2.74
-1.5,2.72
-0.5,2.72
0.5,2.7
1.5,2.69
2.5,2.67
3.5,2.63
4.5,2.59
5.5,2.56
6.5,2.49
7.5,2.42
8.5,2.34
9.5,2.29
10.5,2.28
11.5,2.29
12.5,2.3
13.5,2.38
14.5,2.56
15.5,2.73
16.5,2.9
17.5,2.99
18.5,3.06
19.5,3.13
20.5,3.18
21.5,3.13
22.5,3.07
23.5,3.02
24.5,2.99
25.5,3.03
26.5,3.07
27.5,3.09
28.5,3.19
29.5,3.33
30.5,3.45
31.5,3.59
32.5,3.6
33.5,3.61
34.5,3.62
35.5,3.61
36.5,3.56
37.5,3.51
38.5,3.46
39.5,3.46
40.5,3.49
41.5,3.54
42.5,3.59
43.5,3.67
44.5,3.76
45.5,3.87
46.5,3.96
47.5,4.02
48.5,4.08
49.5,4.14
50.5,4.18
51.5,4.21
52.5,4.24
53.5,4.28
54.5,4.36
55.5,4.46
56.5,4.56
57.5,4.67
58.5,4.81
59.5,4.97
60.5,5.13
61.5,5.3
62.5,5.52
63.5,5.73
64.5,5.95
65.5,6.22
66.5,6.54
67.5,6.86
68.5,7.17
69.5,7.46
70.5,7.74
71.5,8.03
72.5,8.31
73.5,8.52
74.5,8.74
75.5,8.96
76.5,9.15
77.5,9.29
78.5,9.43
79.5,9.57
80.5,9.39
81.5,9.07
82.5,8.76
83.5,8.44
84.5,8.37
85.5,8.31
86.5,8.23
87.5,8.16
88.5,8.09
89.5,8.02
EC-Earth3.3
latitude, Tanom 
-89.5,4.27
-88.5,4.27
-87.5,4.06
-86.5,4.31
-85.5,5.72
-84.5,7.64
-83.5,8.92
-82.5,10.35
-81.5,11.69
-80.5,12.65
-79.5,12.91
-78.5,12.41
-77.5,11.57
-76.5,10.97
-75.5,10.86
-74.5,10.87
-73.5,11.05
-72.5,11.21
-71.5,10.85
-70.5,10.44
-69.5,9.78
-68.5,9.04
-67.5,8.39
-66.5,7.71
-65.5,6.92
-64.5,6.15
-63.5,5.57
-62.5,5.16
-61.5,4.85
-60.5,4.61
-59.5,4.42
-58.5,4.28
-57.5,4.15
-56.5,4.03
-55.5,3.92
-54.5,3.85
-53.5,3.78
-52.5,3.72
-51.5,3.65
-50.5,3.59
-49.5,3.55
-48.5,3.5
-47.5,3.45
-46.5,3.42
-45.5,3.38
-44.5,3.35
-43.5,3.34
-42.5,3.3
-41.5,3.21
-40.5,3.12
-39.5,3.06
-38.5,3.02
-37.5,2.99
-36.5,2.97
-35.5,2.96
-34.5,2.95
-33.5,2.96
-32.5,2.98
-31.5,2.98
-30.5,2.99
-29.5,2.97
-28.5,2.96
-27.5,2.95
-26.5,2.91
-25.5,2.89
-24.5,2.9
-23.5,2.9
-22.5,2.89
-21.5,2.89
-20.5,2.92
-19.5,2.94
-18.5,2.93
-17.5,2.95
-16.5,2.96
-15.5,2.99
-14.5,3.01
-13.5,3.02
-12.5,3.05
-11.5,3.08
-10.5,3.12
-9.5,3.15
-8.5,3.19
-7.5,3.18
-6.5,3.19
-5.5,3.24
-4.5,3.28
-3.5,3.32
-2.5,3.36
-1.5,3.35
-0.5,3.35
0.5,3.33
1.5,3.27
2.5,3.22
3.5,3.17
4.5,3.14
5.5,3.1
6.5,3.06
7.5,3.03
8.5,2.96
9.5,2.88
10.5,2.78
11.5,2.82
12.5,2.85
13.5,2.94
14.5,3.11
15.5,3.31
16.5,3.54
17.5,3.71
18.5,3.84
19.5,3.99
20.5,4.09
21.5,4.2
22.5,4.33
23.5,4.47
24.5,4.62
25.5,4.78
26.5,4.94
27.5,5.09
28.5,5.18
29.5,5.21
30.5,5.23
31.5,5.25
32.5,5.31
33.5,5.4
34.5,5.49
35.5,5.54
36.5,5.6
37.5,5.65
38.5,5.81
39.5,5.97
40.5,6.21
41.5,6.4
42.5,6.55
43.5,6.81
44.5,7.05
45.5,7.13
46.5,7.17
47.5,7.22
48.5,7.21
49.5,7.3
50.5,7.41
51.5,7.52
52.5,7.65
53.5,7.82
54.5,7.97
55.5,8.03
56.5,8.13
57.5,8.24
58.5,8.31
59.5,8.5
60.5,8.76
61.5,8.98
62.5,9.21
63.5,9.61
64.5,10.08
65.5,10.36
66.5,10.92
67.5,11.22
68.5,11.4
69.5,11.68
70.5,12.16
71.5,12.78
72.5,13.27
73.5,13.31
74.5,13.48
75.5,13.72
76.5,13.4
77.5,13.11
78.5,12.94
79.5,12.78
80.5,12.73
81.5,12.8
82.5,12.41
83.5,12.04
84.5,12.02
85.5,11.93
86.5,11.78
87.5,11.6
88.5,11.46
89.5,11.35
CESM1.2
latitude, Tanom 
-89.5,1.11
-88.5,2.61
-87.5,3.43
-86.5,3.92
-85.5,4.56
-84.5,5.16
-83.5,7.26
-82.5,8.73
-81.5,8.73
-80.5,9.49
-79.5,9.15
-78.5,8.79
-77.5,8.62
-76.5,8.75
-75.5,9.17
-74.5,9.88
-73.5,10.89
-72.5,12.03
-71.5,12.55
-70.5,12.73
-69.5,12.3
-68.5,11.26
-67.5,10.4
-66.5,9.85
-65.5,9.72
-64.5,9.39
-63.5,8.62
-62.5,7.74
-61.5,6.91
-60.5,6.2
-59.5,5.66
-58.5,5.25
-57.5,4.94
-56.5,4.68
-55.5,4.5
-54.5,4.38
-53.5,4.27
-52.5,4.18
-51.5,4.11
-50.5,4.06
-49.5,4.03
-48.5,4.0
-47.5,3.94
-46.5,3.88
-45.5,3.82
-44.5,3.73
-43.5,3.64
-42.5,3.54
-41.5,3.45
-40.5,3.37
-39.5,3.3
-38.5,3.22
-37.5,3.14
-36.5,3.07
-35.5,3.0
-34.5,2.95
-33.5,2.9
-32.5,2.87
-31.5,2.81
-30.5,2.77
-29.5,2.74
-28.5,2.71
-27.5,2.68
-26.5,2.65
-25.5,2.6
-24.5,2.58
-23.5,2.59
-22.5,2.58
-21.5,2.54
-20.5,2.5
-19.5,2.49
-18.5,2.48
-17.5,2.49
-16.5,2.5
-15.5,2.54
-14.5,2.56
-13.5,2.54
-12.5,2.52
-11.5,2.51
-10.5,2.5
-9.5,2.49
-8.5,2.5
-7.5,2.52
-6.5,2.54
-5.5,2.58
-4.5,2.63
-3.5,2.69
-2.5,2.71
-1.5,2.7
-0.5,2.69
0.5,2.63
1.5,2.61
2.5,2.53
3.5,2.49
4.5,2.45
5.5,2.46
6.5,2.46
7.5,2.4
8.5,2.38
9.5,2.34
10.5,2.31
11.5,2.3
12.5,2.36
13.5,2.43
14.5,2.51
15.5,2.62
16.5,2.71
17.5,2.81
18.5,2.81
19.5,2.84
20.5,2.84
21.5,2.85
22.5,2.89
23.5,2.93
24.5,2.99
25.5,3.04
26.5,3.09
27.5,3.16
28.5,3.25
29.5,3.29
30.5,3.37
31.5,3.42
32.5,3.44
33.5,3.44
34.5,3.51
35.5,3.51
36.5,3.52
37.5,3.64
38.5,3.75
39.5,3.84
40.5,3.98
41.5,4.09
42.5,4.16
43.5,4.23
44.5,4.38
45.5,4.49
46.5,4.52
47.5,4.52
48.5,4.5
49.5,4.52
50.5,4.57
51.5,4.65
52.5,4.71
53.5,4.79
54.5,4.94
55.5,5.07
56.5,5.15
57.5,5.23
58.5,5.31
59.5,5.44
60.5,5.66
61.5,5.94
62.5,6.34
63.5,6.77
64.5,7.39
65.5,7.89
66.5,8.53
67.5,9.04
68.5,9.41
69.5,9.7
70.5,10.12
71.5,10.66
72.5,11.15
73.5,11.52
74.5,11.86
75.5,12.27
76.5,12.75
77.5,13.07
78.5,13.19
79.5,13.39
80.5,13.48
81.5,13.91
82.5,14.42
83.5,14.94
84.5,15.26
85.5,15.43
86.5,15.53
87.5,15.6
88.5,15.64
89.5,15.68
IPSLCM5A
latitude, Tanom 
-89.5,-0.51
-88.5,-0.44
-87.5,-0.22
-86.5,0.11
-85.5,1.22
-84.5,2.67
-83.5,3.41
-82.5,3.99
-81.5,4.5
-80.5,5.0
-79.5,5.28
-78.5,5.55
-77.5,5.76
-76.5,5.94
-75.5,6.05
-74.5,6.19
-73.5,6.36
-72.5,6.43
-71.5,6.37
-70.5,6.03
-69.5,5.47
-68.5,4.84
-67.5,4.16
-66.5,3.55
-65.5,2.94
-64.5,2.71
-63.5,2.53
-62.5,2.3
-61.5,2.07
-60.5,1.88
-59.5,1.7
-58.5,1.54
-57.5,1.41
-56.5,1.33
-55.5,1.26
-54.5,1.22
-53.5,1.19
-52.5,1.16
-51.5,1.15
-50.5,1.15
-49.5,1.16
-48.5,1.16
-47.5,1.19
-46.5,1.2
-45.5,1.24
-44.5,1.28
-43.5,1.32
-42.5,1.36
-41.5,1.4
-40.5,1.43
-39.5,1.42
-38.5,1.39
-37.5,1.34
-36.5,1.31
-35.5,1.28
-34.5,1.27
-33.5,1.26
-32.5,1.25
-31.5,1.24
-30.5,1.23
-29.5,1.23
-28.5,1.23
-27.5,1.22
-26.5,1.23
-25.5,1.24
-24.5,1.27
-23.5,1.29
-22.5,1.3
-21.5,1.32
-20.5,1.35
-19.5,1.38
-18.5,1.43
-17.5,1.45
-16.5,1.49
-15.5,1.5
-14.5,1.5
-13.5,1.53
-12.5,1.57
-11.5,1.57
-10.5,1.56
-9.5,1.61
-8.5,1.68
-7.5,1.69
-6.5,1.7
-5.5,1.72
-4.5,1.73
-3.5,1.75
-2.5,1.75
-1.5,1.75
-0.5,1.74
0.5,1.71
1.5,1.71
2.5,1.72
3.5,1.71
4.5,1.7
5.5,1.7
6.5,1.72
7.5,1.74
8.5,1.77
9.5,1.83
10.5,1.87
11.5,1.83
12.5,1.82
13.5,1.94
14.5,2.04
15.5,2.08
16.5,2.13
17.5,2.2
18.5,2.25
19.5,2.26
20.5,2.26
21.5,2.24
22.5,2.24
23.5,2.25
24.5,2.28
25.5,2.32
26.5,2.37
27.5,2.42
28.5,2.48
29.5,2.54
30.5,2.61
31.5,2.68
32.5,2.75
33.5,2.83
34.5,2.93
35.5,3.04
36.5,3.13
37.5,3.15
38.5,3.13
39.5,3.18
40.5,3.27
41.5,3.25
42.5,3.17
43.5,3.09
44.5,3.01
45.5,2.96
46.5,2.9
47.5,2.91
48.5,2.92
49.5,2.88
50.5,2.87
51.5,2.89
52.5,2.95
53.5,3.03
54.5,3.14
55.5,3.25
56.5,3.35
57.5,3.43
58.5,3.51
59.5,3.58
60.5,3.71
61.5,3.84
62.5,4.01
63.5,4.18
64.5,4.51
65.5,4.81
66.5,5.04
67.5,5.27
68.5,5.5
69.5,5.73
70.5,5.99
71.5,6.17
72.5,6.31
73.5,6.41
74.5,6.48
75.5,6.5
76.5,6.48
77.5,6.34
78.5,6.15
79.5,5.74
80.5,5.29
81.5,4.98
82.5,4.7
83.5,4.67
84.5,4.64
85.5,4.7
86.5,4.73
87.5,4.75
88.5,4.76
89.5,4.76
MIROC4m
latitude, Tanom 
-89.5,0.85
-88.5,1.59
-87.5,2.34
-86.5,3.09
-85.5,3.83
-84.5,4.53
-83.5,5.21
-82.5,5.88
-81.5,6.47
-80.5,7.03
-79.5,7.59
-78.5,7.97
-77.5,8.35
-76.5,8.65
-75.5,8.68
-74.5,8.7
-73.5,8.63
-72.5,8.43
-71.5,8.25
-70.5,7.99
-69.5,7.71
-68.5,7.42
-67.5,6.91
-66.5,6.36
-65.5,5.82
-64.5,5.32
-63.5,4.82
-62.5,4.35
-61.5,3.95
-60.5,3.56
-59.5,3.24
-58.5,3.02
-57.5,2.79
-56.5,2.65
-55.5,2.54
-54.5,2.43
-53.5,2.38
-52.5,2.32
-51.5,2.28
-50.5,2.23
-49.5,2.19
-48.5,2.14
-47.5,2.1
-46.5,2.05
-45.5,1.99
-44.5,1.94
-43.5,1.89
-42.5,1.83
-41.5,1.79
-40.5,1.74
-39.5,1.71
-38.5,1.7
-37.5,1.68
-36.5,1.71
-35.5,1.75
-34.5,1.78
-33.5,1.81
-32.5,1.84
-31.5,1.87
-30.5,1.89
-29.5,1.92
-28.5,1.97
-27.5,2.02
-26.5,2.08
-25.5,2.15
-24.5,2.22
-23.5,2.28
-22.5,2.31
-21.5,2.35
-20.5,2.37
-19.5,2.4
-18.5,2.43
-17.5,2.43
-16.5,2.44
-15.5,2.43
-14.5,2.41
-13.5,2.39
-12.5,2.36
-11.5,2.33
-10.5,2.31
-9.5,2.29
-8.5,2.3
-7.5,2.31
-6.5,2.32
-5.5,2.32
-4.5,2.32
-3.5,2.33
-2.5,2.35
-1.5,2.35
-0.5,2.37
0.5,2.38
1.5,2.38
2.5,2.32
3.5,2.26
4.5,2.22
5.5,2.19
6.5,2.17
7.5,2.16
8.5,2.19
9.5,2.2
10.5,2.19
11.5,2.17
12.5,2.15
13.5,2.18
14.5,2.23
15.5,2.3
16.5,2.42
17.5,2.54
18.5,2.64
19.5,2.69
20.5,2.75
21.5,2.77
22.5,2.77
23.5,2.76
24.5,2.79
25.5,2.86
26.5,2.91
27.5,2.99
28.5,3.07
29.5,3.14
30.5,3.21
31.5,3.27
32.5,3.31
33.5,3.32
34.5,3.33
35.5,3.34
36.5,3.32
37.5,3.31
38.5,3.33
39.5,3.38
40.5,3.42
41.5,3.43
42.5,3.43
43.5,3.43
44.5,3.43
45.5,3.42
46.5,3.41
47.5,3.41
48.5,3.4
49.5,3.46
50.5,3.57
51.5,3.68
52.5,3.82
53.5,3.95
54.5,4.09
55.5,4.26
56.5,4.44
57.5,4.63
58.5,4.87
59.5,5.1
60.5,5.3
61.5,5.47
62.5,5.64
63.5,5.87
64.5,6.13
65.5,6.39
66.5,6.7
67.5,7.02
68.5,7.33
69.5,7.58
70.5,7.84
71.5,8.03
72.5,8.12
73.5,8.2
74.5,8.27
75.5,8.32
76.5,8.37
77.5,8.35
78.5,8.31
79.5,8.28
80.5,8.12
81.5,7.96
82.5,7.79
83.5,7.58
84.5,7.37
85.5,7.22
86.5,7.14
87.5,7.06
88.5,6.98
89.5,6.91
IPSLCM5A2
latitude, Tanom 
-89.5,-0.5
-88.5,-0.44
-87.5,-0.2
-86.5,0.14
-85.5,1.21
-84.5,2.59
-83.5,3.24
-82.5,3.73
-81.5,4.21
-80.5,4.68
-79.5,4.96
-78.5,5.22
-77.5,5.44
-76.5,5.65
-75.5,5.87
-74.5,6.1
-73.5,6.33
-72.5,6.41
-71.5,6.3
-70.5,5.99
-69.5,5.51
-68.5,4.99
-67.5,4.46
-66.5,4.07
-65.5,3.72
-64.5,3.54
-63.5,3.38
-62.5,3.01
-61.5,2.64
-60.5,2.34
-59.5,2.05
-58.5,1.84
-57.5,1.65
-56.5,1.52
-55.5,1.41
-54.5,1.36
-53.5,1.31
-52.5,1.27
-51.5,1.24
-50.5,1.24
-49.5,1.24
-48.5,1.25
-47.5,1.26
-46.5,1.28
-45.5,1.33
-44.5,1.37
-43.5,1.43
-42.5,1.48
-41.5,1.53
-40.5,1.55
-39.5,1.53
-38.5,1.5
-37.5,1.44
-36.5,1.39
-35.5,1.35
-34.5,1.34
-33.5,1.34
-32.5,1.34
-31.5,1.34
-30.5,1.36
-29.5,1.36
-28.5,1.35
-27.5,1.35
-26.5,1.35
-25.5,1.35
-24.5,1.37
-23.5,1.39
-22.5,1.39
-21.5,1.39
-20.5,1.4
-19.5,1.41
-18.5,1.41
-17.5,1.43
-16.5,1.49
-15.5,1.53
-14.5,1.54
-13.5,1.55
-12.5,1.57
-11.5,1.56
-10.5,1.54
-9.5,1.56
-8.5,1.58
-7.5,1.57
-6.5,1.57
-5.5,1.56
-4.5,1.56
-3.5,1.58
-2.5,1.59
-1.5,1.6
-0.5,1.6
0.5,1.59
1.5,1.58
2.5,1.59
3.5,1.57
4.5,1.53
5.5,1.55
6.5,1.58
7.5,1.64
8.5,1.69
9.5,1.7
10.5,1.71
11.5,1.64
12.5,1.59
13.5,1.66
14.5,1.72
15.5,1.79
16.5,1.86
17.5,1.93
18.5,1.97
19.5,1.98
20.5,1.96
21.5,1.93
22.5,1.92
23.5,1.9
24.5,1.93
25.5,1.96
26.5,2.01
27.5,2.05
28.5,2.11
29.5,2.17
30.5,2.2
31.5,2.23
32.5,2.28
33.5,2.36
34.5,2.49
35.5,2.59
36.5,2.63
37.5,2.64
38.5,2.6
39.5,2.67
40.5,2.79
41.5,2.81
42.5,2.8
43.5,2.71
44.5,2.62
45.5,2.55
46.5,2.49
47.5,2.5
48.5,2.51
49.5,2.48
50.5,2.46
51.5,2.48
52.5,2.51
53.5,2.58
54.5,2.67
55.5,2.79
56.5,2.89
57.5,2.96
58.5,3.04
59.5,3.13
60.5,3.26
61.5,3.41
62.5,3.6
63.5,3.79
64.5,4.11
65.5,4.43
66.5,4.65
67.5,4.87
68.5,5.12
69.5,5.36
70.5,5.58
71.5,5.74
72.5,5.84
73.5,5.96
74.5,6.11
75.5,6.29
76.5,6.48
77.5,6.41
78.5,6.26
79.5,5.82
80.5,5.33
81.5,5.04
82.5,4.78
83.5,4.75
84.5,4.75
85.5,4.81
86.5,4.87
87.5,4.9
88.5,4.94
89.5,4.99
HadCM3
latitude, Tanom 
-89.5,2.57
-88.5,2.57
-87.5,2.57
-86.5,2.79
-85.5,3.0
-84.5,3.75
-83.5,5.04
-82.5,6.33
-81.5,7.44
-80.5,8.54
-79.5,9.14
-78.5,9.25
-77.5,9.36
-76.5,9.52
-75.5,9.69
-74.5,9.72
-73.5,9.58
-72.5,9.46
-71.5,8.88
-70.5,8.3
-69.5,7.67
-68.5,6.98
-67.5,6.3
-66.5,5.95
-65.5,5.6
-64.5,5.12
-63.5,4.51
-62.5,3.9
-61.5,3.44
-60.5,2.99
-59.5,2.66
-58.5,2.43
-57.5,2.2
-56.5,2.08
-55.5,1.96
-54.5,1.87
-53.5,1.82
-52.5,1.76
-51.5,1.75
-50.5,1.73
-49.5,1.81
-48.5,1.98
-47.5,2.14
-46.5,2.13
-45.5,2.12
-44.5,2.06
-43.5,1.94
-42.5,1.84
-41.5,1.74
-40.5,1.63
-39.5,1.58
-38.5,1.56
-37.5,1.56
-36.5,1.6
-35.5,1.65
-34.5,1.69
-33.5,1.71
-32.5,1.73
-31.5,1.77
-30.5,1.81
-29.5,1.82
-28.5,1.81
-27.5,1.79
-26.5,1.76
-25.5,1.74
-24.5,1.72
-23.5,1.72
-22.5,1.71
-21.5,1.72
-20.5,1.72
-19.5,1.72
-18.5,1.7
-17.5,1.7
-16.5,1.72
-15.5,1.75
-14.5,1.76
-13.5,1.77
-12.5,1.78
-11.5,1.8
-10.5,1.8
-9.5,1.82
-8.5,1.83
-7.5,1.86
-6.5,1.88
-5.5,1.9
-4.5,1.95
-3.5,2.03
-2.5,2.1
-1.5,2.15
-0.5,2.2
0.5,2.19
1.5,2.11
2.5,2.02
3.5,2.04
4.5,2.06
5.5,2.07
6.5,2.08
7.5,2.09
8.5,2.08
9.5,2.08
10.5,2.05
11.5,2.02
12.5,1.97
13.5,2.01
14.5,2.05
15.5,2.14
16.5,2.26
17.5,2.38
18.5,2.46
19.5,2.54
20.5,2.59
21.5,2.64
22.5,2.68
23.5,2.7
24.5,2.72
25.5,2.79
26.5,2.91
27.5,3.03
28.5,3.15
29.5,3.26
30.5,3.37
31.5,3.46
32.5,3.56
33.5,3.61
34.5,3.68
35.5,3.72
36.5,3.74
37.5,3.77
38.5,3.9
39.5,4.04
40.5,4.1
41.5,4.1
42.5,4.09
43.5,4.04
44.5,3.98
45.5,3.97
46.5,4.0
47.5,4.03
48.5,4.0
49.5,3.97
50.5,3.95
51.5,3.98
52.5,4.0
53.5,4.1
54.5,4.2
55.5,4.23
56.5,4.21
57.5,4.18
58.5,4.19
59.5,4.19
60.5,4.19
61.5,4.2
62.5,4.2
63.5,4.37
64.5,4.55
65.5,4.75
66.5,4.93
67.5,5.12
68.5,5.36
69.5,5.59
70.5,5.76
71.5,5.85
72.5,5.96
73.5,5.81
74.5,5.66
75.5,5.6
76.5,5.63
77.5,5.67
78.5,5.72
79.5,5.77
80.5,5.87
81.5,6.02
82.5,6.17
83.5,6.36
84.5,6.55
85.5,6.69
86.5,6.82
87.5,6.94
88.5,6.94
89.5,6.94
GISS2.1G
latitude, Tanom 
-89.5,4.41
-88.5,4.19
-87.5,3.96
-86.5,3.93
-85.5,4.1
-84.5,4.79
-83.5,6.0
-82.5,7.14
-81.5,8.24
-80.5,9.07
-79.5,9.61
-78.5,9.85
-77.5,9.79
-76.5,9.82
-75.5,9.96
-74.5,10.09
-73.5,10.21
-72.5,10.16
-71.5,9.91
-70.5,9.4
-69.5,8.62
-68.5,7.82
-67.5,7.0
-66.5,6.38
-65.5,5.96
-64.5,5.59
-63.5,5.27
-62.5,4.93
-61.5,4.61
-60.5,4.32
-59.5,4.07
-58.5,3.85
-57.5,3.67
-56.5,3.51
-55.5,3.37
-54.5,3.26
-53.5,3.16
-52.5,3.05
-51.5,2.95
-50.5,2.87
-49.5,2.8
-48.5,2.72
-47.5,2.63
-46.5,2.54
-45.5,2.46
-44.5,2.37
-43.5,2.27
-42.5,2.17
-41.5,2.07
-40.5,1.98
-39.5,1.92
-38.5,1.85
-37.5,1.77
-36.5,1.71
-35.5,1.67
-34.5,1.64
-33.5,1.62
-32.5,1.6
-31.5,1.58
-30.5,1.54
-29.5,1.49
-28.5,1.47
-27.5,1.44
-26.5,1.43
-25.5,1.41
-24.5,1.4
-23.5,1.37
-22.5,1.34
-21.5,1.32
-20.5,1.29
-19.5,1.24
-18.5,1.22
-17.5,1.19
-16.5,1.18
-15.5,1.18
-14.5,1.18
-13.5,1.17
-12.5,1.16
-11.5,1.17
-10.5,1.16
-9.5,1.16
-8.5,1.17
-7.5,1.15
-6.5,1.16
-5.5,1.19
-4.5,1.2
-3.5,1.24
-2.5,1.25
-1.5,1.26
-0.5,1.25
0.5,1.24
1.5,1.21
2.5,1.16
3.5,1.15
4.5,1.2
5.5,1.2
6.5,1.17
7.5,1.14
8.5,1.14
9.5,1.12
10.5,1.09
11.5,1.08
12.5,1.07
13.5,1.07
14.5,1.09
15.5,1.12
16.5,1.17
17.5,1.21
18.5,1.23
19.5,1.23
20.5,1.23
21.5,1.24
22.5,1.26
23.5,1.29
24.5,1.31
25.5,1.34
26.5,1.35
27.5,1.37
28.5,1.38
29.5,1.39
30.5,1.39
31.5,1.41
32.5,1.43
33.5,1.47
34.5,1.52
35.5,1.57
36.5,1.6
37.5,1.61
38.5,1.61
39.5,1.63
40.5,1.7
41.5,1.76
42.5,1.82
43.5,1.85
44.5,1.88
45.5,1.89
46.5,1.88
47.5,1.9
48.5,1.92
49.5,1.93
50.5,1.94
51.5,1.98
52.5,2.05
53.5,2.1
54.5,2.15
55.5,2.19
56.5,2.23
57.5,2.22
58.5,2.19
59.5,2.2
60.5,2.25
61.5,2.3
62.5,2.35
63.5,2.53
64.5,2.86
65.5,3.19
66.5,3.52
67.5,3.8
68.5,4.02
69.5,4.3
70.5,4.63
71.5,4.89
72.5,5.1
73.5,5.21
74.5,5.23
75.5,5.3
76.5,5.41
77.5,5.39
78.5,5.25
79.5,5.05
80.5,4.83
81.5,4.72
82.5,4.73
83.5,4.74
84.5,4.75
85.5,4.74
86.5,4.67
87.5,4.69
88.5,4.78
89.5,4.85
CCSM4
latitude, Tanom 
-89.5,3.68
-88.5,3.11
-87.5,2.38
-86.5,2.03
-85.5,2.37
-84.5,2.97
-83.5,3.87
-82.5,4.63
-81.5,4.7
-80.5,5.57
-79.5,5.89
-78.5,5.98
-77.5,6.09
-76.5,6.27
-75.5,6.55
-74.5,6.94
-73.5,7.48
-72.5,8.04
-71.5,8.06
-70.5,7.91
-69.5,7.46
-68.5,6.64
-67.5,6.1
-66.5,6.0
-65.5,6.31
-64.5,6.46
-63.5,6.37
-62.5,6.19
-61.5,5.93
-60.5,5.58
-59.5,5.17
-58.5,4.76
-57.5,4.35
-56.5,3.98
-55.5,3.68
-54.5,3.46
-53.5,3.28
-52.5,3.13
-51.5,3.01
-50.5,2.93
-49.5,2.89
-48.5,2.83
-47.5,2.78
-46.5,2.71
-45.5,2.65
-44.5,2.55
-43.5,2.45
-42.5,2.34
-41.5,2.25
-40.5,2.17
-39.5,2.09
-38.5,2.0
-37.5,1.92
-36.5,1.85
-35.5,1.78
-34.5,1.72
-33.5,1.66
-32.5,1.62
-31.5,1.6
-30.5,1.56
-29.5,1.54
-28.5,1.52
-27.5,1.49
-26.5,1.47
-25.5,1.43
-24.5,1.44
-23.5,1.46
-22.5,1.44
-21.5,1.41
-20.5,1.39
-19.5,1.39
-18.5,1.38
-17.5,1.39
-16.5,1.42
-15.5,1.43
-14.5,1.46
-13.5,1.44
-12.5,1.43
-11.5,1.42
-10.5,1.41
-9.5,1.41
-8.5,1.42
-7.5,1.42
-6.5,1.42
-5.5,1.45
-4.5,1.5
-3.5,1.55
-2.5,1.58
-1.5,1.58
-0.5,1.58
0.5,1.53
1.5,1.49
2.5,1.44
3.5,1.42
4.5,1.4
5.5,1.41
6.5,1.41
7.5,1.36
8.5,1.32
9.5,1.26
10.5,1.22
11.5,1.23
12.5,1.27
13.5,1.35
14.5,1.41
15.5,1.49
16.5,1.56
17.5,1.64
18.5,1.65
19.5,1.67
20.5,1.65
21.5,1.64
22.5,1.67
23.5,1.72
24.5,1.79
25.5,1.82
26.5,1.88
27.5,1.99
28.5,2.1
29.5,2.17
30.5,2.29
31.5,2.34
32.5,2.37
33.5,2.38
34.5,2.42
35.5,2.43
36.5,2.45
37.5,2.56
38.5,2.66
39.5,2.76
40.5,2.84
41.5,2.92
42.5,2.96
43.5,3.01
44.5,3.11
45.5,3.17
46.5,3.12
47.5,3.09
48.5,3.02
49.5,3.02
50.5,2.99
51.5,3.0
52.5,3.02
53.5,3.06
54.5,3.19
55.5,3.28
56.5,3.33
57.5,3.35
58.5,3.39
59.5,3.51
60.5,3.79
61.5,4.11
62.5,4.53
63.5,4.89
64.5,5.48
65.5,5.84
66.5,6.32
67.5,6.63
68.5,6.86
69.5,7.06
70.5,7.26
71.5,7.4
72.5,7.55
73.5,7.64
74.5,7.77
75.5,8.07
76.5,8.37
77.5,8.52
78.5,8.33
79.5,8.22
80.5,8.04
81.5,8.24
82.5,8.55
83.5,8.73
84.5,8.87
85.5,8.96
86.5,8.99
87.5,9.02
88.5,9.02
89.5,9.03
CCSM4-Utr
latitude, Tanom 
-89.5,7.83
-88.5,7.19
-87.5,6.78
-86.5,6.51
-85.5,6.75
-84.5,7.2
-83.5,7.81
-82.5,8.46
-81.5,8.77
-80.5,9.07
-79.5,10.43
-78.5,11.66
-77.5,12.08
-76.5,12.59
-75.5,13.35
-74.5,14.12
-73.5,14.87
-72.5,15.52
-71.5,16.03
-70.5,16.07
-69.5,15.72
-68.5,15.52
-67.5,15.4
-66.5,14.96
-65.5,14.42
-64.5,13.58
-63.5,12.68
-62.5,11.65
-61.5,10.63
-60.5,9.73
-59.5,8.88
-58.5,8.21
-57.5,7.61
-56.5,7.14
-55.5,6.74
-54.5,6.41
-53.5,6.12
-52.5,5.87
-51.5,5.62
-50.5,5.38
-49.5,5.16
-48.5,4.97
-47.5,4.77
-46.5,4.59
-45.5,4.41
-44.5,4.23
-43.5,4.07
-42.5,3.93
-41.5,3.81
-40.5,3.7
-39.5,3.61
-38.5,3.52
-37.5,3.42
-36.5,3.32
-35.5,3.21
-34.5,3.14
-33.5,3.09
-32.5,3.07
-31.5,3.06
-30.5,3.04
-29.5,3.01
-28.5,2.99
-27.5,2.98
-26.5,2.94
-25.5,2.91
-24.5,2.87
-23.5,2.83
-22.5,2.78
-21.5,2.75
-20.5,2.72
-19.5,2.7
-18.5,2.71
-17.5,2.73
-16.5,2.73
-15.5,2.77
-14.5,2.79
-13.5,2.79
-12.5,2.78
-11.5,2.74
-10.5,2.7
-9.5,2.71
-8.5,2.72
-7.5,2.77
-6.5,2.81
-5.5,2.85
-4.5,2.9
-3.5,2.9
-2.5,2.9
-1.5,2.91
-0.5,2.88
0.5,2.83
1.5,2.76
2.5,2.7
3.5,2.65
4.5,2.6
5.5,2.58
6.5,2.57
7.5,2.57
8.5,2.57
9.5,2.55
10.5,2.52
11.5,2.5
12.5,2.49
13.5,2.49
14.5,2.51
15.5,2.56
16.5,2.61
17.5,2.66
18.5,2.7
19.5,2.74
20.5,2.74
21.5,2.72
22.5,2.75
23.5,2.8
24.5,2.77
25.5,2.72
26.5,2.9
27.5,3.09
28.5,3.29
29.5,3.47
30.5,3.65
31.5,3.8
32.5,3.91
33.5,4.0
34.5,4.05
35.5,4.11
36.5,4.15
37.5,4.27
38.5,4.44
39.5,4.63
40.5,4.83
41.5,5.0
42.5,5.17
43.5,5.4
44.5,5.62
45.5,5.78
46.5,5.93
47.5,5.95
48.5,5.98
49.5,6.03
50.5,6.09
51.5,6.19
52.5,6.3
53.5,6.42
54.5,6.54
55.5,6.65
56.5,6.72
57.5,6.78
58.5,6.84
59.5,6.93
60.5,7.25
61.5,7.61
62.5,8.0
63.5,8.39
64.5,8.91
65.5,9.42
66.5,9.93
67.5,10.42
68.5,10.8
69.5,11.12
70.5,11.38
71.5,11.68
72.5,12.02
73.5,12.19
74.5,12.23
75.5,12.33
76.5,12.46
77.5,12.41
78.5,12.32
79.5,12.14
80.5,11.96
81.5,12.19
82.5,12.42
83.5,12.55
84.5,12.67
85.5,12.72
86.5,12.76
87.5,12.78
88.5,12.84
89.5,12.97
CCSM4-UoT
latitude, Tanom 
-89.5,2.71
-88.5,1.84
-87.5,1.35
-86.5,1.45
-85.5,2.93
-84.5,4.24
-83.5,3.92
-82.5,3.97
-81.5,5.95
-80.5,6.99
-79.5,6.93
-78.5,6.74
-77.5,7.14
-76.5,7.72
-75.5,8.3
-74.5,8.82
-73.5,9.65
-72.5,10.35
-71.5,10.74
-70.5,11.04
-69.5,11.08
-68.5,10.7
-67.5,10.55
-66.5,10.47
-65.5,10.56
-64.5,10.42
-63.5,10.01
-62.5,9.3
-61.5,8.65
-60.5,7.87
-59.5,7.2
-58.5,6.56
-57.5,6.04
-56.5,5.62
-55.5,5.27
-54.5,4.99
-53.5,4.76
-52.5,4.57
-51.5,4.39
-50.5,4.24
-49.5,4.12
-48.5,4.0
-47.5,3.88
-46.5,3.78
-45.5,3.66
-44.5,3.53
-43.5,3.39
-42.5,3.22
-41.5,3.07
-40.5,2.97
-39.5,2.87
-38.5,2.76
-37.5,2.65
-36.5,2.57
-35.5,2.47
-34.5,2.39
-33.5,2.34
-32.5,2.28
-31.5,2.21
-30.5,2.2
-29.5,2.15
-28.5,2.12
-27.5,2.06
-26.5,2.02
-25.5,2.02
-24.5,2.01
-23.5,1.96
-22.5,1.9
-21.5,1.91
-20.5,1.88
-19.5,1.84
-18.5,1.86
-17.5,1.9
-16.5,1.93
-15.5,1.96
-14.5,1.99
-13.5,1.99
-12.5,2.04
-11.5,2.06
-10.5,2.03
-9.5,2.08
-8.5,2.06
-7.5,2.08
-6.5,2.11
-5.5,2.19
-4.5,2.22
-3.5,2.25
-2.5,2.37
-1.5,2.41
-0.5,2.37
0.5,2.39
1.5,2.34
2.5,2.31
3.5,2.29
4.5,2.28
5.5,2.24
6.5,2.2
7.5,2.19
8.5,2.14
9.5,2.05
10.5,2.0
11.5,1.97
12.5,2.04
13.5,2.21
14.5,2.14
15.5,2.2
16.5,2.21
17.5,2.26
18.5,2.3
19.5,2.27
20.5,2.28
21.5,2.28
22.5,2.35
23.5,2.42
24.5,2.5
25.5,2.56
26.5,2.74
27.5,2.76
28.5,2.83
29.5,2.94
30.5,2.99
31.5,3.09
32.5,3.22
33.5,3.1
34.5,3.26
35.5,3.14
36.5,3.14
37.5,3.45
38.5,3.5
39.5,3.67
40.5,3.79
41.5,3.81
42.5,4.01
43.5,4.2
44.5,4.39
45.5,4.6
46.5,4.53
47.5,4.64
48.5,4.6
49.5,4.67
50.5,4.77
51.5,4.83
52.5,4.97
53.5,5.1
54.5,5.34
55.5,5.6
56.5,5.72
57.5,5.88
58.5,6.12
59.5,6.34
60.5,6.69
61.5,6.96
62.5,7.38
63.5,7.79
64.5,8.36
65.5,9.03
66.5,9.64
67.5,9.88
68.5,10.24
69.5,10.58
70.5,11.0
71.5,11.23
72.5,11.53
73.5,11.83
74.5,11.96
75.5,12.19
76.5,12.28
77.5,12.06
78.5,11.71
79.5,11.6
80.5,11.3
81.5,11.31
82.5,11.72
83.5,12.03
84.5,12.16
85.5,12.31
86.5,12.4
87.5,12.45
88.5,12.43
89.5,12.03
NorESM-L
latitude, Tanom 
-89.5,5.07
-88.5,4.92
-87.5,4.76
-86.5,4.61
-85.5,4.45
-84.5,4.3
-83.5,4.14
-82.5,4.89
-81.5,5.66
-80.5,6.43
-79.5,7.23
-78.5,8.08
-77.5,8.93
-76.5,9.79
-75.5,10.22
-74.5,10.34
-73.5,10.46
-72.5,10.58
-71.5,10.38
-70.5,10.12
-69.5,9.88
-68.5,9.55
-67.5,8.86
-66.5,8.16
-65.5,7.46
-64.5,6.72
-63.5,5.91
-62.5,5.11
-61.5,4.29
-60.5,3.84
-59.5,3.54
-58.5,3.22
-57.5,2.92
-56.5,2.92
-55.5,2.92
-54.5,2.93
-53.5,2.91
-52.5,2.87
-51.5,2.83
-50.5,2.79
-49.5,2.72
-48.5,2.63
-47.5,2.55
-46.5,2.45
-45.5,2.39
-44.5,2.33
-43.5,2.26
-42.5,2.19
-41.5,2.12
-40.5,2.03
-39.5,1.96
-38.5,1.88
-37.5,1.82
-36.5,1.75
-35.5,1.69
-34.5,1.64
-33.5,1.61
-32.5,1.56
-31.5,1.52
-30.5,1.49
-29.5,1.45
-28.5,1.41
-27.5,1.37
-26.5,1.29
-25.5,1.21
-24.5,1.14
-23.5,1.1
-22.5,1.08
-21.5,1.06
-20.5,1.04
-19.5,1.03
-18.5,1.01
-17.5,1.01
-16.5,0.99
-15.5,0.98
-14.5,0.96
-13.5,0.95
-12.5,0.95
-11.5,0.97
-10.5,0.98
-9.5,1.0
-8.5,1.04
-7.5,1.08
-6.5,1.11
-5.5,1.15
-4.5,1.17
-3.5,1.18
-2.5,1.19
-1.5,1.2
-0.5,1.2
0.5,1.19
1.5,1.2
2.5,1.17
3.5,1.14
4.5,1.1
5.5,1.07
6.5,1.04
7.5,1.01
8.5,0.99
9.5,0.96
10.5,0.91
11.5,0.88
12.5,0.83
13.5,0.82
14.5,0.85
15.5,0.88
16.5,0.9
17.5,0.94
18.5,0.99
19.5,1.05
20.5,1.09
21.5,1.12
22.5,1.14
23.5,1.17
24.5,1.2
25.5,1.22
26.5,1.24
27.5,1.26
28.5,1.31
29.5,1.37
30.5,1.42
31.5,1.48
32.5,1.53
33.5,1.58
34.5,1.63
35.5,1.67
36.5,1.69
37.5,1.7
38.5,1.72
39.5,1.73
40.5,1.71
41.5,1.7
42.5,1.69
43.5,1.67
44.5,1.65
45.5,1.62
46.5,1.59
47.5,1.58
48.5,1.57
49.5,1.55
50.5,1.55
51.5,1.58
52.5,1.61
53.5,1.64
54.5,1.7
55.5,1.77
56.5,1.83
57.5,1.9
58.5,2.03
59.5,2.16
60.5,2.28
61.5,2.47
62.5,2.81
63.5,3.14
64.5,3.48
65.5,3.91
66.5,4.41
67.5,4.92
68.5,5.42
69.5,5.73
70.5,6.0
71.5,6.27
72.5,6.51
73.5,6.53
74.5,6.56
75.5,6.58
76.5,6.57
77.5,6.51
78.5,6.45
79.5,6.38
80.5,6.17
81.5,5.89
82.5,5.6
83.5,5.32
84.5,5.02
85.5,4.72
86.5,4.43
87.5,4.12
88.5,3.82
89.5,3.53
MRI2.3
latitude, Tanom 
-89.5,6.3
-88.5,6.27
-87.5,6.24
-86.5,6.22
-85.5,6.19
-84.5,6.22
-83.5,6.27
-82.5,6.32
-81.5,6.52
-80.5,6.74
-79.5,6.96
-78.5,6.86
-77.5,6.75
-76.5,6.63
-75.5,6.48
-74.5,6.33
-73.5,6.19
-72.5,6.05
-71.5,5.9
-70.5,6.01
-69.5,6.26
-68.5,6.5
-67.5,6.16
-66.5,5.73
-65.5,5.29
-64.5,4.65
-63.5,4.01
-62.5,3.42
-61.5,2.97
-60.5,2.51
-59.5,2.2
-58.5,2.02
-57.5,1.84
-56.5,1.67
-55.5,1.52
-54.5,1.36
-53.5,1.25
-52.5,1.14
-51.5,1.03
-50.5,0.97
-49.5,0.91
-48.5,0.85
-47.5,0.78
-46.5,0.7
-45.5,0.65
-44.5,0.62
-43.5,0.58
-42.5,0.6
-41.5,0.63
-40.5,0.67
-39.5,0.73
-38.5,0.79
-37.5,0.85
-36.5,0.93
-35.5,1.0
-34.5,1.09
-33.5,1.17
-32.5,1.26
-31.5,1.31
-30.5,1.33
-29.5,1.34
-28.5,1.35
-27.5,1.37
-26.5,1.38
-25.5,1.39
-24.5,1.39
-23.5,1.39
-22.5,1.42
-21.5,1.45
-20.5,1.46
-19.5,1.47
-18.5,1.48
-17.5,1.49
-16.5,1.5
-15.5,1.49
-14.5,1.51
-13.5,1.52
-12.5,1.52
-11.5,1.5
-10.5,1.48
-9.5,1.46
-8.5,1.46
-7.5,1.46
-6.5,1.48
-5.5,1.51
-4.5,1.54
-3.5,1.56
-2.5,1.57
-1.5,1.59
-0.5,1.55
0.5,1.52
1.5,1.49
2.5,1.44
3.5,1.4
4.5,1.37
5.5,1.36
6.5,1.36
7.5,1.39
8.5,1.44
9.5,1.49
10.5,1.55
11.5,1.6
12.5,1.65
13.5,1.69
14.5,1.72
15.5,1.76
16.5,1.86
17.5,1.96
18.5,2.04
19.5,2.12
20.5,2.2
21.5,2.26
22.5,2.31
23.5,2.37
24.5,2.37
25.5,2.37
26.5,2.36
27.5,2.38
28.5,2.41
29.5,2.41
30.5,2.38
31.5,2.34
32.5,2.32
33.5,2.32
34.5,2.31
35.5,2.36
36.5,2.43
37.5,2.51
38.5,2.62
39.5,2.75
40.5,2.87
41.5,2.98
42.5,3.08
43.5,3.18
44.5,3.27
45.5,3.36
46.5,3.42
47.5,3.44
48.5,3.46
49.5,3.55
50.5,3.68
51.5,3.81
52.5,3.86
53.5,3.9
54.5,3.95
55.5,4.11
56.5,4.26
57.5,4.42
58.5,4.62
59.5,4.81
60.5,5.07
61.5,5.39
62.5,5.71
63.5,5.97
64.5,6.2
65.5,6.43
66.5,6.81
67.5,7.22
68.5,7.61
69.5,7.95
70.5,8.27
71.5,8.54
72.5,8.69
73.5,8.85
74.5,8.93
75.5,8.95
76.5,8.99
77.5,8.97
78.5,8.95
79.5,8.91
80.5,8.76
81.5,8.6
82.5,8.43
83.5,8.16
84.5,7.9
85.5,7.66
86.5,7.47
87.5,7.29
88.5,7.1
89.5,6.93
NorESM1-F
latitude, Tanom 
-89.5,2.56
-88.5,2.52
-87.5,2.49
-86.5,2.47
-85.5,2.46
-84.5,2.48
-83.5,2.53
-82.5,2.6
-81.5,2.66
-80.5,2.72
-79.5,2.78
-78.5,2.84
-77.5,2.94
-76.5,3.04
-75.5,3.13
-74.5,3.21
-73.5,3.3
-72.5,3.38
-71.5,3.44
-70.5,3.49
-69.5,3.54
-68.5,3.56
-67.5,3.58
-66.5,3.56
-65.5,3.55
-64.5,3.44
-63.5,3.31
-62.5,3.09
-61.5,2.86
-60.5,2.65
-59.5,2.45
-58.5,2.29
-57.5,2.13
-56.5,2.01
-55.5,1.94
-54.5,1.9
-53.5,1.87
-52.5,1.86
-51.5,1.84
-50.5,1.81
-49.5,1.78
-48.5,1.73
-47.5,1.7
-46.5,1.68
-45.5,1.64
-44.5,1.59
-43.5,1.54
-42.5,1.48
-41.5,1.45
-40.5,1.41
-39.5,1.39
-38.5,1.37
-37.5,1.34
-36.5,1.32
-35.5,1.28
-34.5,1.26
-33.5,1.24
-32.5,1.22
-31.5,1.21
-30.5,1.19
-29.5,1.17
-28.5,1.16
-27.5,1.15
-26.5,1.11
-25.5,1.07
-24.5,1.05
-23.5,1.02
-22.5,1.01
-21.5,0.98
-20.5,0.95
-19.5,0.94
-18.5,0.96
-17.5,0.99
-16.5,1.03
-15.5,1.1
-14.5,1.17
-13.5,1.19
-12.5,1.19
-11.5,1.17
-10.5,1.14
-9.5,1.16
-8.5,1.18
-7.5,1.2
-6.5,1.22
-5.5,1.21
-4.5,1.2
-3.5,1.2
-2.5,1.2
-1.5,1.21
-0.5,1.2
0.5,1.2
1.5,1.18
2.5,1.16
3.5,1.11
4.5,1.04
5.5,1.03
6.5,1.04
7.5,1.03
8.5,1.01
9.5,0.93
10.5,0.86
11.5,0.8
12.5,0.76
13.5,0.78
14.5,0.82
15.5,0.88
16.5,0.95
17.5,1.04
18.5,1.11
19.5,1.18
20.5,1.2
21.5,1.21
22.5,1.2
23.5,1.2
24.5,1.22
25.5,1.24
26.5,1.32
27.5,1.42
28.5,1.51
29.5,1.59
30.5,1.63
31.5,1.67
32.5,1.67
33.5,1.69
34.5,1.7
35.5,1.7
36.5,1.7
37.5,1.7
38.5,1.72
39.5,1.74
40.5,1.78
41.5,1.83
42.5,1.89
43.5,1.95
44.5,2.02
45.5,1.99
46.5,1.96
47.5,1.93
48.5,1.9
49.5,1.88
50.5,1.86
51.5,1.85
52.5,1.88
53.5,1.96
54.5,2.05
55.5,2.15
56.5,2.23
57.5,2.29
58.5,2.35
59.5,2.42
60.5,2.73
61.5,3.11
62.5,3.45
63.5,3.79
64.5,4.3
65.5,4.79
66.5,5.08
67.5,5.36
68.5,5.58
69.5,5.75
70.5,5.82
71.5,5.88
72.5,5.94
73.5,5.94
74.5,5.88
75.5,5.93
76.5,6.05
77.5,6.0
78.5,5.88
79.5,5.97
80.5,6.07
81.5,6.01
82.5,5.96
83.5,5.93
84.5,5.9
85.5,5.85
86.5,5.81
87.5,5.75
88.5,5.71
89.5,5.71
