# Supplementary material for: The Pliocene Model Intercomparison Project Phase 2: large-scale climate features and climate sensitivity
Source: Copernicus journal article supplement (doi:10.5194/cp-16-2095-2020), 2020-11-04
Supplement: Supplementary file 2 [file cp-16-2095-2020-supplement.zip › Supplementary/data_for_3b_3c_3d.txt]

data for 3c 
model_name, nh_anom_et, sh_anom_et 
CESM2,8.32,7.69
IPSLCM6A,5.85,5.95
COSMOS,5.65,4.43
EC-Earth3.3,9.35,5.9
CESM1.2,7.07,6.61
IPSLCM5A,4.04,2.56
MIROC4m,5.36,4.23
IPSLCM5A2,3.67,2.74
HadCM3,4.6,4.09
GISS2.1G,2.9,5.02
CCSM4,4.73,4.7
CCSM4-Utr,8.2,9.15
CCSM4-UoT,7.34,6.69
NorESM-L,3.13,5.0
MRI2.3,5.47,3.13
NorESM1-F,3.4,2.48
data for 3d 
model_name, nh_anom_polar, sh_anom_polar, global_anom 
CESM2,10.52,10.78,5.18
IPSLCM6A,7.73,8.68,3.48
COSMOS,7.26,6.87,3.33
EC-Earth3.3,11.36,8.45,4.84
CESM1.2,9.76,9.32,4.03
IPSLCM5A,5.18,4.11,2.3
MIROC4m,7.07,6.41,3.13
IPSLCM5A2,4.89,4.34,2.17
HadCM3,5.22,6.55,2.89
GISS2.1G,3.93,7.32,2.13
CCSM4,6.6,6.28,2.61
CCSM4-Utr,10.45,12.89,4.74
CCSM4-UoT,9.96,8.97,3.79
NorESM-L,4.82,7.59,2.09
MRI2.3,7.37,5.39,2.45
NorESM1-F,5.02,3.18,1.74
data for 3b 
model_name, land_anomaly, sea_anomaly, tropical_land_anomaly, tropical_sea_anomaly
CESM2,6.58,4.69,4.23,3.52
IPSLCM6A,4.61,3.14,2.72,2.21
COSMOS,4.97,2.74,3.33,2.35
EC-Earth3.3,6.64,4.21,3.9,2.96
CESM1.2,5.09,3.72,2.89,2.46
IPSLCM5A,3.37,1.96,2.17,1.62
MIROC4m,4.63,2.6,2.95,2.14
IPSLCM5A2,3.15,1.87,1.99,1.51
HadCM3,4.47,2.34,2.97,1.69
GISS2.1G,2.57,2.08,1.46,1.09
CCSM4,3.51,2.36,1.64,1.42
CCSM4-Utr,5.6,4.5,2.9,2.67
CCSM4-UoT,4.77,3.51,2.32,2.13
NorESM-L,2.64,2.0,0.95,1.08
MRI2.3,3.71,2.04,2.04,1.42
NorESM1-F,2.52,1.52,1.13,1.07
