# Supplementary material for: The Pliocene Model Intercomparison Project Phase 2: large-scale climate features and climate sensitivity
Source: Copernicus journal article supplement (doi:10.5194/cp-16-2095-2020), 2020-11-04
Supplement: Supplementary file 2 [file cp-16-2095-2020-supplement.zip › Supplementary/data_for_5a_6a.txt]

data_for_5a 
modelname, Pliocore_global_mean, pliocore_global_mean_2sigma, picntl_global_mean, picntl_global_mean_2sigma 
CESM2,3.28,0.02,2.95,0.03
IPSLCM6A,3.17,0.02,2.97,0.02
COSMOS,2.88,0.03,2.72,0.03
EC-Earth3.3,3.13,0.02,2.82,0.02
CESM1.2,3.32,0.02,3.06,0.02
IPSLCM5A,2.8,0.02,2.66,0.01
MIROC4m,2.85,0.02,2.68,0.01
IPSLCM5A2,2.93,0.02,2.79,0.02
HadCM3,3.03,0.01,2.91,0.02
GISS2.1G,3.04,0.02,2.97,0.03
CCSM4,3.08,0.01,2.93,0.02
CCSM4-Utr,3.23,0.02,2.86,0.02
CCSM4-UoT,3.13,0.02,2.91,0.02
NorESM-L,2.88,0.01,2.74,0.02
MRI2.3,2.73,0.02,2.59,0.02
NorESM1-F,2.98,0.02,2.84,0.02

data_for_6a 
modelname, Jan, Feb, Mar, Apr, May, Jun, Jul, Aug, Sep, Oct, Nov, Dec 
CESM2,0.28,0.1,0.09,0.03,0.09,0.41,0.56,0.61,0.65,0.68,0.54,0.47
IPSLCM6A,0.24,0.18,0.12,0.13,0.17,0.28,0.3,0.3,0.37,0.42,0.41,0.32
COSMOS,0.31,0.17,0.12,0.13,0.29,0.37,0.4,0.4,0.44,0.46,0.48,0.43
EC-Earth3.3,0.35,0.34,0.33,0.33,0.37,0.51,0.57,0.59,0.63,0.7,0.55,0.4
CESM1.2,0.24,0.16,0.17,0.14,0.22,0.39,0.41,0.39,0.31,0.36,0.37,0.36
IPSLCM5A,0.17,0.13,0.12,0.12,0.17,0.27,0.28,0.29,0.32,0.34,0.35,0.24
MIROC4m,0.2,0.15,0.15,0.21,0.27,0.25,0.34,0.36,0.41,0.44,0.35,0.32
IPSLCM5A2,0.16,0.1,0.06,0.07,0.09,0.15,0.16,0.2,0.27,0.28,0.3,0.25
HadCM3,0.29,0.3,0.39,0.41,0.39,0.41,0.27,0.27,0.38,0.35,0.28,0.26
GISS2.1G,0.02,0.06,0.05,0.11,0.12,0.13,0.06,0.02,0.03,0.05,0.03,0.03
CCSM4,0.14,0.11,0.12,0.13,0.2,0.37,0.29,0.24,0.21,0.22,0.2,0.19
CCSM4-Utr,0.29,0.18,0.16,0.2,0.31,0.57,0.64,0.58,0.57,0.57,0.55,0.44
CCSM4-UoT,0.19,0.12,0.17,0.21,0.27,0.44,0.43,0.31,0.3,0.31,0.26,0.24
NorESM-L,0.15,0.16,0.15,0.11,0.12,0.27,0.28,0.25,0.21,0.21,0.19,0.16
MRI2.3,0.17,0.05,0.03,0.08,0.21,0.28,0.3,0.38,0.42,0.45,0.47,0.31
NorESM1-F,0.11,0.06,0.07,0.07,0.13,0.25,0.25,0.22,0.22,0.24,0.24,0.23
