# Supplementary material for: The Pliocene Model Intercomparison Project Phase 2: large-scale climate features and climate sensitivity
Source: Copernicus journal article supplement (doi:10.5194/cp-16-2095-2020), 2020-11-04
Supplement: Supplementary file 2 [file cp-16-2095-2020-supplement.zip › Supplementary/data_for_6b.txt]

data for 6b 
model_name, land_anomaly, sea_anomaly, tropical_land_anomaly, tropical_sea_anomaly
CESM2,0.35,0.34,0.22,0.4
IPSLCM6A,0.24,0.19,0.21,0.23
COSMOS,0.12,0.2,0.04,0.32
EC-Earth3.3,0.51,0.24,0.71,0.31
CESM1.2,0.34,0.24,0.41,0.24
IPSLCM5A,0.18,0.15,0.25,0.25
MIROC4m,0.34,0.11,0.54,0.19
IPSLCM5A2,0.17,0.14,0.26,0.22
HadCM3,0.32,0.05,0.43,-0.01
GISS2.1G,0.11,0.08,0.02,0.01
CCSM4,0.28,0.11,0.41,0.09
CCSM4-Utr,0.59,0.29,0.78,0.32
CCSM4-UoT,0.41,0.14,0.7,0.12
NorESM-L,0.33,0.08,0.61,0.03
MRI2.3,0.16,0.14,-0.09,0.4
NorESM1-F,0.3,0.08,0.53,0.1
