# Supplementary material for: The Pliocene Model Intercomparison Project Phase 2: large-scale climate features and climate sensitivity
Source: Copernicus journal article supplement (doi:10.5194/cp-16-2095-2020), 2020-11-04
Supplement: Supplementary file 2 [file cp-16-2095-2020-supplement.zip › Supplementary/data_for_7a-b.txt]

Data for Figure 7a
model name, Plio_core - PI_Cntl, ECS
CCSM4-Utr,4.74,3.2
COSMOS,3.33,4.7
CCSM4,2.61,3.2
EC-Earth3.3,4.84,4.3
CESM1.2,4.03,4.1
CESM2,5.17,5.3
GISS2.1G,2.13,3.3
HadCM3,2.89,3.5
IPSLCM6A,3.48,4.8
IPSLCM5A2,2.17,3.6
IPSLCM5A,2.29,4.1
MIROC4m,3.14,3.9
MRI2.3,2.45,2.8
NorESM-L,2.09,3.1
NorESM1-F,1.73,2.3
CCSM4-UoT,3.79,3.2

Data for Figure 7b
latitude, Pvalue, Rsqvalue
-89.5,0.711,0.01
-88.5,0.704,0.01
-87.5,0.764,0.01
-86.5,0.58,0.02
-85.5,0.241,0.1
-84.5,0.073,0.21
-83.5,0.025,0.31
-82.5,0.022,0.32
-81.5,0.02,0.33
-80.5,0.015,0.36
-79.5,0.019,0.33
-78.5,0.023,0.32
-77.5,0.023,0.32
-76.5,0.026,0.31
-75.5,0.035,0.28
-74.5,0.041,0.27
-73.5,0.042,0.26
-72.5,0.049,0.25
-71.5,0.072,0.21
-70.5,0.101,0.18
-69.5,0.135,0.15
-68.5,0.216,0.11
-67.5,0.324,0.07
-66.5,0.403,0.05
-65.5,0.467,0.04
-64.5,0.5,0.03
-63.5,0.56,0.02
-62.5,0.595,0.02
-61.5,0.606,0.02
-60.5,0.58,0.02
-59.5,0.543,0.03
-58.5,0.5,0.03
-57.5,0.445,0.04
-56.5,0.406,0.05
-55.5,0.372,0.06
-54.5,0.341,0.06
-53.5,0.321,0.07
-52.5,0.307,0.07
-51.5,0.289,0.08
-50.5,0.278,0.08
-49.5,0.26,0.09
-48.5,0.244,0.1
-47.5,0.226,0.1
-46.5,0.212,0.11
-45.5,0.182,0.12
-44.5,0.151,0.14
-43.5,0.12,0.16
-42.5,0.095,0.19
-41.5,0.077,0.21
-40.5,0.067,0.22
-39.5,0.062,0.23
-38.5,0.054,0.24
-37.5,0.049,0.25
-36.5,0.045,0.26
-35.5,0.037,0.28
-34.5,0.029,0.3
-33.5,0.025,0.31
-32.5,0.022,0.32
-31.5,0.02,0.33
-30.5,0.018,0.34
-29.5,0.014,0.36
-28.5,0.012,0.37
-27.5,0.01,0.38
-26.5,0.008,0.41
-25.5,0.006,0.43
-24.5,0.005,0.44
-23.5,0.003,0.47
-22.5,0.003,0.49
-21.5,0.002,0.49
-20.5,0.002,0.51
-19.5,0.002,0.52
-18.5,0.002,0.52
-17.5,0.002,0.52
-16.5,0.001,0.53
-15.5,0.002,0.52
-14.5,0.002,0.51
-13.5,0.002,0.51
-12.5,0.002,0.52
-11.5,0.001,0.53
-10.5,0.001,0.55
-9.5,0.001,0.56
-8.5,0.001,0.58
-7.5,0.001,0.58
-6.5,0.001,0.57
-5.5,0.001,0.57
-4.5,0.001,0.56
-3.5,0.001,0.56
-2.5,0.001,0.54
-1.5,0.001,0.54
-0.5,0.001,0.54
0.5,0.001,0.54
1.5,0.001,0.56
2.5,0.001,0.58
3.5,0.001,0.59
4.5,0.0,0.59
5.5,0.0,0.6
6.5,0.0,0.59
7.5,0.001,0.58
8.5,0.0,0.59
9.5,0.0,0.62
10.5,0.0,0.63
11.5,0.0,0.62
12.5,0.0,0.61
13.5,0.0,0.62
14.5,0.0,0.65
15.5,0.0,0.66
16.5,0.0,0.66
17.5,0.0,0.66
18.5,0.0,0.64
19.5,0.0,0.62
20.5,0.0,0.6
21.5,0.001,0.57
22.5,0.001,0.53
23.5,0.002,0.5
24.5,0.003,0.49
25.5,0.003,0.49
26.5,0.004,0.46
27.5,0.004,0.45
28.5,0.005,0.44
29.5,0.005,0.43
30.5,0.005,0.44
31.5,0.006,0.43
32.5,0.005,0.44
33.5,0.004,0.45
34.5,0.004,0.46
35.5,0.004,0.46
36.5,0.004,0.46
37.5,0.006,0.43
38.5,0.01,0.39
39.5,0.014,0.36
40.5,0.014,0.36
41.5,0.018,0.34
42.5,0.025,0.31
43.5,0.035,0.28
44.5,0.045,0.26
45.5,0.048,0.25
46.5,0.045,0.26
47.5,0.042,0.26
48.5,0.038,0.27
49.5,0.038,0.27
50.5,0.039,0.27
51.5,0.04,0.27
52.5,0.04,0.27
53.5,0.041,0.27
54.5,0.039,0.27
55.5,0.041,0.27
56.5,0.039,0.27
57.5,0.04,0.27
58.5,0.043,0.26
59.5,0.046,0.26
60.5,0.06,0.23
61.5,0.077,0.21
62.5,0.1,0.18
63.5,0.117,0.17
64.5,0.135,0.15
65.5,0.159,0.14
66.5,0.185,0.12
67.5,0.2,0.11
68.5,0.202,0.11
69.5,0.197,0.12
70.5,0.177,0.13
71.5,0.155,0.14
72.5,0.143,0.15
73.5,0.132,0.15
74.5,0.11,0.17
75.5,0.092,0.19
76.5,0.079,0.2
77.5,0.061,0.23
78.5,0.049,0.25
79.5,0.051,0.25
80.5,0.057,0.23
81.5,0.073,0.21
82.5,0.092,0.19
83.5,0.099,0.18
84.5,0.098,0.18
85.5,0.097,0.18
86.5,0.097,0.18
87.5,0.095,0.19
88.5,0.094,0.19
89.5,0.083,0.2
