# Supplementary material for: The Pliocene Model Intercomparison Project Phase 2: large-scale climate features and climate sensitivity
Source: Copernicus journal article supplement (doi:10.5194/cp-16-2095-2020), 2020-11-04
Supplement: Supplementary file 2 [file cp-16-2095-2020-supplement.zip › Supplementary/data_for_supp_fig2_Land.txt]

modelname	60S-90S	30S-60S	0N-30S	30N-0N	60N-30N	90N-60N
CESM2	6.7	4.61	4.4	4.47	6.1	10.17
IPSLCM6A	4.55	2.61	2.6	3.01	4.03	7.34
COSMOS	5.82	2.11	3.9	3.31	3.92	7.32
EC-Earth3.3	5.24	3.92	4.13	4.68	7.14	10.7
CESM1.2	4.77	3.24	3.03	3.16	4.39	8.95
IPSLCM5A	1.63	1.61	1.98	2.5	2.97	4.97
MIROC4m	4.1	2.37	3.43	3.02	3.95	7.18
IPSLCM5A2	1.51	1.74	1.95	2.2	2.55	4.72
HadCM3	3.43	2.51	3.25	3.07	4.4	5.22
GISS2.1G	4.19	2.19	1.64	1.6	1.43	3.17
CCSM4	2.69	2.04	1.71	1.96	2.94	6.36
CCSM4-Utr	7.68	3.72	3.2	2.86	5.3	9.61
CCSM4-UoT	3.48	2.74	2.3	2.95	4.59	9.02
NorESM-L	5.31	1.71	1.14	0.94	1.71	4.67
MRI2.3	2.94	1.92	2.21	2.23	2.82	6.63
NorESM1-F	0.36	1.56	1.31	1.2	1.83	5.03
