# Supplementary material for: The Pliocene Model Intercomparison Project Phase 2: large-scale climate features and climate sensitivity
Source: Copernicus journal article supplement (doi:10.5194/cp-16-2095-2020), 2020-11-04
Supplement: Supplementary file 2 [file cp-16-2095-2020-supplement.zip › Supplementary/data_for_supp_fig7.txt]

modelname	global mean SAT	oceanSAT
CESM2	5.175	3.902
IPSLCM6A	3.477	2.533
COSMOS	3.327	1.91
EC-Earth3.3	4.841	3.48
CESM1.2	4.033	2.855
IPSLCM5A	2.297	1.574
MIROC4m	3.131	2.055
IPSLCM5A2	2.169	1.529
HadCM3	2.891	1.72
GISS2.1G	2.132	1.488
CCSM4	2.607	1.695
CCSM4-Utr	4.739	3.435
CCSM4-UoT	3.79	2.585
NorESM-L	2.092	1.573
MRI2.3	2.454	1.402
NorESM1-F	1.735	1.357
modelname	global mean SAT	oceanSAT _60N-60S_
CESM2	5.175	3.882
IPSLCM6A	3.477	2.34
COSMOS	3.327	1.968
EC-Earth3.3	4.841	3.391
CESM1.2	4.033	2.853
IPSLCM5A	2.297	1.542
MIROC4m	3.131	2.087
IPSLCM5A2	2.169	1.475
HadCM3	2.891	1.781
GISS2.1G	2.132	1.489
CCSM4	2.607	1.775
CCSM4-Utr	4.739	3.44
CCSM4-UoT	3.79	2.549
NorESM-L	2.092	1.433
MRI2.3	2.454	1.316
NorESM1-F	1.735	1.243
