# Supplementary material for: The Pliocene Model Intercomparison Project Phase 2: large-scale climate features and climate sensitivity
Source: Copernicus journal article supplement (doi:10.5194/cp-16-2095-2020), 2020-11-04
Supplement: Supplementary file 2 [file cp-16-2095-2020-supplement.zip › Supplementary/fig8_cs_mp_sst_data_30k_plus_NOAA.csv]

Location or site	Latitude	Longitude	Uk'37 SSTC	N	Standard dev.	Reference	Data URL				HadISST	Anom	NOAAERSST5
Monte dei Corvi PP1	43.35	13.34	25.8	6	0.239	Herbert and others, 2018a	https://doi.org/10.1594/PANGAEA.885603				17.36	8.44	17.23	8.57
DSDP 593	-40.51	167.67	16	3	0.916	McClymont and others, 2016	https://www1.ncdc.noaa.gov/pub/data/paleo/contributions_by_author/mcclymont2016/mcclymont2016-dsdp593.txt				15.03	0.97	15.49	0.51
DSDP 594	-45.52	174.95	11.9	3	1.302	Herbert and others, 2016	https://www.ncdc.noaa.gov/paleo/study/25390				10.87	1.03	10.66	1.24
DSDP 607	41	-32.97	21.2	7	0.295	Lawrence and others, 2010	https://www1.ncdc.noaa.gov/pub/data/paleo/contributions_by_author/lawrence2010/lawrence2010.txt				12.55	8.65	17.76	3.44
DSDP 609	49.88	-24.23	18.5	6	0.667	Lawrence and Woodard, 2017	https://www1.ncdc.noaa.gov/pub/data/paleo/contributions_by_author/lawrence2017/lawrence2017-609b.txt				5.94	12.56	13.35	5.15
ODP 625	28.83	-87.16	27.6	3	0.078	Dowsett and others, 2017	https://doi.org/10.5066/F7959G1S				23.04	4.56	25.30	2.30
ODP 642	67.23	2.93	13.8	17	0.497	Bachem and others, 2016	https://doi.pangaea.de/10.1594/PANGAEA.865205				7.16	6.64	6.78	7.02
ODP 662	-1.39	-11.74	27.4	13	0.137	Herbert and others, 2010	https://www1.ncdc.noaa.gov/pub/data/paleo/contributions_by_author/herbert2010/herbert2010.txt				28.37	-0.97	25.31	2.09
ODP 677	1.2	-84.73	28.4	5	0.183	Robinson and others, 2008	https://pubs.usgs.gov/ds/353/				28.24	0.16	26.12	2.28
ODP 722	16.62	59.8	27.9	16	0.116	Herbert and others, 2016	https://www.ncdc.noaa.gov/paleo/study/25390				26.14	1.76	26.10	1.80
ODP 846	-3.1	-90.82	26.3	8	0.26	Herbert and others, 2016	https://www.ncdc.noaa.gov/paleo/study/25390				28.66	-2.36	23.78	2.52
ODP 882	50.36	167.6	9.5	1	-	Haug and Sarnthein, 2005	https://doi.pangaea.de/10.1594/PANGAEA.315092				5.38	4.12	5.64	3.86
ODP 883	51.2	167.77	8.7	2	1.039	Herbert and others, 2016	https://www.ncdc.noaa.gov/paleo/study/25390				5.31	3.39	5.41	3.29
ODP 907	69.25	12.7	6.1	3	2.375	Herbert and others, 2018b	https://doi.pangaea.de/10.1594/PANGAEA.885594				7.13	-1.03	6.33	-0.23
ODP 909	78.59	3.07	15.1	1	-	Dowsett and others, 2017	https://doi.org/10.5066/F7959G1S				1.55	13.55	0.50	14.60
*ODP 925	4.2	-43.49	28.7	3	0.316	Dowsett and others, 2017	https://doi.org/10.5066/F7959G1S				28.36	0.34	27.31	1.39
ODP 958	24	-20	25	2	0.106	Dowsett and others, 2017	https://doi.org/10.5066/F7959G1S				25.30	-0.30	21.51	3.49
ODP 978	36.23	-2.05	27.2	8	0.148	Kh-lifi and others, 2014	https://doi.pangaea.de/10.1594/PANGAEA.863960				17.66	9.54	18.10	9.10
ODP 982	57.52	-15.87	17.2	10	0.435	Herbert and others, 2016	https://www.ncdc.noaa.gov/paleo/study/25390				4.64	12.56	10.67	6.53
ODP 999	12.75	-78.73	28	2	0.113	Badger and others, 2013	https://doi.pangaea.de/10.1594/PANGAEA.836116				27.50	0.50	27.59	0.41
ODP 1010	29.97	-118.1	17.4	2	1.64	Herbert and others, 2016	https://www.ncdc.noaa.gov/paleo/study/25390				22.33	-4.93	17.08	0.32
ODP 1018	36.99	-123.28	15.2	6	0.337	Dowsett and others, 2017	https://doi.org/10.5066/F7959G1S				17.66	-2.46	13.97	1.23
ODP 1062	28.25	-74.41	22.9	3	0.167	Dowsett and others, 2017	https://doi.org/10.5066/F7959G1S				23.04	-0.14	25.22	-2.32
ODP 1073	39.23	-72.28	23.4	6	0.125	Dowsett and others, 2017	https://doi.org/10.5066/F7959G1S				14.80	8.60	13.46	9.94
ODP 1081	-19.62	11.32	24.3	1	-	Rosell-Mel- and others, 2014a	https://doi.pangaea.de/10.1594/PANGAEA.841833				18.07	6.23	16.09	8.21
ODP 1082	-21.1	11.82	25.9	5	0.327	Etourneau and others, 2009	https://doi.pangaea.de/10.1594/PANGAEA.729403				18.05	7.85	16.51	9.39
OPD 1084	-25.52	13.03	24.6	2	0.354	Rosell-Mel- and others, 2014b	https://doi.pangaea.de/10.1594/PANGAEA.841834				16.41	8.19	16.25	8.35
ODP 1087	-31.47	15.32	20.6	13	0.511	Petrick and others, 2018	https://doi.pangaea.de/10.1594/PANGAEA.888605				17.34	3.26	16.93	3.67
OPD 1088	-41.13	13.57	16.9	1	-	Herbert and others, 2016	https://www.ncdc.noaa.gov/paleo/study/25390				12.12	4.78	11.63	5.27
*OPD 1115	-9.19	151.57	28.9	4	0.047	Dowsett and others, 2017	https://doi.org/10.5066/F7959G1S				28.08	0.82	28.00	0.90
ODP 1125	-42.55	-178.17	19.7	16	0.624	Caballero-Gill and others, 2019	https://doi.pangaea.de/10.1594/PANGAEA.898162				13.90	5.80	14.54	5.16
OPD 1143	9.37	113.28	28.9	7	0.017	Li and others, 2011	https://doi.pangaea.de/10.1594/PANGAEA.786444				28.06	0.84	28.44	0.46
ODP 1146	19.46	116.27	28.6	20	0.036	Dowsett and others, 2017	https://doi.org/10.5066/F7959G1S				26.29	2.31	25.98	2.62
ODP 1241	5.85	-86.45	28.2	1	-	Herbert and others, 2016	https://www.ncdc.noaa.gov/paleo/study/25390				28.32	-0.12	27.73	0.47
IODP 1308	49.88	-24.24	17.2	7	0.25	Dowsett and others, 2017	https://doi.org/10.5066/F7959G1S				5.94	11.26	13.35	3.85
IODP 1313	41	-32.95	20.9	28	0.689	Dowsett and others, 2017	https://doi.org/10.5066/F7959G1S				12.55	8.35	17.76	3.14
IODP 1425	39.49	134.44	18.5	1	-	Wittkopp and others, 2017	https://doi.pangaea.de/10.1594/PANGAEA.879792				13.22	5.28	12.77	5.73
* some readings incorporated in calculations are at the maximum for this paleothermometry method. Actual SST may be higher.
