# Supplementary material for: The Pliocene Model Intercomparison Project Phase 2: large-scale climate features and climate sensitivity
Source: Copernicus journal article supplement (doi:10.5194/cp-16-2095-2020), 2020-11-04
Supplement: Supplementary file 2 [file cp-16-2095-2020-supplement.zip › Supplementary/fig8_modeloutput_CSCD_localities_Apr_2020.xls]

## Sheet: EOI400
site	lat	lon	CCSM4	CCSM4-UoT	CCSM4-Utr	CESM1.2	CESM2	COSMOS	EC-Earth3.3	GISS2.1G	HadCM3	IPSLCM6A	IPSLCM5A2	IPSLCM5A	MIROC4m	MRI2.3	NorESM-L	NorESM1-F	MMM	MM-SD
1	43.35	13.34	nan	nan	nan	nan	nan	nan	nan	nan	nan	nan	nan	nan	18.1638	nan	nan	nan	18.1638	0
2	-40.51	167.67	17.5256	18.3095	19.7322	18.0639	19.6301	12.1495	18.885	16.1714	17.2715	15.1844	13.0191	11.6078	12.2872	13.5519	14.6902	17.4989	15.9736	2.69716
3	-45.52	174.95	13.7166	14.5169	16.4636	14.8899	16.0248	9.00731	15.0125	11.9936	13.7557	12.0745	9.52939	8.8313	9.6651	10.9897	nan	13.2539	12.6483	2.48676
4	41	-32.97	21.5929	21.0666	23.3912	22.5348	24.2815	16.5641	22.6421	18.2891	17.4595	19.7304	19.5739	17.4388	19.2932	17.7277	18.8701	22.7818	20.2023	2.35765
5	49.88	-24.23	15.6255	17.5886	19.0776	16.8754	18.6853	11.0567	18.766	14.4633	13.7717	13.5412	14.3248	10.6643	12.4439	9.64849	14.3244	17.9474	14.9253	2.93636
6	28.83	-87.16	26.079	26.7074	28.3241	26.7102	28.4815	nan	27.6141	24.5426	nan	25.9447	26.227	25.5863	28.0224	26.2605	23.9847	26.8437	26.5234	1.27113
7	67.23	2.93	9.79664	10.1299	9.63557	11.072	12.2121	10.598	12.1584	6.83109	10.5451	10.4422	7.40737	6.21988	9.6554	5.75556	6.25578	8.55886	9.20462	2.04486
8	-1.39	-11.74	28.4878	29.1119	30.3959	28.6712	31.3332	29.4055	29.5738	28.7879	29.1447	27.3027	27.8321	27.0728	27.8618	28.6086	27.0385	28.29	28.6824	1.13139
9	1.2	-84.73	27.2413	27.0324	28.1013	28.0824	31.0177	28.7568	29.4319	27.7527	30.1797	27.3416	28.8091	28.5114	27.7555	28.1222	27.182	27.1501	28.2793	1.10788
10	16.62	59.8	27.191	27.7868	29.4615	28.3921	30.2544	27.7045	28.6685	28.3799	28.2657	27.3721	27.3873	26.2198	27.655	26.9478	26.0645	27.5328	27.8302	1.04551
11	-3.1	-90.82	26.1906	26.6048	27.7914	26.821	29.9468	25.3494	28.1283	27.376	28.0151	25.4163	27.5425	26.6709	26.034	25.9856	25.7459	25.6818	26.8313	1.20027
12	50.36	167.6	7.26072	7.28038	11.7698	9.20105	11.044	6.85698	9.71719	3.55375	7.08418	8.95982	7.71751	6.47543	7.22217	8.00961	5.63235	7.29815	7.81769	1.94205
13	51.2	167.77	6.76544	6.58179	10.8894	8.99928	10.8417	6.58263	9.40266	2.92964	7.1423	8.84782	7.58456	6.36272	7.11476	7.57997	5.19649	6.97711	7.48739	1.94634
14	69.25	12.7	nan	10.5763	10.5272	nan	nan	10.184	11.7029	6.96543	10.8206	10.8516	nan	nan	9.62954	2.95667	4.95937	9.85779	9.00285	2.66948
15	78.59	3.07	-0.626854	0.828586	-0.149394	1.97833	3.02911	7.27707	4.52491	3.28221	1.46825	2.05271	0.450207	0.112517	1.47967	-1.68853	0.74093	-0.25052	1.53182	2.13728
16	4.2	-43.49	28.2385	28.83	29.2762	28.6229	30.8884	28.9287	29.1059	28.8179	29.9156	28.2958	28.079	27.2219	27.5429	27.8094	27.139	27.9551	28.5417	0.9527
17	24	-20	22.7275	22.9962	25.307	23.264	26.8641	24.6021	25.2966	21.6018	25.7304	22.7063	22.4051	21.2212	23.3773	21.7896	23.3972	23.2822	23.5355	1.55138
18	36.23	-2.05	nan	21.5845	nan	nan	nan	21.2827	23.4186	20.8211	nan	nan	21.8764	20.6416	nan	14.3088	18.7188	nan	20.3316	2.58845
19	57.52	-15.87	14.6116	14.837	16.0811	16.1888	17.7358	13.2698	15.9613	11.6837	16.2947	14.0074	11.2426	11.2061	13.3707	8.19525	11.6215	15.5349	13.8651	2.4544
20	12.75	-78.73	26.9313	27.1851	28.2367	28.3385	30.1949	30.0822	28.6612	27.8469	28.1512	28.1133	26.4096	25.7042	27.9366	28.4087	25.7495	27.3848	27.8334	1.23989
21	29.97	-118.1	20.0078	20.007	23.46	20.6882	23.2491	nan	21.3322	19.5481	20.7939	21.0589	22.9988	21.0771	22.6357	21.8191	21.3452	21.3175	21.4226	1.16422
22	36.99	-123.28	nan	16.1257	19.002	nan	nan	nan	17.356	nan	16.6734	18.048	nan	nan	nan	16.8819	nan	18.2735	17.4801	0.935524
23	28.25	-74.41	26.8112	26.9142	28.4286	27.485	29.0097	27.2945	27.2735	25.903	28.1251	26.0921	26.0986	25.4359	26.5555	26.5759	25.3355	26.9185	26.8911	1.00116
24	39.23	-72.28	22.9235	23.4905	24.9337	24.194	24.8642	23.0706	24.6905	20.6433	17.3357	23.3902	22.742	22.6413	19.3896	19.8946	nan	23.7822	22.5324	2.15632
25	-19.62	11.32	24.737	25.575	27.6347	25.1237	26.7092	nan	26.7987	23.0029	25.25	23.7515	nan	nan	25.4092	24.8068	nan	26.4996	25.4415	1.26613
26	-21.1	11.82	23.5879	24.2189	26.6575	24.215	25.4181	nan	26.0361	22.5268	23.5534	23.1328	19.9108	19.9872	23.5029	23.7276	nan	25.6551	23.7236	1.91647
27	-25.52	13.03	20.9787	21.4065	24.355	21.9865	22.8551	22.5467	23.9181	20.2653	nan	20.5672	18.4692	17.5905	20.8886	20.2082	20.1514	23.2197	21.2938	1.83471
28	-31.47	15.32	20.2292	20.591	22.1178	20.8982	21.6257	nan	23.0116	19.1303	21.5467	20.8557	18.2602	16.4067	17.0715	17.0691	nan	20.7114	19.9661	1.97994
29	-41.13	13.57	15.6182	16.0145	18.1617	16.7916	17.2376	12.9596	18.4719	14.7709	14.6844	14.2744	9.3797	8.72826	9.56158	10.0992	12.4771	16.7916	14.1264	3.14644
30	-9.19	151.57	29.6261	30.1123	31.2553	29.9292	31.7511	nan	31.0982	28.6184	nan	29.745	30.159	29.4252	28.8061	28.9737	28.3679	29.7097	29.827	0.968894
31	-42.55	-178.17	17.4158	17.9903	19.4512	18.2371	19.6092	16.7491	19.751	15.8675	18.2952	15.9997	14.9269	13.174	14.6488	12.9868	14.9984	18.3404	16.7776	2.13121
32	9.37	113.28	29.5515	30.2037	30.7788	30.3923	31.8142	29.1973	30.723	29.3657	31.6541	29.7516	29.2585	28.188	29.0569	28.1081	28.5185	29.4053	29.748	1.07516
33	19.46	116.27	nan	28.8874	29.5052	nan	nan	nan	29.3937	nan	30.3317	28.0437	27.2699	26.3762	nan	27.0328	26.4587	28.0415	28.1341	1.2937
34	5.85	-86.45	27.8438	28.0809	28.2261	28.9442	31.7906	29.741	30.0992	28.8454	30.442	27.8505	28.7989	28.1314	28.5142	28.1846	27.4463	27.7778	28.7948	1.13696
35	49.88	-24.24	15.6255	17.5886	19.0776	16.8754	18.6853	11.0567	18.766	14.4633	13.7717	13.5412	14.3248	10.6643	12.4439	9.64849	14.3244	17.9474	14.9253	2.93636
36	41	-32.95	21.5929	21.0666	23.3912	22.5348	24.2815	16.5641	22.6421	18.2891	17.4595	19.7304	19.5739	17.4388	19.2932	17.7277	18.8701	22.7818	20.2023	2.35765
37	39.49	134.44	16.8655	18.3666	17.0618	17.638	20.145	18.6582	14.7544	12.7294	17.6298	15.3468	15.8765	14.0454	20.2091	18.2948	nan	16.5896	16.9474	2.05655

## Sheet: E280
site	lat	lon	CCSM4	CCSM4-UoT	CCSM4-Utr	CESM1.2	CESM2	COSMOS	EC-Earth3.3	GISS2.1G	HadCM3	IPSLCM6A	IPSLCM5A2	IPSLCM5A	MIROC4m	MRI2.3	NorESM-L	NorESM1-F	MMM	MM-SD	HadISST	NOAAERSST5
1	43.35	13.34	nan	15.8218	nan	nan	nan	nan	nan	nan	nan	nan	nan	nan	14.6129	nan	nan	nan	15.2174	0.604444	17.3618	17.2262
2	-40.51	167.67	15.3722	15.2474	16.3981	14.7635	14.9557	11.6931	16.3634	14.8109	15.6902	13.6911	11.9351	10.3942	12.0673	14.3549	12.7902	16.1361	14.1665	1.80126	15.0279	15.4852
3	-45.52	174.95	10.9622	11.1675	12.9379	11.3012	11.1377	10.4519	12.664	9.97818	11.0616	10.1248	9.01105	8.43593	8.24537	11.6817	nan	12.0599	10.7481	1.35481	10.8677	10.6644
4	41	-32.97	19.0635	18.803	19.8968	18.9757	19.4015	14.7785	16.7911	16.4733	16.8532	15.8696	15.7266	13.9343	17.3701	11.2689	16.616	21.4062	17.0768	2.44434	12.5488	17.7637
5	49.88	-24.23	12.0625	12.0907	9.3441	13.1608	12.6534	7.95087	10.8754	12.4796	10.7864	9.52113	10.8091	8.72455	11.1371	3.27155	11.9596	15.1569	10.749	2.60231	5.93564	13.3452
6	28.83	-87.16	24.7068	23.9363	25.8106	24.6321	25.4307	25.3405	24.0037	24.0889	nan	23.9325	24.8644	23.8236	25.1958	24.7002	23.2624	25.667	24.6263	0.73821	23.0381	25.2987
7	67.23	2.93	7.10793	3.8949	3.49907	7.83567	7.55301	5.54046	3.98723	2.63326	7.41937	6.67409	4.00322	2.05362	7.18473	1.94254	2.32657	7.56787	5.07647	2.17219	7.15905	6.78067
8	-1.39	-11.74	27.0407	26.9543	27.4219	25.9546	27.2016	28.1407	26.1425	28.0133	27.6034	25.3642	26.512	25.6972	25.798	27.6123	25.5075	27.1444	26.7568	0.883035	28.37	25.3126
9	1.2	-84.73	26.0949	24.8007	25.8792	25.6952	26.7692	27.0671	25.9479	26.5641	28.1826	25.1919	27.5258	27.0269	25.6211	27.655	25.8654	26.1739	26.3788	0.902791	28.2388	26.1163
10	16.62	59.8	25.6785	25.7678	26.1206	25.3603	26.57	25.4635	24.8799	27.4247	26.0566	24.8269	25.2802	24.1006	24.8977	25.0576	24.4038	26.1959	25.5053	0.819946	26.1384	26.0965
11	-3.1	-90.82	24.822	24.4195	25.0561	24.0372	24.8606	23.4063	24.9746	26.0614	26.7617	23.0374	25.9753	24.996	23.4889	24.9911	24.4067	24.4269	24.7326	0.958899	28.6636	23.7775
12	50.36	167.6	4.42276	3.95225	5.04019	5.0018	6.19697	3.37933	4.18812	1.89719	4.79915	6.14584	5.84741	4.3973	4.71656	4.66797	4.3608	5.45608	4.65436	1.03407	5.38291	5.64228
13	51.2	167.77	3.99398	3.14885	4.24676	4.75987	5.97308	3.13576	4.06404	1.37751	4.73867	6.00316	5.68134	4.2941	4.57485	3.79801	3.82289	5.17556	4.29928	1.13764	5.31405	5.41405
14	69.25	12.7	7.3282	5.38586	4.7083	7.91313	7.83813	7.70942	4.92184	4.1265	8.4741	7.41342	nan	nan	6.58256	0.564134	3.3202	7.95525	6.01722	2.19497	7.13468	6.33144
15	78.59	3.07	-1.7558	-1.6461	-1.74266	-1.65523	-1.6321	-0.149973	-1.76221	-1.37672	2.15795	-1.22849	-1.49552	-1.7311	-0.401018	-1.67461	-1.02157	0.433553	-1.0426	1.04462	1.54697	0.50153
16	4.2	-43.49	26.8058	26.6099	26.9057	26.5019	28.0867	26.9859	26.2664	27.9481	28.1112	26.2248	26.625	25.7546	25.815	26.8292	26.2089	26.8907	26.7856	0.703922	28.3588	27.3129
17	24	-20	21.2361	20.2221	21.6423	20.5365	23.523	21.9133	20.9829	21.2312	24.1804	19.37	19.3741	17.5336	21.4713	18.5394	21.6622	21.8765	20.9559	1.64745	25.3002	21.5137
18	36.23	-2.05	nan	18.4462	nan	nan	nan	nan	nan	19.5511	nan	nan	18.6161	16.6699	nan	17.6637	16.836	nan	17.9638	1.01767	17.6603	18.1022
19	57.52	-15.87	11.4628	8.99376	10.1378	12.3299	12.5886	10.1443	9.74257	9.22019	8.96487	9.83609	7.89094	6.8904	10.4517	4.6727	9.65281	12.4461	9.71409	2.00922	4.6426	10.6689
20	12.75	-78.73	25.6747	24.7059	25.7798	26.3619	27.4424	28.5143	25.6833	27.2768	27.32	25.8348	24.905	23.6644	26.098	27.9143	24.6795	26.2003	26.1285	1.26764	27.4972	27.585
21	29.97	-118.1	19.7204	20.105	21.4804	18.7076	19.6467	24.2059	18.1668	18.7709	18.454	19.1139	22.1772	19.9447	20.6242	18.1036	20.2143	20.7419	20.0111	1.56397	22.326	17.0824
22	36.99	-123.28	nan	15.5656	16.9282	nan	nan	nan	14.3137	14.7743	15.1061	15.9568	nan	nan	nan	13.4657	nan	17.9181	15.5036	1.33825	17.6603	13.9715
23	28.25	-74.41	25.305	25.1488	26.0826	25.0595	25.7594	24.65	23.6053	24.787	24.7646	23.6298	24.304	23.1282	24.4903	25.1351	24.5039	25.9796	24.7708	0.811824	23.0381	25.2217
24	39.23	-72.28	21.7544	22.3432	22.4725	21.5197	21.5545	nan	19.5175	19.3341	18.2669	19.4235	20.8667	19.7063	17.5864	17.0391	nan	22.8665	20.3037	1.80822	14.7993	13.4566
25	-19.62	11.32	23.2971	23.3504	24.9699	22.1341	23.0844	nan	22.5202	22.5909	24.8501	21.363	nan	nan	23.6939	23.7436	nan	25.2349	23.4027	1.13401	18.0662	16.0886
26	-21.1	11.82	22.1578	22.585	23.9971	21.252	21.9814	25.1281	22.0282	21.9752	23.4684	20.9546	19.2685	18.6867	22.2405	22.7076	nan	24.4735	22.1936	1.68333	18.0516	16.508
27	-25.52	13.03	19.4606	19.3232	21.267	19.0499	19.6564	22.718	20.5053	19.9897	nan	18.1194	17.1086	15.8803	19.6317	19.3125	18.6334	21.9686	19.5083	1.68547	16.4107	16.2502
28	-31.47	15.32	18.6897	18.243	19.2869	18.1731	17.9943	nan	20.2842	18.112	18.7711	18.8227	16.4174	14.4728	16.07	16.3313	nan	19.6748	17.9531	1.53417	17.3431	16.9291
29	-41.13	13.57	13.4151	13.3978	14.4345	13.108	12.7207	12.3565	14.7698	12.1856	12.2114	11.3933	8.21865	7.81493	7.97003	9.37278	9.93272	15.12	11.7764	2.34574	12.1205	11.6268
30	-9.19	151.57	27.9	28.3821	28.2138	27.37	28.7344	28.643	27.5496	27.8404	29.9012	27.5501	28.7082	27.78	27.91	27.8861	27.8457	28.3135	28.158	0.606754	28.0795	28.005
31	-42.55	-178.17	15.3243	15.2108	16.1335	14.871	15.3317	15.2	16.458	14.1864	17.8068	14.436	13.4136	11.5205	13.736	13.9475	13.4166	16.5971	14.8494	1.47074	13.9027	14.5355
32	9.37	113.28	27.7811	27.8485	27.7073	27.7972	28.7071	27.8183	26.9048	28.2467	29.9332	27.9501	28.0547	26.8676	28.1051	27.5487	27.3442	27.9405	27.9097	0.68619	28.0629	28.44
33	19.46	116.27	26.4818	26.7031	26.3536	26.4966	27.4124	26.7535	26.0435	27.29	29.572	25.9879	26.0186	24.6784	26.1264	26.9704	25.2388	26.7409	26.5542	1.03091	26.2927	25.9849
34	5.85	-86.45	26.8225	25.3761	26.5509	26.8213	28.213	28.001	27.8397	27.8642	28.9062	26.1993	27.4948	26.7569	26.491	28.0455	26.4933	26.5771	27.1533	0.895055	28.3233	27.7322
35	49.88	-24.24	12.0625	12.0907	9.3441	13.1608	12.6534	7.95087	10.8754	12.4796	10.7864	9.52113	10.8091	8.72455	11.1371	3.27155	11.9596	15.1569	10.749	2.60231	5.93564	13.3452
36	41	-32.95	19.0635	18.803	19.8968	18.9757	19.4015	14.7785	16.7911	16.4733	16.8532	15.8696	15.7266	13.9343	17.3701	11.2689	16.616	21.4062	17.0768	2.44434	12.5488	17.7637
37	39.49	134.44	14.1477	15.8566	14.9259	13.9799	15.0173	19.1417	15.429	12.2866	11.2333	10.9406	13.6336	10.6273	18.1689	17.5	nan	16.1565	14.603	2.50502	13.2229	12.7676

## Sheet: EOI400-E280
site	lat	lon	CCSM4	CCSM4-UoT	CCSM4-Utr	CESM1.2	CESM2	COSMOS	EC-Earth3.3	GISS2.1G	HadCM3	IPSLCM6A	IPSLCM5A2	IPSLCM5A	MIROC4m	MRI2.3	NorESM-L	NorESM1-F	MMM	MM-SD
1	43.35	13.34	nan	nan	nan	nan	nan	nan	nan	nan	nan	nan	nan	nan	3.55091	nan	nan	nan	3.55091	0
2	-40.51	167.67	2.15341	3.06208	3.33411	3.30034	4.67437	0.456395	2.52165	1.36052	1.58133	1.49324	1.08405	1.2136	0.21989	-0.803007	1.89997	1.36283	1.80717	1.31279
3	-45.52	174.95	2.75439	3.34942	3.52568	3.58873	4.88711	-1.44458	2.34852	2.01541	2.69409	1.94969	0.518341	0.395372	1.41973	-0.691955	nan	1.194	1.90026	1.65131
4	41	-32.97	2.52937	2.26359	3.49439	3.5591	4.87998	1.78558	5.85107	1.8158	0.606276	3.86072	3.8473	3.50447	1.92306	6.4588	2.25414	1.37556	3.12557	1.56864
5	49.88	-24.23	3.56303	5.49794	9.73352	3.7146	6.03194	3.10587	7.89056	1.98367	2.98525	4.02008	3.51575	1.93975	1.30673	6.37694	2.36485	2.79045	4.17631	2.25793
6	28.83	-87.16	1.37225	2.77109	2.51347	2.07815	3.05082	nan	3.61042	0.453774	nan	2.01217	1.36257	1.76275	2.82655	1.56032	0.722273	1.17671	1.94809	0.884745
7	67.23	2.93	2.68871	6.23501	6.1365	3.23635	4.65905	5.05754	8.17113	4.19784	3.12578	3.76814	3.40414	4.16626	2.47068	3.81301	3.9292	0.990995	4.12815	1.64362
8	-1.39	-11.74	1.44712	2.15762	2.97401	2.7166	4.13164	1.26475	3.43121	0.774602	1.54125	1.93853	1.32006	1.37553	2.06382	0.996245	1.53099	1.14557	1.9256	0.914014
9	1.2	-84.73	1.14643	2.23173	2.22216	2.38714	4.24846	1.68971	3.48402	1.18861	1.99708	2.14967	1.28329	1.48454	2.13441	0.467216	1.31666	0.97623	1.90046	0.919234
10	16.62	59.8	1.51247	2.01891	3.34088	3.03184	3.68441	2.24105	3.78859	0.955139	2.20907	2.54514	2.10709	2.11915	2.75733	1.89028	1.66069	1.33691	2.32493	0.794689
11	-3.1	-90.82	1.36866	2.1853	2.73532	2.78383	5.0862	1.94314	3.15377	1.31461	1.25337	2.37886	1.56712	1.67491	2.5451	0.99457	1.33918	1.2549	2.09868	1.00172
12	50.36	167.6	2.83796	3.32812	6.72965	4.19925	4.84702	3.47766	5.52907	1.65656	2.28503	2.81398	1.8701	2.07813	2.50561	3.34164	1.27155	1.84207	3.16334	1.46326
13	51.2	167.77	2.77145	3.43295	6.64263	4.23941	4.86858	3.44687	5.33862	1.55214	2.40363	2.84465	1.90322	2.06862	2.53991	3.78196	1.3736	1.80155	3.18811	1.4381
14	69.25	12.7	nan	5.19043	5.81894	nan	nan	2.47457	6.7811	2.83893	2.34648	3.43814	nan	nan	3.04698	2.39254	1.63917	1.90254	3.44271	1.63022
15	78.59	3.07	1.12894	2.47469	1.59326	3.63356	4.66121	7.42704	6.28712	4.65893	-0.689705	3.2812	1.94573	1.84361	1.88069	-0.0139264	1.7625	-0.684073	2.57442	2.24662
16	4.2	-43.49	1.43269	2.22008	2.3705	2.12103	2.8017	1.94275	2.8395	0.869871	1.80442	2.07098	1.45406	1.46729	1.72791	0.980182	0.930099	1.06434	1.75609	0.610204
17	24	-20	1.49139	2.77416	3.66475	2.72747	3.34105	2.68876	4.3137	0.370594	1.54995	3.33634	3.031	3.6876	1.90598	3.2502	1.73507	1.40571	2.57961	1.02953
18	36.23	-2.05	nan	3.13824	nan	nan	nan	nan	nan	1.26999	nan	nan	3.26025	3.97166	nan	-3.35486	1.88278	nan	1.69468	2.43013
19	57.52	-15.87	3.14879	5.84322	5.94326	3.85889	5.14722	3.12551	6.21873	2.46351	7.32988	4.17134	3.35165	4.31574	2.91897	3.52255	1.96872	3.08887	4.15105	1.47707
20	12.75	-78.73	1.25659	2.47921	2.45694	1.97655	2.75256	1.56787	2.97797	0.570117	0.831142	2.27853	1.50452	2.0398	1.83858	0.49443	1.07003	1.18448	1.70496	0.744418
21	29.97	-118.1	0.287362	-0.0980253	1.97964	1.98066	3.6024	nan	3.16539	0.777241	2.33993	1.94501	0.821605	1.13242	2.01148	3.71551	1.13086	0.575651	1.69114	1.13469
22	36.99	-123.28	nan	0.56009	2.07384	nan	nan	nan	3.0423	nan	1.56731	2.0912	nan	nan	nan	3.41619	nan	0.355367	1.87233	1.06617
23	28.25	-74.41	1.50616	1.76533	2.34597	2.4255	3.2503	2.64453	3.6682	1.116	3.36048	2.46225	1.79452	2.30774	2.06524	1.44084	0.831598	0.938933	2.12022	0.826169
24	39.23	-72.28	1.16909	1.1473	2.46124	2.67436	3.3097	nan	5.17299	1.30915	-0.93124	3.96671	1.87527	2.93502	1.8032	2.85551	nan	0.915731	2.19029	1.44259
25	-19.62	11.32	1.4399	2.22462	2.66477	2.98954	3.62483	nan	4.27844	0.411979	0.399914	2.38856	nan	nan	1.71526	1.06316	nan	1.26466	2.0388	1.16659
26	-21.1	11.82	1.43009	1.63397	2.66044	2.963	3.43674	nan	4.00787	0.551558	0.085041	2.17818	0.642286	1.30053	1.26235	1.02002	nan	1.18159	1.73955	1.11073
27	-25.52	13.03	1.51811	2.08332	3.08795	2.93656	3.19872	-0.171367	3.41278	0.275593	nan	2.44779	1.36064	1.71024	1.25686	0.895703	1.51796	1.25119	1.78547	1.03244
28	-31.47	15.32	1.53949	2.34806	2.83095	2.72507	3.63132	nan	2.72745	1.01829	2.77562	2.03296	1.84286	1.93385	1.00144	0.737805	nan	1.03653	2.01298	0.838854
29	-41.13	13.57	2.20312	2.61674	3.72721	3.68356	4.51695	0.603094	3.70217	2.58532	2.47301	2.88103	1.16105	0.913326	1.59155	0.726442	2.54436	1.67164	2.35004	1.14244
30	-9.19	151.57	1.72615	1.73014	3.04157	2.55923	3.01668	nan	3.54861	0.778049	nan	2.19496	1.45084	1.64519	0.896089	1.08761	0.522207	1.39626	1.82811	0.891296
31	-42.55	-178.17	2.09152	2.77946	3.31766	3.36608	4.27749	1.54911	3.29298	1.68113	0.488392	1.56366	1.51327	1.65355	0.912828	-0.960737	1.58181	1.74324	1.92822	1.2329
32	9.37	113.28	1.77038	2.35521	3.07143	2.59504	3.10706	1.37903	3.81816	1.11893	1.72096	1.80147	1.20384	1.32032	0.951777	0.559473	1.17434	1.46478	1.83826	0.877167
33	19.46	116.27	nan	2.18426	3.1516	nan	nan	nan	3.35018	nan	0.759625	2.05574	1.25137	1.69785	nan	0.0623714	1.2199	1.3006	1.70335	0.966883
34	5.85	-86.45	1.02134	2.70479	1.67517	2.12299	3.57763	1.73994	2.2595	0.981281	1.53577	1.65125	1.30407	1.37452	2.02324	0.139175	0.953002	1.20075	1.64152	0.774259
35	49.88	-24.24	3.56303	5.49794	9.73352	3.7146	6.03194	3.10587	7.89056	1.98367	2.98525	4.02008	3.51575	1.93975	1.30673	6.37694	2.36485	2.79045	4.17631	2.25793
36	41	-32.95	2.52937	2.26359	3.49439	3.5591	4.87998	1.78558	5.85107	1.8158	0.606276	3.86072	3.8473	3.50447	1.92306	6.4588	2.25414	1.37556	3.12557	1.56864
37	39.49	134.44	2.7178	2.51001	2.13588	3.65815	5.12768	-0.483522	-0.674584	0.44287	6.39653	4.40622	2.24297	3.41805	2.0402	0.794821	nan	0.43312	2.34441	1.973

## Sheet: EOI400near
site	lat	lon	CCSM4	CCSM4-UoT	CCSM4-Utr	CESM1.2	CESM2	COSMOS	EC-Earth3.3	GISS2.1G	HadCM3	IPSLCM6A	IPSLCM5A2	IPSLCM5A	MIROC4m	MRI2.3	NorESM-L	NorESM1-F	MMM	MM-SD
1	43.35	13.34	19.8286	21.1984	22.4211	21.6139	23.486	20.5477	21.9566	17.7	22.2081	18.8389	17.5607	16.8293	18.1638	16.9316	18.3581	17.8489	19.7182	2.1297
2	-40.51	167.67	17.5256	18.3095	19.7322	18.0639	19.6301	12.1495	18.885	16.1714	17.2715	15.1844	13.0191	11.6078	12.2872	13.5519	14.6902	17.4989	15.9736	2.69716
3	-45.52	174.95	13.7166	14.5169	16.4636	14.8899	16.0248	9.00731	15.0125	11.9936	13.7557	12.0745	9.52939	8.8313	9.6651	10.9897	11.7846	13.2539	12.5943	2.41686
4	41	-32.97	21.5929	21.0666	23.3912	22.5348	24.2815	16.5641	22.6421	18.2891	17.4595	19.7304	19.5739	17.4388	19.2932	17.7277	18.8701	22.7818	20.2023	2.35765
5	49.88	-24.23	15.6255	17.5886	19.0776	16.8754	18.6853	11.0567	18.766	14.4633	13.7717	13.5412	14.3248	10.6643	12.4439	9.64849	14.3244	17.9474	14.9253	2.93636
6	28.83	-87.16	26.079	26.7074	28.3241	26.7102	28.4815	28.311	27.6141	24.5426	28.0865	25.9447	26.227	25.5863	28.0224	26.2605	23.9847	26.8437	26.7328	1.31238
7	67.23	2.93	9.79664	10.1299	9.63557	11.072	12.2121	10.598	12.1584	6.83109	10.5451	10.4422	7.40737	6.21988	9.6554	5.75556	6.25578	8.55886	9.20462	2.04486
8	-1.39	-11.74	28.4878	29.1119	30.3959	28.6712	31.3332	29.4055	29.5738	28.7879	29.1447	27.3027	27.8321	27.0728	27.8618	28.6086	27.0385	28.29	28.6824	1.13139
9	1.2	-84.73	27.2413	27.0324	28.1013	28.0824	31.0177	28.7568	29.4319	27.7527	30.1797	27.3416	28.8091	28.5114	27.7555	28.1222	27.182	27.1501	28.2793	1.10788
10	16.62	59.8	27.191	27.7868	29.4615	28.3921	30.2544	27.7045	28.6685	28.3799	28.2657	27.3721	27.3873	26.2198	27.655	26.9478	26.0645	27.5328	27.8302	1.04551
11	-3.1	-90.82	26.1906	26.6048	27.7914	26.821	29.9468	25.3494	28.1283	27.376	28.0151	25.4163	27.5425	26.6709	26.034	25.9856	25.7459	25.6818	26.8313	1.20027
12	50.36	167.6	7.26072	7.28038	11.7698	9.20105	11.044	6.85698	9.71719	3.55375	7.08418	8.95982	7.71751	6.47543	7.22217	8.00961	5.63235	7.29815	7.81769	1.94205
13	51.2	167.77	6.76544	6.58179	10.8894	8.99928	10.8417	6.58263	9.40266	2.92964	7.1423	8.84782	7.58456	6.36272	7.11476	7.57997	5.19649	6.97711	7.48739	1.94634
14	69.25	12.7	9.33315	10.5763	10.5272	10.5292	12.0304	10.184	11.7029	6.96543	10.8206	10.8516	7.10061	5.68095	9.62954	2.95667	4.95937	9.85779	8.98161	2.55733
15	78.59	3.07	-0.626854	0.828586	-0.149394	1.97833	3.02911	7.27707	4.52491	3.28221	1.46825	2.05271	0.450207	0.112517	1.47967	-1.68853	0.74093	-0.25052	1.53182	2.13728
16	4.2	-43.49	28.2385	28.83	29.2762	28.6229	30.8884	28.9287	29.1059	28.8179	29.9156	28.2958	28.079	27.2219	27.5429	27.8094	27.139	27.9551	28.5417	0.9527
17	24	-20	22.7275	22.9962	25.307	23.264	26.8641	24.6021	25.2966	21.6018	25.7304	22.7063	22.4051	21.2212	23.3773	21.7896	23.3972	23.2822	23.5355	1.55138
18	36.23	-2.05	21.0343	21.5845	23.6084	22.7132	24.3406	21.2827	23.4186	20.8211	18.8379	21.4757	21.8764	20.6416	20.0096	14.3088	18.7188	22.7084	21.0863	2.32858
19	57.52	-15.87	14.6116	14.837	16.0811	16.1888	17.7358	13.2698	15.9613	11.6837	16.2947	14.0074	11.2426	11.2061	13.3707	8.19525	11.6215	15.5349	13.8651	2.4544
20	12.75	-78.73	26.9313	27.1851	28.2367	28.3385	30.1949	30.0822	28.6612	27.8469	28.1512	28.1133	26.4096	25.7042	27.9366	28.4087	25.7495	27.3848	27.8334	1.23989
21	29.97	-118.1	20.0078	20.007	23.46	20.6882	23.2491	26.3379	21.3322	19.5481	20.7939	21.0589	22.9988	21.0771	22.6357	21.8191	21.3452	21.3175	21.7298	1.63901
22	36.99	-123.28	16.1569	16.1257	19.002	18.0431	20.1363	17.9888	17.356	14.9608	16.6734	18.048	17.6967	16.4428	17.7823	16.8819	17.4256	18.2735	17.4371	1.20007
23	28.25	-74.41	26.8112	26.9142	28.4286	27.485	29.0097	27.2945	27.2735	25.903	28.1251	26.0921	26.0986	25.4359	26.5555	26.5759	25.3355	26.9185	26.8911	1.00116
24	39.23	-72.28	22.9235	23.4905	24.9337	24.194	24.8642	23.0706	24.6905	20.6433	17.3357	23.3902	22.742	22.6413	19.3896	19.8946	17.4667	23.7822	22.2158	2.4213
25	-19.62	11.32	24.737	25.575	27.6347	25.1237	26.7092	26.5734	26.7987	23.0029	25.25	23.7515	22.8159	22.6194	25.4092	24.8068	24.163	26.4996	25.0919	1.48018
26	-21.1	11.82	23.5879	24.2189	26.6575	24.215	25.4181	24.5793	26.0361	22.5268	23.5534	23.1328	19.9108	19.9872	23.5029	23.7276	22.8344	25.6551	23.7215	1.81904
27	-25.52	13.03	20.9787	21.4065	24.355	21.9865	22.8551	22.5467	23.9181	20.2653	20.7923	20.5672	18.4692	17.5905	20.8886	20.2082	20.1514	23.2197	21.2624	1.78059
28	-31.47	15.32	20.2292	20.591	22.1178	20.8982	21.6257	19.5952	23.0116	19.1303	21.5467	20.8557	18.2602	16.4067	17.0715	17.0691	17.1778	20.7114	19.7686	1.97121
29	-41.13	13.57	15.6182	16.0145	18.1617	16.7916	17.2376	12.9596	18.4719	14.7709	14.6844	14.2744	9.3797	8.72826	9.56158	10.0992	12.4771	16.7916	14.1264	3.14644
30	-9.19	151.57	29.6261	30.1123	31.2553	29.9292	31.7511	30.8722	31.0982	28.6184	31.3581	29.745	30.159	29.4252	28.8061	28.9737	28.3679	29.7097	29.988	1.00513
31	-42.55	-178.17	17.4158	17.9903	19.4512	18.2371	19.6092	16.7491	19.751	15.8675	18.2952	15.9997	14.9269	13.174	14.6488	12.9868	14.9984	18.3404	16.7776	2.13121
32	9.37	113.28	29.5515	30.2037	30.7788	30.3923	31.8142	29.1973	30.723	29.3657	31.6541	29.7516	29.2585	28.188	29.0569	28.1081	28.5185	29.4053	29.748	1.07516
33	19.46	116.27	28.6211	28.8874	29.5052	29.2564	30.6719	28.5773	29.3937	28.1079	30.3317	28.0437	27.2699	26.3762	29.1382	27.0328	26.4587	28.0415	28.4821	1.22325
34	5.85	-86.45	27.8438	28.0809	28.2261	28.9442	31.7906	29.741	30.0992	28.8454	30.442	27.8505	28.7989	28.1314	28.5142	28.1846	27.4463	27.7778	28.7948	1.13696
35	49.88	-24.24	15.6255	17.5886	19.0776	16.8754	18.6853	11.0567	18.766	14.4633	13.7717	13.5412	14.3248	10.6643	12.4439	9.64849	14.3244	17.9474	14.9253	2.93636
36	41	-32.95	21.5929	21.0666	23.3912	22.5348	24.2815	16.5641	22.6421	18.2891	17.4595	19.7304	19.5739	17.4388	19.2932	17.7277	18.8701	22.7818	20.2023	2.35765
37	39.49	134.44	16.8655	18.3666	17.0618	17.638	20.145	18.6582	14.7544	12.7294	17.6298	15.3468	15.8765	14.0454	20.2091	18.2948	12.0867	16.5896	16.6436	2.31289

## Sheet: E280near
site	lat	lon	CCSM4	CCSM4-UoT	CCSM4-Utr	CESM1.2	CESM2	COSMOS	EC-Earth3.3	GISS2.1G	HadCM3	IPSLCM6A	IPSLCM5A2	IPSLCM5A	MIROC4m	MRI2.3	NorESM-L	NorESM1-F	MMM	MM-SD	HadISST	NOAAERSST5
1	43.35	13.34	18.6471	15.8218	15.6215	19.0345	19.7351	16.5153	17.0497	17.4345	18.6226	14.5106	14.639	13.3191	14.6129	15.7294	16.5414	16.5801	16.5259	1.7696	17.3618	17.2262
2	-40.51	167.67	15.3722	15.2474	16.3981	14.7635	14.9557	11.6931	16.3634	14.8109	15.6902	13.6911	11.9351	10.3942	12.0673	14.3549	12.7902	16.1361	14.1665	1.80126	15.0279	15.4852
3	-45.52	174.95	10.9622	11.1675	12.9379	11.3012	11.1377	10.4519	12.664	9.97818	11.0616	10.1248	9.01105	8.43593	8.24537	11.6817	9.67124	12.0599	10.6808	1.33743	10.8677	10.6644
4	41	-32.97	19.0635	18.803	19.8968	18.9757	19.4015	14.7785	16.7911	16.4733	16.8532	15.8696	15.7266	13.9343	17.3701	11.2689	16.616	21.4062	17.0768	2.44434	12.5488	17.7637
5	49.88	-24.23	12.0625	12.0907	9.3441	13.1608	12.6534	7.95087	10.8754	12.4796	10.7864	9.52113	10.8091	8.72455	11.1371	3.27155	11.9596	15.1569	10.749	2.60231	5.93564	13.3452
6	28.83	-87.16	24.7068	23.9363	25.8106	24.6321	25.4307	25.3405	24.0037	24.0889	25.5611	23.9325	24.8644	23.8236	25.1958	24.7002	23.2624	25.667	24.6848	0.749728	23.0381	25.2987
7	67.23	2.93	7.10793	3.8949	3.49907	7.83567	7.55301	5.54046	3.98723	2.63326	7.41937	6.67409	4.00322	2.05362	7.18473	1.94254	2.32657	7.56787	5.07647	2.17219	7.15905	6.78067
8	-1.39	-11.74	27.0407	26.9543	27.4219	25.9546	27.2016	28.1407	26.1425	28.0133	27.6034	25.3642	26.512	25.6972	25.798	27.6123	25.5075	27.1444	26.7568	0.883035	28.37	25.3126
9	1.2	-84.73	26.0949	24.8007	25.8792	25.6952	26.7692	27.0671	25.9479	26.5641	28.1826	25.1919	27.5258	27.0269	25.6211	27.655	25.8654	26.1739	26.3788	0.902791	28.2388	26.1163
10	16.62	59.8	25.6785	25.7678	26.1206	25.3603	26.57	25.4635	24.8799	27.4247	26.0566	24.8269	25.2802	24.1006	24.8977	25.0576	24.4038	26.1959	25.5053	0.819946	26.1384	26.0965
11	-3.1	-90.82	24.822	24.4195	25.0561	24.0372	24.8606	23.4063	24.9746	26.0614	26.7617	23.0374	25.9753	24.996	23.4889	24.9911	24.4067	24.4269	24.7326	0.958899	28.6636	23.7775
12	50.36	167.6	4.42276	3.95225	5.04019	5.0018	6.19697	3.37933	4.18812	1.89719	4.79915	6.14584	5.84741	4.3973	4.71656	4.66797	4.3608	5.45608	4.65436	1.03407	5.38291	5.64228
13	51.2	167.77	3.99398	3.14885	4.24676	4.75987	5.97308	3.13576	4.06404	1.37751	4.73867	6.00316	5.68134	4.2941	4.57485	3.79801	3.82289	5.17556	4.29928	1.13764	5.31405	5.41405
14	69.25	12.7	7.3282	5.38586	4.7083	7.91313	7.83813	7.70942	4.92184	4.1265	8.4741	7.41342	3.22136	1.14618	6.58256	0.564134	3.3202	7.95525	5.53804	2.4408	7.13468	6.33144
15	78.59	3.07	-1.7558	-1.6461	-1.74266	-1.65523	-1.6321	-0.149973	-1.76221	-1.37672	2.15795	-1.22849	-1.49552	-1.7311	-0.401018	-1.67461	-1.02157	0.433553	-1.0426	1.04462	1.54697	0.50153
16	4.2	-43.49	26.8058	26.6099	26.9057	26.5019	28.0867	26.9859	26.2664	27.9481	28.1112	26.2248	26.625	25.7546	25.815	26.8292	26.2089	26.8907	26.7856	0.703922	28.3588	27.3129
17	24	-20	21.2361	20.2221	21.6423	20.5365	23.523	21.9133	20.9829	21.2312	24.1804	19.37	19.3741	17.5336	21.4713	18.5394	21.6622	21.8765	20.9559	1.64745	25.3002	21.5137
18	36.23	-2.05	18.5651	18.4462	19.8405	19.1103	19.5854	17.3524	12.8012	19.5511	16.4263	17.5535	18.6161	16.6699	17.0274	17.6637	16.836	21.2476	17.9558	1.85841	17.6603	18.1022
19	57.52	-15.87	11.4628	8.99376	10.1378	12.3299	12.5886	10.1443	9.74257	9.22019	8.96487	9.83609	7.89094	6.8904	10.4517	4.6727	9.65281	12.4461	9.71409	2.00922	4.6426	10.6689
20	12.75	-78.73	25.6747	24.7059	25.7798	26.3619	27.4424	28.5143	25.6833	27.2768	27.32	25.8348	24.905	23.6644	26.098	27.9143	24.6795	26.2003	26.1285	1.26764	27.4972	27.585
21	29.97	-118.1	19.7204	20.105	21.4804	18.7076	19.6467	24.2059	18.1668	18.7709	18.454	19.1139	22.1772	19.9447	20.6242	18.1036	20.2143	20.7419	20.0111	1.56397	22.326	17.0824
22	36.99	-123.28	15.7629	15.5656	16.9282	15.5767	16.2193	19.45	14.3137	14.7743	15.1061	15.9568	16.5222	15.267	14.6069	13.4657	16.3025	17.9181	15.8585	1.39209	17.6603	13.9715
23	28.25	-74.41	25.305	25.1488	26.0826	25.0595	25.7594	24.65	23.6053	24.787	24.7646	23.6298	24.304	23.1282	24.4903	25.1351	24.5039	25.9796	24.7708	0.811824	23.0381	25.2217
24	39.23	-72.28	21.7544	22.3432	22.4725	21.5197	21.5545	21.3639	19.5175	19.3341	18.2669	19.4235	20.8667	19.7063	17.5864	17.0391	16.997	22.8665	20.1633	1.89601	14.7993	13.4566
25	-19.62	11.32	23.2971	23.3504	24.9699	22.1341	23.0844	26.4357	22.5202	22.5909	24.8501	21.363	21.7191	20.9571	23.6939	23.7436	22.7197	25.2349	23.2915	1.45162	18.0662	16.0886
26	-21.1	11.82	22.1578	22.585	23.9971	21.252	21.9814	25.1281	22.0282	21.9752	23.4684	20.9546	19.2685	18.6867	22.2405	22.7076	21.4327	24.4735	22.1461	1.64025	18.0516	16.508
27	-25.52	13.03	19.4606	19.3232	21.267	19.0499	19.6564	22.718	20.5053	19.9897	19.9144	18.1194	17.1086	15.8803	19.6317	19.3125	18.6334	21.9686	19.5337	1.6349	16.4107	16.2502
28	-31.47	15.32	18.6897	18.243	19.2869	18.1731	17.9943	18.7173	20.2842	18.112	18.7711	18.8227	16.4174	14.4728	16.07	16.3313	15.6439	19.6748	17.8565	1.55561	17.3431	16.9291
29	-41.13	13.57	13.4151	13.3978	14.4345	13.108	12.7207	12.3565	14.7698	12.1856	12.2114	11.3933	8.21865	7.81493	7.97003	9.37278	9.93272	15.12	11.7764	2.34574	12.1205	11.6268
30	-9.19	151.57	27.9	28.3821	28.2138	27.37	28.7344	28.643	27.5496	27.8404	29.9012	27.5501	28.7082	27.78	27.91	27.8861	27.8457	28.3135	28.158	0.606754	28.0795	28.005
31	-42.55	-178.17	15.3243	15.2108	16.1335	14.871	15.3317	15.2	16.458	14.1864	17.8068	14.436	13.4136	11.5205	13.736	13.9475	13.4166	16.5971	14.8494	1.47074	13.9027	14.5355
32	9.37	113.28	27.7811	27.8485	27.7073	27.7972	28.7071	27.8183	26.9048	28.2467	29.9332	27.9501	28.0547	26.8676	28.1051	27.5487	27.3442	27.9405	27.9097	0.68619	28.0629	28.44
33	19.46	116.27	26.4818	26.7031	26.3536	26.4966	27.4124	26.7535	26.0435	27.29	29.572	25.9879	26.0186	24.6784	26.1264	26.9704	25.2388	26.7409	26.5542	1.03091	26.2927	25.9849
34	5.85	-86.45	26.8225	25.3761	26.5509	26.8213	28.213	28.001	27.8397	27.8642	28.9062	26.1993	27.4948	26.7569	26.491	28.0455	26.4933	26.5771	27.1533	0.895055	28.3233	27.7322
35	49.88	-24.24	12.0625	12.0907	9.3441	13.1608	12.6534	7.95087	10.8754	12.4796	10.7864	9.52113	10.8091	8.72455	11.1371	3.27155	11.9596	15.1569	10.749	2.60231	5.93564	13.3452
36	41	-32.95	19.0635	18.803	19.8968	18.9757	19.4015	14.7785	16.7911	16.4733	16.8532	15.8696	15.7266	13.9343	17.3701	11.2689	16.616	21.4062	17.0768	2.44434	12.5488	17.7637
37	39.49	134.44	14.1477	15.8566	14.9259	13.9799	15.0173	19.1417	15.429	12.2866	11.2333	10.9406	13.6336	10.6273	18.1689	17.5	9.8701	16.1565	14.3072	2.68243	13.2229	12.7676

## Sheet: EOI400-E280near
site	lat	lon	CCSM4	CCSM4-UoT	CCSM4-Utr	CESM1.2	CESM2	COSMOS	EC-Earth3.3	GISS2.1G	HadCM3	IPSLCM6A	IPSLCM5A2	IPSLCM5A	MIROC4m	MRI2.3	NorESM-L	NorESM1-F	MMM	MM-SD
1	43.35	13.34	1.18154	5.37659	6.79962	2.57937	3.75085	4.03239	4.90686	0.265501	3.58552	4.32823	2.9217	3.51018	3.55091	1.2022	1.81661	1.26882	3.19231	1.69608
2	-40.51	167.67	2.15341	3.06208	3.33411	3.30034	4.67437	0.456395	2.52165	1.36052	1.58133	1.49324	1.08405	1.2136	0.21989	-0.803007	1.89997	1.36283	1.80717	1.31279
3	-45.52	174.95	2.75439	3.34942	3.52568	3.58873	4.88711	-1.44458	2.34852	2.01541	2.69409	1.94969	0.518341	0.395372	1.41973	-0.691955	2.1134	1.194	1.91358	1.5997
4	41	-32.97	2.52937	2.26359	3.49439	3.5591	4.87998	1.78558	5.85107	1.8158	0.606276	3.86072	3.8473	3.50447	1.92306	6.4588	2.25414	1.37556	3.12557	1.56864
5	49.88	-24.23	3.56303	5.49794	9.73352	3.7146	6.03194	3.10587	7.89056	1.98367	2.98525	4.02008	3.51575	1.93975	1.30673	6.37694	2.36485	2.79045	4.17631	2.25793
6	28.83	-87.16	1.37225	2.77109	2.51347	2.07815	3.05082	2.97049	3.61042	0.453774	2.52544	2.01217	1.36257	1.76275	2.82655	1.56032	0.722273	1.17671	2.04808	0.872407
7	67.23	2.93	2.68871	6.23501	6.1365	3.23635	4.65905	5.05754	8.17113	4.19784	3.12578	3.76814	3.40414	4.16626	2.47068	3.81301	3.9292	0.990995	4.12815	1.64362
8	-1.39	-11.74	1.44712	2.15762	2.97401	2.7166	4.13164	1.26475	3.43121	0.774602	1.54125	1.93853	1.32006	1.37553	2.06382	0.996245	1.53099	1.14557	1.9256	0.914014
9	1.2	-84.73	1.14643	2.23173	2.22216	2.38714	4.24846	1.68971	3.48402	1.18861	1.99708	2.14967	1.28329	1.48454	2.13441	0.467216	1.31666	0.97623	1.90046	0.919234
10	16.62	59.8	1.51247	2.01891	3.34088	3.03184	3.68441	2.24105	3.78859	0.955139	2.20907	2.54514	2.10709	2.11915	2.75733	1.89028	1.66069	1.33691	2.32493	0.794689
11	-3.1	-90.82	1.36866	2.1853	2.73532	2.78383	5.0862	1.94314	3.15377	1.31461	1.25337	2.37886	1.56712	1.67491	2.5451	0.99457	1.33918	1.2549	2.09868	1.00172
12	50.36	167.6	2.83796	3.32812	6.72965	4.19925	4.84702	3.47766	5.52907	1.65656	2.28503	2.81398	1.8701	2.07813	2.50561	3.34164	1.27155	1.84207	3.16334	1.46326
13	51.2	167.77	2.77145	3.43295	6.64263	4.23941	4.86858	3.44687	5.33862	1.55214	2.40363	2.84465	1.90322	2.06862	2.53991	3.78196	1.3736	1.80155	3.18811	1.4381
14	69.25	12.7	2.00495	5.19043	5.81894	2.61608	4.19227	2.47457	6.7811	2.83893	2.34648	3.43814	3.87925	4.53476	3.04698	2.39254	1.63917	1.90254	3.44357	1.45622
15	78.59	3.07	1.12894	2.47469	1.59326	3.63356	4.66121	7.42704	6.28712	4.65893	-0.689705	3.2812	1.94573	1.84361	1.88069	-0.0139264	1.7625	-0.684073	2.57442	2.24662
16	4.2	-43.49	1.43269	2.22008	2.3705	2.12103	2.8017	1.94275	2.8395	0.869871	1.80442	2.07098	1.45406	1.46729	1.72791	0.980182	0.930099	1.06434	1.75609	0.610204
17	24	-20	1.49139	2.77416	3.66475	2.72747	3.34105	2.68876	4.3137	0.370594	1.54995	3.33634	3.031	3.6876	1.90598	3.2502	1.73507	1.40571	2.57961	1.02953
18	36.23	-2.05	2.46924	3.13824	3.76795	3.60292	4.7552	3.9303	10.6173	1.26999	2.41166	3.92229	3.26025	3.97166	2.98224	-3.35486	1.88278	1.46083	3.1305	2.64758
19	57.52	-15.87	3.14879	5.84322	5.94326	3.85889	5.14722	3.12551	6.21873	2.46351	7.32988	4.17134	3.35165	4.31574	2.91897	3.52255	1.96872	3.08887	4.15105	1.47707
20	12.75	-78.73	1.25659	2.47921	2.45694	1.97655	2.75256	1.56787	2.97797	0.570117	0.831142	2.27853	1.50452	2.0398	1.83858	0.49443	1.07003	1.18448	1.70496	0.744418
21	29.97	-118.1	0.287362	-0.0980253	1.97964	1.98066	3.6024	2.13199	3.16539	0.777241	2.33993	1.94501	0.821605	1.13242	2.01148	3.71551	1.13086	0.575651	1.71869	1.10383
22	36.99	-123.28	0.394034	0.56009	2.07384	2.46642	3.91694	-1.46114	3.0423	0.186529	1.56731	2.0912	1.17446	1.17584	3.17546	3.41619	1.12315	0.355367	1.57863	1.38024
23	28.25	-74.41	1.50616	1.76533	2.34597	2.4255	3.2503	2.64453	3.6682	1.116	3.36048	2.46225	1.79452	2.30774	2.06524	1.44084	0.831598	0.938933	2.12022	0.826169
24	39.23	-72.28	1.16909	1.1473	2.46124	2.67436	3.3097	1.70666	5.17299	1.30915	-0.93124	3.96671	1.87527	2.93502	1.8032	2.85551	0.469627	0.915731	2.05252	1.41478
25	-19.62	11.32	1.4399	2.22462	2.66477	2.98954	3.62483	0.137608	4.27844	0.411979	0.399914	2.38856	1.09681	1.66225	1.71526	1.06316	1.44329	1.26466	1.80035	1.1297
26	-21.1	11.82	1.43009	1.63397	2.66044	2.963	3.43674	-0.548759	4.00787	0.551558	0.085041	2.17818	0.642286	1.30053	1.26235	1.02002	1.40177	1.18159	1.57542	1.1777
27	-25.52	13.03	1.51811	2.08332	3.08795	2.93656	3.19872	-0.171367	3.41278	0.275593	0.877956	2.44779	1.36064	1.71024	1.25686	0.895703	1.51796	1.25119	1.72875	1.02351
28	-31.47	15.32	1.53949	2.34806	2.83095	2.72507	3.63132	0.877843	2.72745	1.01829	2.77562	2.03296	1.84286	1.93385	1.00144	0.737805	1.53389	1.03653	1.91209	0.836909
29	-41.13	13.57	2.20312	2.61674	3.72721	3.68356	4.51695	0.603094	3.70217	2.58532	2.47301	2.88103	1.16105	0.913326	1.59155	0.726442	2.54436	1.67164	2.35004	1.14244
30	-9.19	151.57	1.72615	1.73014	3.04157	2.55923	3.01668	2.22926	3.54861	0.778049	1.45691	2.19496	1.45084	1.64519	0.896089	1.08761	0.522207	1.39626	1.82998	0.844851
31	-42.55	-178.17	2.09152	2.77946	3.31766	3.36608	4.27749	1.54911	3.29298	1.68113	0.488392	1.56366	1.51327	1.65355	0.912828	-0.960737	1.58181	1.74324	1.92822	1.2329
32	9.37	113.28	1.77038	2.35521	3.07143	2.59504	3.10706	1.37903	3.81816	1.11893	1.72096	1.80147	1.20384	1.32032	0.951777	0.559473	1.17434	1.46478	1.83826	0.877167
33	19.46	116.27	2.13924	2.18426	3.1516	2.75988	3.25948	1.82376	3.35018	0.817906	0.759625	2.05574	1.25137	1.69785	3.01179	0.0623714	1.2199	1.3006	1.92785	0.961137
34	5.85	-86.45	1.02134	2.70479	1.67517	2.12299	3.57763	1.73994	2.2595	0.981281	1.53577	1.65125	1.30407	1.37452	2.02324	0.139175	0.953002	1.20075	1.64152	0.774259
35	49.88	-24.24	3.56303	5.49794	9.73352	3.7146	6.03194	3.10587	7.89056	1.98367	2.98525	4.02008	3.51575	1.93975	1.30673	6.37694	2.36485	2.79045	4.17631	2.25793
36	41	-32.95	2.52937	2.26359	3.49439	3.5591	4.87998	1.78558	5.85107	1.8158	0.606276	3.86072	3.8473	3.50447	1.92306	6.4588	2.25414	1.37556	3.12557	1.56864
37	39.49	134.44	2.7178	2.51001	2.13588	3.65815	5.12768	-0.483522	-0.674584	0.44287	6.39653	4.40622	2.24297	3.41805	2.0402	0.794821	2.21656	0.43312	2.33642	1.9106

## Sheet: EOI400distance
site	lat	lon	CCSM4	CCSM4-UoT	CCSM4-Utr	CESM1.2	CESM2	COSMOS	EC-Earth3.3	GISS2.1G	HadCM3	IPSLCM6A	IPSLCM5A2	IPSLCM5A	MIROC4m	MRI2.3	NorESM-L	NorESM1-F	MMM	MM-SD
1	43.35	13.34	3	2	2	3	3	4	3	1	1	1	1	1	0	2	3	1	1.9375	1.08793
2	-40.51	167.67	0	0	0	0	0	0	0	0	0	0	0	0	0	0	0	0	0	0
3	-45.52	174.95	0	0	0	0	0	0	0	0	0	0	0	0	0	0	1	0	0.0625	0.242061
4	41	-32.97	0	0	0	0	0	0	0	0	0	0	0	0	0	0	0	0	0	0
5	49.88	-24.23	0	0	0	0	0	0	0	0	0	0	0	0	0	0	0	0	0	0
6	28.83	-87.16	0	0	0	0	0	2	0	0	1	0	0	0	0	0	0	0	0.1875	0.526634
7	67.23	2.93	0	0	0	0	0	0	0	0	0	0	0	0	0	0	0	0	0	0
8	-1.39	-11.74	0	0	0	0	0	0	0	0	0	0	0	0	0	0	0	0	0	0
9	1.2	-84.73	0	0	0	0	0	0	0	0	0	0	0	0	0	0	0	0	0	0
10	16.62	59.8	0	0	0	0	0	0	0	0	0	0	0	0	0	0	0	0	0	0
11	-3.1	-90.82	0	0	0	0	0	0	0	0	0	0	0	0	0	0	0	0	0	0
12	50.36	167.6	0	0	0	0	0	0	0	0	0	0	0	0	0	0	0	0	0	0
13	51.2	167.77	0	0	0	0	0	0	0	0	0	0	0	0	0	0	0	0	0	0
14	69.25	12.7	1	0	0	1	1	0	0	0	0	0	1	1	0	0	0	0	0.3125	0.463512
15	78.59	3.07	0	0	0	0	0	0	0	0	0	0	0	0	0	0	0	0	0	0
16	4.2	-43.49	0	0	0	0	0	0	0	0	0	0	0	0	0	0	0	0	0	0
17	24	-20	0	0	0	0	0	0	0	0	0	0	0	0	0	0	0	0	0	0
18	36.23	-2.05	4	0	1	4	4	0	0	0	1	1	0	0	1	0	0	1	1.0625	1.4777
19	57.52	-15.87	0	0	0	0	0	0	0	0	0	0	0	0	0	0	0	0	0	0
20	12.75	-78.73	0	0	0	0	0	0	0	0	0	0	0	0	0	0	0	0	0	0
21	29.97	-118.1	0	0	0	0	0	1	0	0	0	0	0	0	0	0	0	0	0.0625	0.242061
22	36.99	-123.28	1	0	0	1	1	1	0	1	0	0	1	1	1	0	1	0	0.5625	0.496078
23	28.25	-74.41	0	0	0	0	0	0	0	0	0	0	0	0	0	0	0	0	0	0
24	39.23	-72.28	0	0	0	0	0	0	0	0	0	0	0	0	0	0	1	0	0.0625	0.242061
25	-19.62	11.32	0	0	0	0	0	1	0	0	0	0	1	1	0	0	1	0	0.25	0.433013
26	-21.1	11.82	0	0	0	0	0	2	0	0	0	0	0	0	0	0	2	0	0.25	0.661438
27	-25.52	13.03	0	0	0	0	0	0	0	0	1	0	0	0	0	0	0	0	0.0625	0.242061
28	-31.47	15.32	0	0	0	0	0	1	0	0	0	0	0	0	0	0	1	0	0.125	0.330719
29	-41.13	13.57	0	0	0	0	0	0	0	0	0	0	0	0	0	0	0	0	0	0
30	-9.19	151.57	0	0	0	0	0	3	0	0	1	0	0	0	0	0	0	0	0.25	0.75
31	-42.55	-178.17	0	0	0	0	0	0	0	0	0	0	0	0	0	0	0	0	0	0
32	9.37	113.28	0	0	0	0	0	0	0	0	0	0	0	0	0	0	0	0	0	0
33	19.46	116.27	1	0	0	1	1	2	0	1	0	0	0	0	1	0	0	0	0.4375	0.609175
34	5.85	-86.45	0	0	0	0	0	0	0	0	0	0	0	0	0	0	0	0	0	0
35	49.88	-24.24	0	0	0	0	0	0	0	0	0	0	0	0	0	0	0	0	0	0
36	41	-32.95	0	0	0	0	0	0	0	0	0	0	0	0	0	0	0	0	0	0
37	39.49	134.44	0	0	0	0	0	0	0	0	0	0	0	0	0	0	1	0	0.0625	0.242061

## Sheet: E280distance
site	lat	lon	CCSM4	CCSM4-UoT	CCSM4-Utr	CESM1.2	CESM2	COSMOS	EC-Earth3.3	GISS2.1G	HadCM3	IPSLCM6A	IPSLCM5A2	IPSLCM5A	MIROC4m	MRI2.3	NorESM-L	NorESM1-F	MMM	MM-SD	HadISST	NOAAERSST5
1	43.35	13.34	4	0	1	4	4	6	2	1	1	1	1	1	0	2	3	1	2	1.65831	0	0
2	-40.51	167.67	0	0	0	0	0	0	0	0	0	0	0	0	0	0	0	0	0	0	0	0
3	-45.52	174.95	0	0	0	0	0	0	0	0	0	0	0	0	0	0	1	0	0.0625	0.242061	0	0
4	41	-32.97	0	0	0	0	0	0	0	0	0	0	0	0	0	0	0	0	0	0	0	0
5	49.88	-24.23	0	0	0	0	0	0	0	0	0	0	0	0	0	0	0	0	0	0	0	0
6	28.83	-87.16	0	0	0	0	0	0	0	0	1	0	0	0	0	0	0	0	0.0625	0.242061	0	0
7	67.23	2.93	0	0	0	0	0	0	0	0	0	0	0	0	0	0	0	0	0	0	0	0
8	-1.39	-11.74	0	0	0	0	0	0	0	0	0	0	0	0	0	0	0	0	0	0	0	0
9	1.2	-84.73	0	0	0	0	0	0	0	0	0	0	0	0	0	0	0	0	0	0	0	0
10	16.62	59.8	0	0	0	0	0	0	0	0	0	0	0	0	0	0	0	0	0	0	0	0
11	-3.1	-90.82	0	0	0	0	0	0	0	0	0	0	0	0	0	0	0	0	0	0	0	0
12	50.36	167.6	0	0	0	0	0	0	0	0	0	0	0	0	0	0	0	0	0	0	0	0
13	51.2	167.77	0	0	0	0	0	0	0	0	0	0	0	0	0	0	0	0	0	0	0	0
14	69.25	12.7	0	0	0	0	0	0	0	0	0	0	1	1	0	0	0	0	0.125	0.330719	0	0
15	78.59	3.07	0	0	0	0	0	0	0	0	0	0	0	0	0	0	0	0	0	0	0	0
16	4.2	-43.49	0	0	0	0	0	0	0	0	0	0	0	0	0	0	0	0	0	0	0	0
17	24	-20	0	0	0	0	0	0	0	0	0	0	0	0	0	0	0	0	0	0	0	0
18	36.23	-2.05	4	0	1	4	4	1	1	0	1	1	0	0	1	0	0	1	1.1875	1.42385	0	0
19	57.52	-15.87	0	0	0	0	0	0	0	0	0	0	0	0	0	0	0	0	0	0	0	0
20	12.75	-78.73	0	0	0	0	0	0	0	0	0	0	0	0	0	0	0	0	0	0	0	0
21	29.97	-118.1	0	0	0	0	0	0	0	0	0	0	0	0	0	0	0	0	0	0	0	0
22	36.99	-123.28	1	0	0	1	1	1	0	0	0	0	1	1	1	0	1	0	0.5	0.5	0	0
23	28.25	-74.41	0	0	0	0	0	0	0	0	0	0	0	0	0	0	0	0	0	0	0	0
24	39.23	-72.28	0	0	0	0	0	1	0	0	0	0	0	0	0	0	1	0	0.125	0.330719	0	0
25	-19.62	11.32	0	0	0	0	0	1	0	0	0	0	1	1	0	0	1	0	0.25	0.433013	0	0
26	-21.1	11.82	0	0	0	0	0	0	0	0	0	0	0	0	0	0	2	0	0.125	0.484123	0	0
27	-25.52	13.03	0	0	0	0	0	0	0	0	1	0	0	0	0	0	0	0	0.0625	0.242061	0	0
28	-31.47	15.32	0	0	0	0	0	1	0	0	0	0	0	0	0	0	1	0	0.125	0.330719	0	0
29	-41.13	13.57	0	0	0	0	0	0	0	0	0	0	0	0	0	0	0	0	0	0	0	0
30	-9.19	151.57	0	0	0	0	0	0	0	0	0	0	0	0	0	0	0	0	0	0	0	0
31	-42.55	-178.17	0	0	0	0	0	0	0	0	0	0	0	0	0	0	0	0	0	0	0	0
32	9.37	113.28	0	0	0	0	0	0	0	0	0	0	0	0	0	0	0	0	0	0	0	0
33	19.46	116.27	0	0	0	0	0	0	0	0	0	0	0	0	0	0	0	0	0	0	0	0
34	5.85	-86.45	0	0	0	0	0	0	0	0	0	0	0	0	0	0	0	0	0	0	0	0
35	49.88	-24.24	0	0	0	0	0	0	0	0	0	0	0	0	0	0	0	0	0	0	0	0
36	41	-32.95	0	0	0	0	0	0	0	0	0	0	0	0	0	0	0	0	0	0	0	0
37	39.49	134.44	0	0	0	0	0	0	0	0	0	0	0	0	0	0	1	0	0.0625	0.242061	0	0

## Sheet: EOI400nboxes
site	lat	lon	CCSM4	CCSM4-UoT	CCSM4-Utr	CESM1.2	CESM2	COSMOS	EC-Earth3.3	GISS2.1G	HadCM3	IPSLCM6A	IPSLCM5A2	IPSLCM5A	MIROC4m	MRI2.3	NorESM-L	NorESM1-F	MMM	MM-SD
1	43.35	13.34	1	3	1	1	1	2	10	3	1	1	1	1	1	7	3	1	2.375	2.49687
2	-40.51	167.67	1	1	1	1	1	1	1	1	1	1	1	1	1	1	1	1	1	0
3	-45.52	174.95	1	1	1	1	1	1	1	1	1	1	1	1	1	1	5	1	1.25	0.968246
4	41	-32.97	1	1	1	1	1	1	1	1	1	1	1	1	1	1	1	1	1	0
5	49.88	-24.23	1	1	1	1	1	1	1	1	1	1	1	1	1	1	1	1	1	0
6	28.83	-87.16	1	1	1	1	1	6	1	1	3	1	1	1	1	1	1	1	1.4375	1.27322
7	67.23	2.93	1	1	1	1	1	1	1	1	1	1	1	1	1	1	1	1	1	0
8	-1.39	-11.74	1	1	1	1	1	1	1	1	1	1	1	1	1	1	1	1	1	0
9	1.2	-84.73	1	1	1	1	1	1	1	1	1	1	1	1	1	1	1	1	1	0
10	16.62	59.8	1	1	1	1	1	1	1	1	1	1	1	1	1	1	1	1	1	0
11	-3.1	-90.82	1	1	1	1	1	1	1	1	1	1	1	1	1	1	1	1	1	0
12	50.36	167.6	1	1	1	1	1	1	1	1	1	1	1	1	1	1	1	1	1	0
13	51.2	167.77	1	1	1	1	1	1	1	1	1	1	1	1	1	1	1	1	1	0
14	69.25	12.7	5	1	1	5	5	1	1	1	1	1	4	4	1	1	1	1	2.125	1.69097
15	78.59	3.07	1	1	1	1	1	1	1	1	1	1	1	1	1	1	1	1	1	0
16	4.2	-43.49	1	1	1	1	1	1	1	1	1	1	1	1	1	1	1	1	1	0
17	24	-20	1	1	1	1	1	1	1	1	1	1	1	1	1	1	1	1	1	0
18	36.23	-2.05	2	1	4	2	2	1	1	1	1	3	1	1	1	1	1	1	1.5	0.866025
19	57.52	-15.87	1	1	1	1	1	1	1	1	1	1	1	1	1	1	1	1	1	0
20	12.75	-78.73	1	1	1	1	1	1	1	1	1	1	1	1	1	1	1	1	1	0
21	29.97	-118.1	1	1	1	1	1	4	1	1	1	1	1	1	1	1	1	1	1.1875	0.726184
22	36.99	-123.28	3	1	1	3	3	1	1	3	1	1	3	3	5	1	2	1	2.0625	1.19733
23	28.25	-74.41	1	1	1	1	1	1	1	1	1	1	1	1	1	1	1	1	1	0
24	39.23	-72.28	1	1	1	1	1	1	1	1	1	1	1	1	1	1	2	1	1.0625	0.242061
25	-19.62	11.32	1	1	1	1	1	3	1	1	1	1	5	5	1	1	3	1	1.75	1.39194
26	-21.1	11.82	1	1	1	1	1	8	1	1	1	1	1	1	1	1	5	1	1.6875	1.89469
27	-25.52	13.03	1	1	1	1	1	1	1	1	3	1	1	1	1	1	1	1	1.125	0.484123
28	-31.47	15.32	1	1	1	1	1	4	1	1	1	1	1	1	1	1	3	1	1.3125	0.845484
29	-41.13	13.57	1	1	1	1	1	1	1	1	1	1	1	1	1	1	1	1	1	0
30	-9.19	151.57	1	1	1	1	1	11	1	1	3	1	1	1	1	1	1	1	1.75	2.4367
31	-42.55	-178.17	1	1	1	1	1	1	1	1	1	1	1	1	1	1	1	1	1	0
32	9.37	113.28	1	1	1	1	1	1	1	1	1	1	1	1	1	1	1	1	1	0
33	19.46	116.27	4	1	1	4	4	8	1	5	1	1	1	1	3	1	1	1	2.375	2.02716
34	5.85	-86.45	1	1	1	1	1	1	1	1	1	1	1	1	1	1	1	1	1	0
35	49.88	-24.24	1	1	1	1	1	1	1	1	1	1	1	1	1	1	1	1	1	0
36	41	-32.95	1	1	1	1	1	1	1	1	1	1	1	1	1	1	1	1	1	0
37	39.49	134.44	1	1	1	1	1	1	1	1	1	1	1	1	1	1	3	1	1.125	0.484123

## Sheet: E280nboxes
site	lat	lon	CCSM4	CCSM4-UoT	CCSM4-Utr	CESM1.2	CESM2	COSMOS	EC-Earth3.3	GISS2.1G	HadCM3	IPSLCM6A	IPSLCM5A2	IPSLCM5A	MIROC4m	MRI2.3	NorESM-L	NorESM1-F	MMM	MM-SD	HadISST	NOAAERSST5
1	43.35	13.34	2	1	1	2	2	3	1	3	1	1	1	1	1	7	3	1	1.9375	1.51941	1	1
2	-40.51	167.67	1	1	1	1	1	1	1	1	1	1	1	1	1	1	1	1	1	0	1	1
3	-45.52	174.95	1	1	1	1	1	1	1	1	1	1	1	1	1	1	5	1	1.25	0.968246	1	1
4	41	-32.97	1	1	1	1	1	1	1	1	1	1	1	1	1	1	1	1	1	0	1	1
5	49.88	-24.23	1	1	1	1	1	1	1	1	1	1	1	1	1	1	1	1	1	0	1	1
6	28.83	-87.16	1	1	1	1	1	1	1	1	3	1	1	1	1	1	1	1	1.125	0.484123	1	1
7	67.23	2.93	1	1	1	1	1	1	1	1	1	1	1	1	1	1	1	1	1	0	1	1
8	-1.39	-11.74	1	1	1	1	1	1	1	1	1	1	1	1	1	1	1	1	1	0	1	1
9	1.2	-84.73	1	1	1	1	1	1	1	1	1	1	1	1	1	1	1	1	1	0	1	1
10	16.62	59.8	1	1	1	1	1	1	1	1	1	1	1	1	1	1	1	1	1	0	1	1
11	-3.1	-90.82	1	1	1	1	1	1	1	1	1	1	1	1	1	1	1	1	1	0	1	1
12	50.36	167.6	1	1	1	1	1	1	1	1	1	1	1	1	1	1	1	1	1	0	1	1
13	51.2	167.77	1	1	1	1	1	1	1	1	1	1	1	1	1	1	1	1	1	0	1	1
14	69.25	12.7	1	1	1	1	1	1	1	1	1	1	4	4	1	1	1	1	1.375	0.992157	1	1
15	78.59	3.07	1	1	1	1	1	1	1	1	1	1	1	1	1	1	1	1	1	0	1	1
16	4.2	-43.49	1	1	1	1	1	1	1	1	1	1	1	1	1	1	1	1	1	0	1	1
17	24	-20	1	1	1	1	1	1	1	1	1	1	1	1	1	1	1	1	1	0	1	1
18	36.23	-2.05	2	1	1	2	2	2	3	1	1	3	1	1	1	1	1	1	1.5	0.707107	1	1
19	57.52	-15.87	1	1	1	1	1	1	1	1	1	1	1	1	1	1	1	1	1	0	1	1
20	12.75	-78.73	1	1	1	1	1	1	1	1	1	1	1	1	1	1	1	1	1	0	1	1
21	29.97	-118.1	1	1	1	1	1	1	1	1	1	1	1	1	1	1	1	1	1	0	1	1
22	36.99	-123.28	3	1	1	3	3	3	1	1	1	1	3	3	5	1	2	1	2.0625	1.19733	1	1
23	28.25	-74.41	1	1	1	1	1	1	1	1	1	1	1	1	1	1	1	1	1	0	1	1
24	39.23	-72.28	1	1	1	1	1	4	1	1	1	1	1	1	1	1	2	1	1.25	0.75	1	1
25	-19.62	11.32	1	1	1	1	1	3	1	1	1	1	5	5	1	1	3	1	1.75	1.39194	1	1
26	-21.1	11.82	1	1	1	1	1	1	1	1	1	1	1	1	1	1	5	1	1.25	0.968246	1	1
27	-25.52	13.03	1	1	1	1	1	1	1	1	3	1	1	1	1	1	1	1	1.125	0.484123	1	1
28	-31.47	15.32	1	1	1	1	1	4	1	1	1	1	1	1	1	1	3	1	1.3125	0.845484	1	1
29	-41.13	13.57	1	1	1	1	1	1	1	1	1	1	1	1	1	1	1	1	1	0	1	1
30	-9.19	151.57	1	1	1	1	1	1	1	1	1	1	1	1	1	1	1	1	1	0	1	1
31	-42.55	-178.17	1	1	1	1	1	1	1	1	1	1	1	1	1	1	1	1	1	0	1	1
32	9.37	113.28	1	1	1	1	1	1	1	1	1	1	1	1	1	1	1	1	1	0	1	1
33	19.46	116.27	1	1	1	1	1	1	1	1	1	1	1	1	1	1	1	1	1	0	1	1
34	5.85	-86.45	1	1	1	1	1	1	1	1	1	1	1	1	1	1	1	1	1	0	1	1
35	49.88	-24.24	1	1	1	1	1	1	1	1	1	1	1	1	1	1	1	1	1	0	1	1
36	41	-32.95	1	1	1	1	1	1	1	1	1	1	1	1	1	1	1	1	1	0	1	1
37	39.49	134.44	1	1	1	1	1	1	1	1	1	1	1	1	1	1	3	1	1.125	0.484123	1	1
