# Supplementary material for: The Pliocene Model Intercomparison Project Phase 2: large-scale climate features and climate sensitivity
Source: Copernicus journal article supplement (doi:10.5194/cp-16-2095-2020), 2020-11-04
Supplement: Supplementary file 2 [file cp-16-2095-2020-supplement.zip › Supplementary/figure9.txt]

lon	lat	est_ECS
-87.16	28.83	3.75
-11.74	-1.39	3.78
-84.73	1.2	3.9
59.8	16.62	3.22
-90.82	-3.1	3.96
-43.49	4.2	3.33
-20.0	24.0	4.08
-78.73	12.75	2.63
-123.28	36.99	3.45
15.32	-31.47	4.8
151.57	-9.19	3.12
116.27	19.46	4.07
-86.45	5.85	2.72
