# Supplementary material for: The Pliocene Model Intercomparison Project Phase 2: large-scale climate features and climate sensitivity
Source: Copernicus journal article supplement (doi:10.5194/cp-16-2095-2020), 2020-11-04
Supplement: Supplementary file 2 [file cp-16-2095-2020-supplement.zip › Supplementary/supplementary_figures.pdf]

# 1 Supplementary Figures

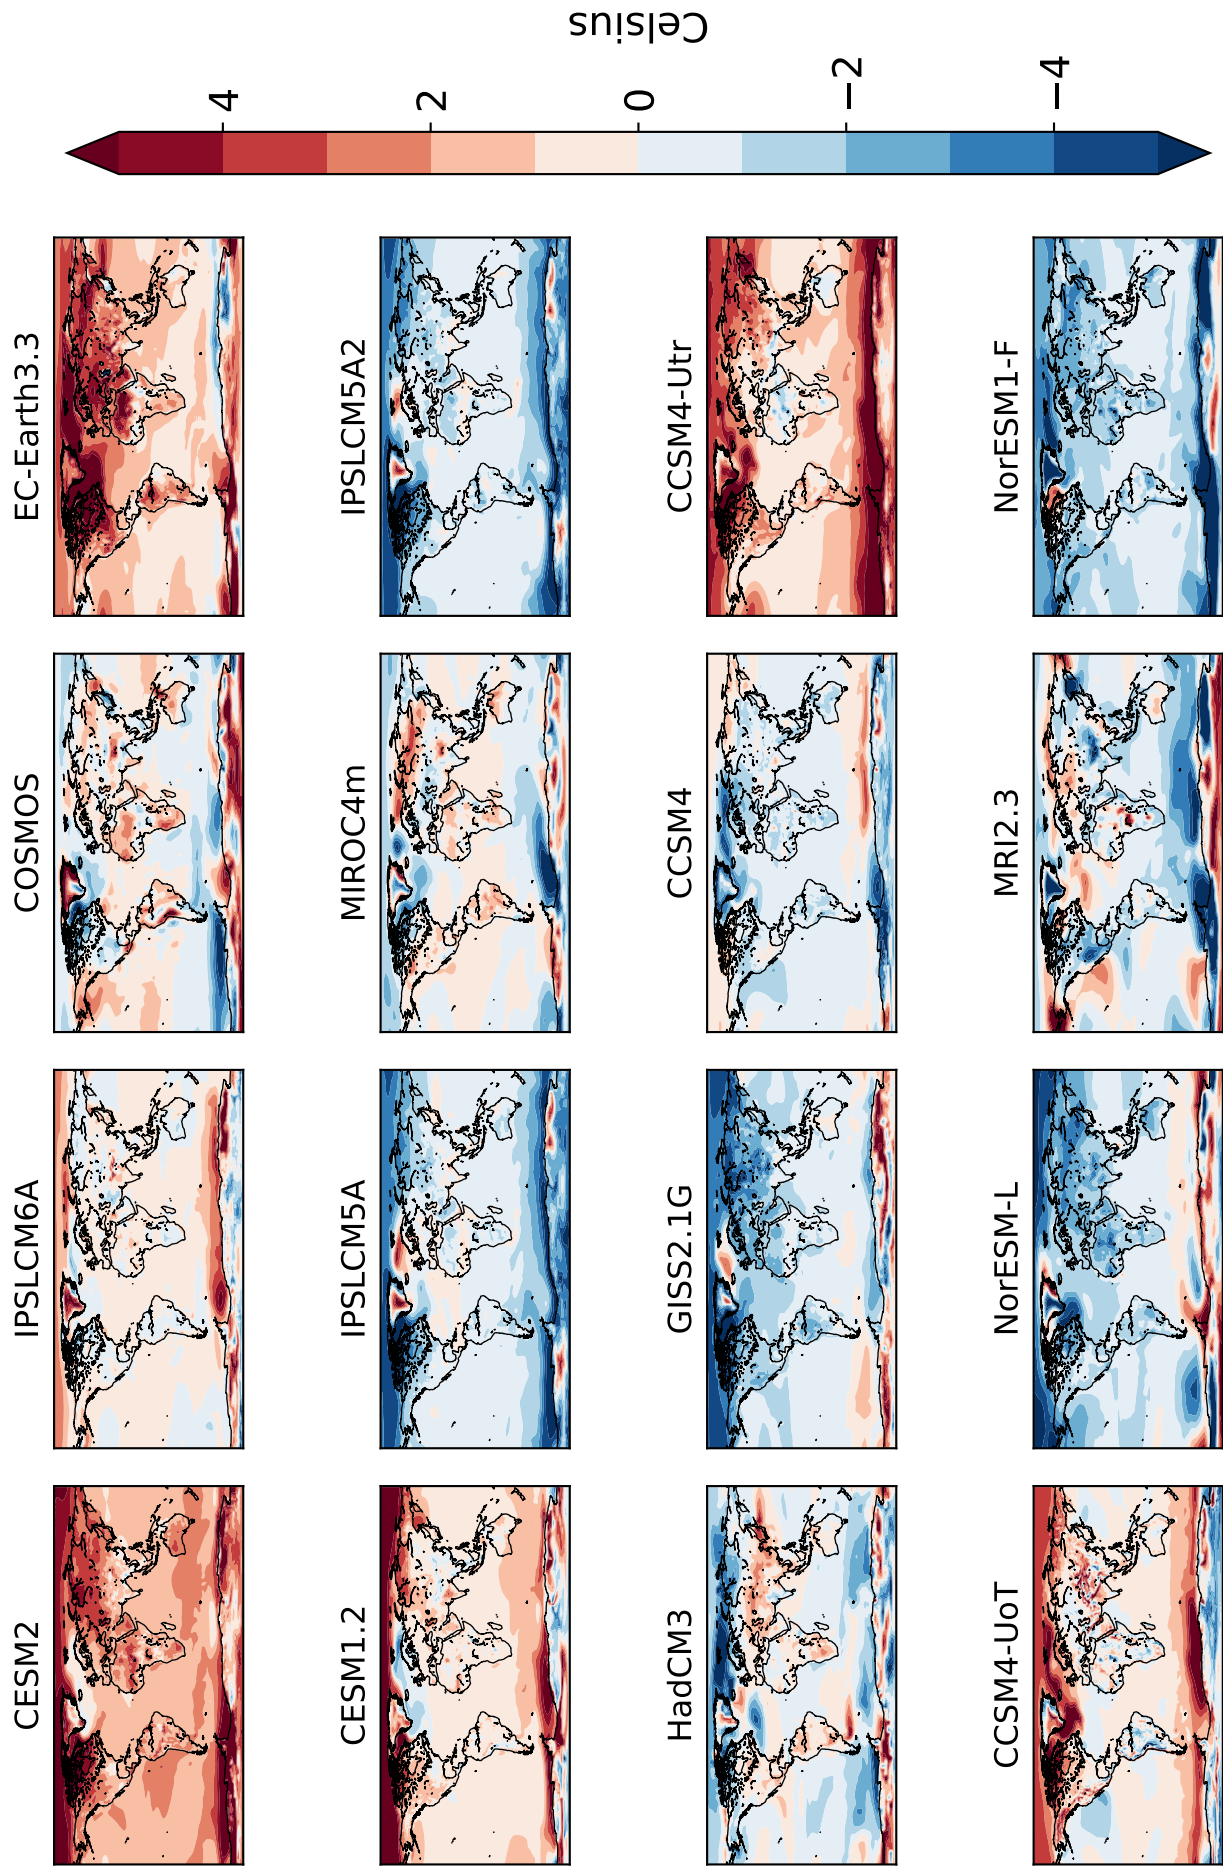

Figure 1: Near Surface Air Temperature anomaly ( $P_{I_{Core}} - P_{I_{Ctrl}}$ ) from each model minus the multimodel mean Near Surface Air Temperature anomaly

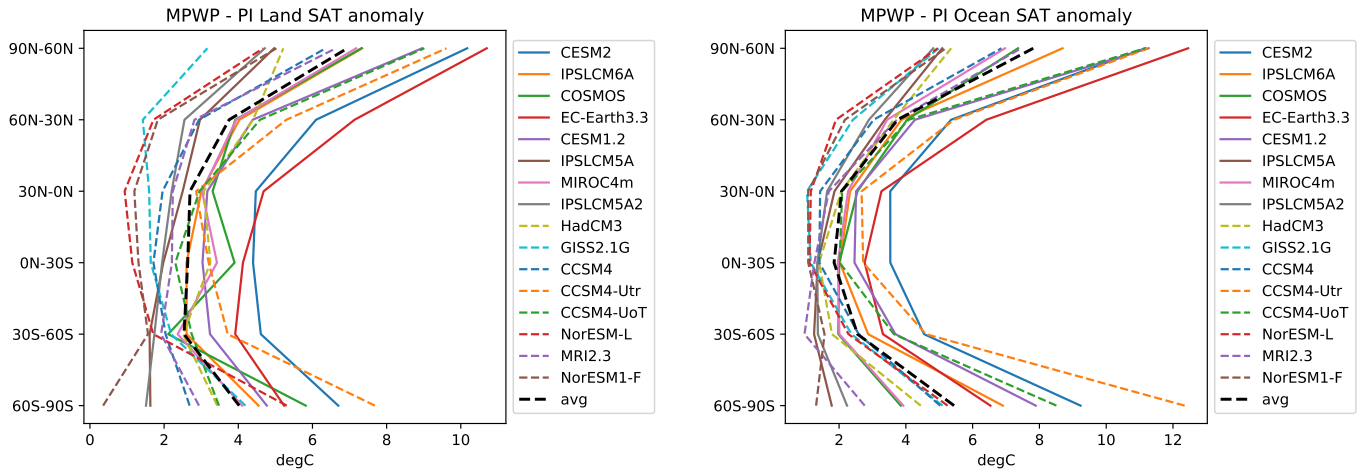

Figure 2: The average temperature anomaly for each model at different latitude bands over the land (left) and the ocean (right)

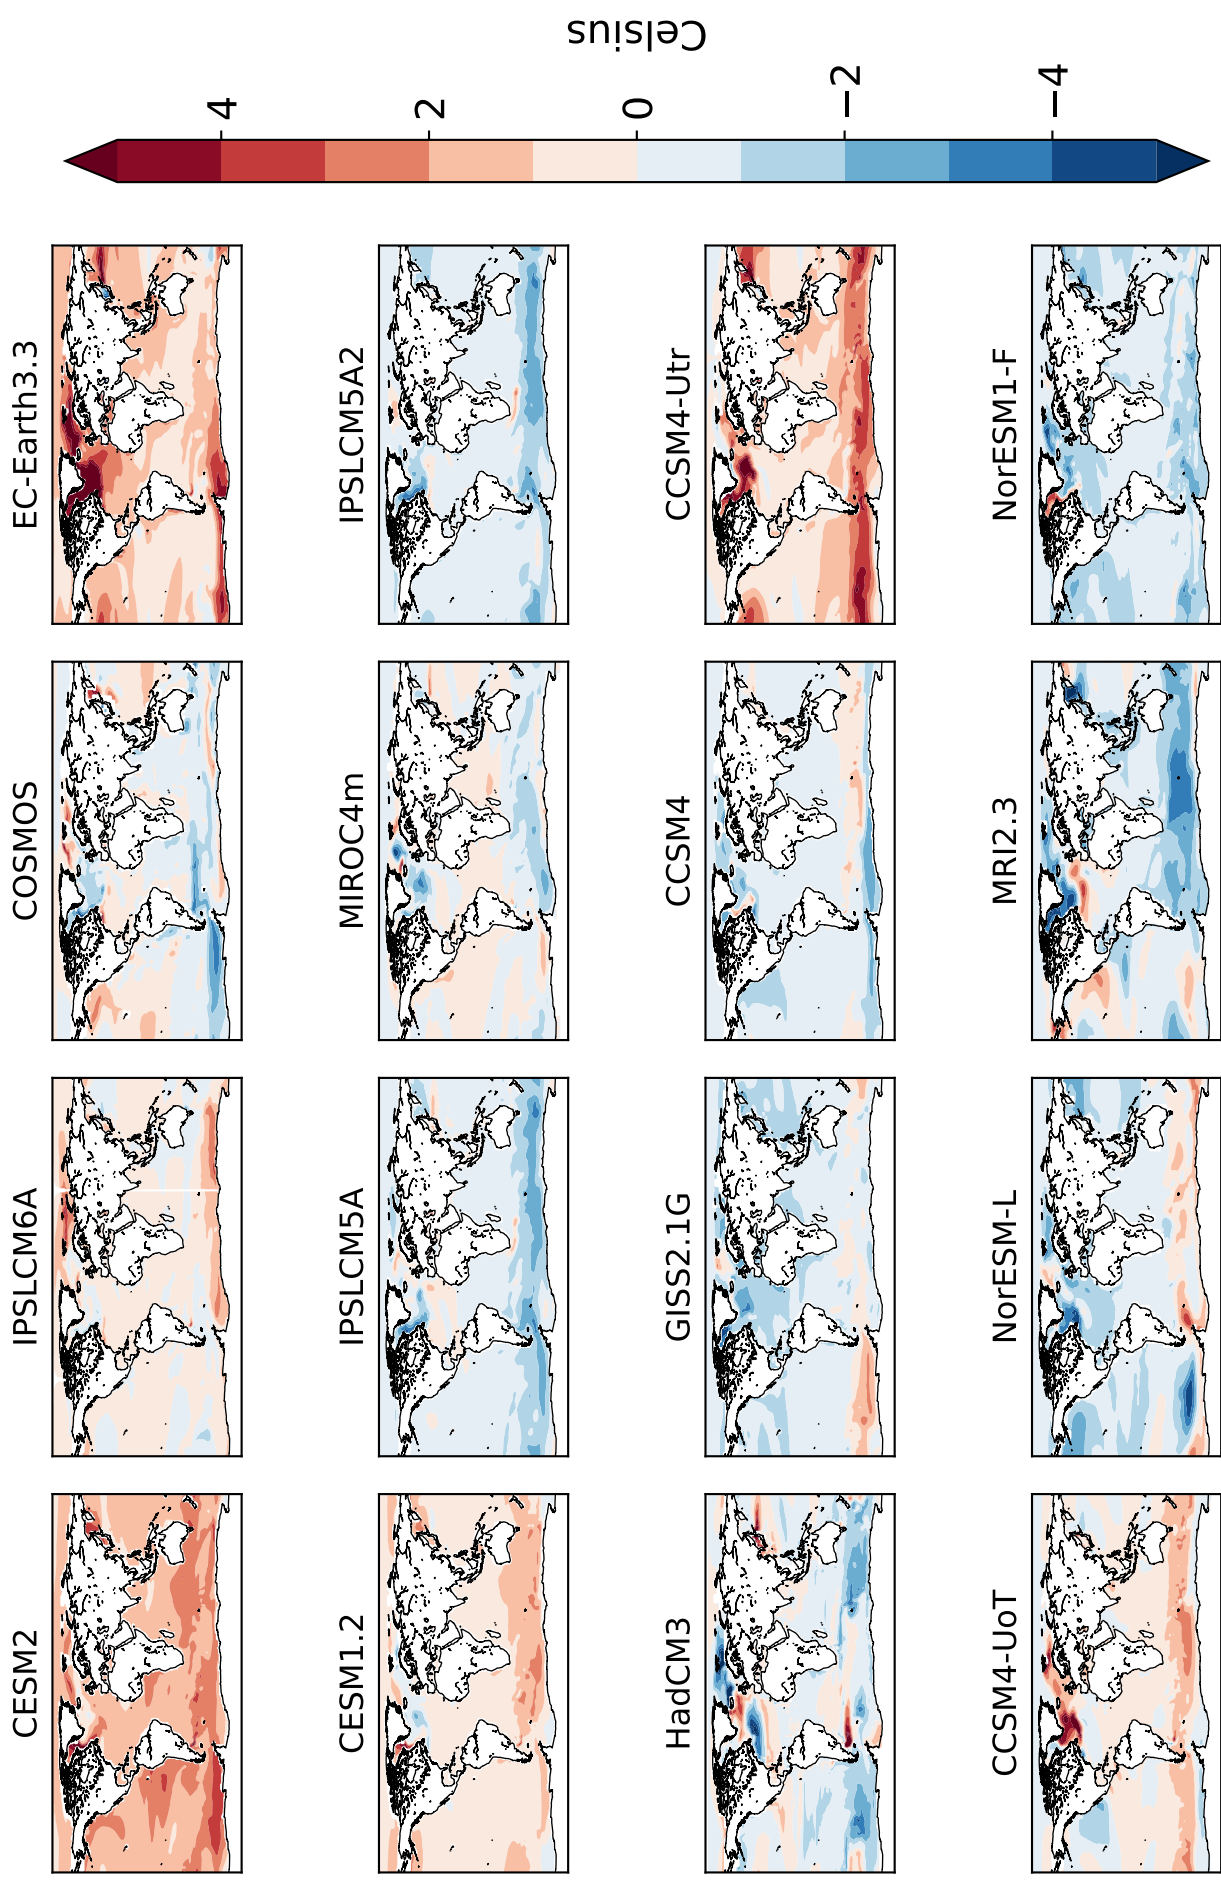

Figure 3: SST anomaly ( $Plio_{Core} - Pli_{C_{trl}}$ ) from each model minus the multimodel mean SST anomaly

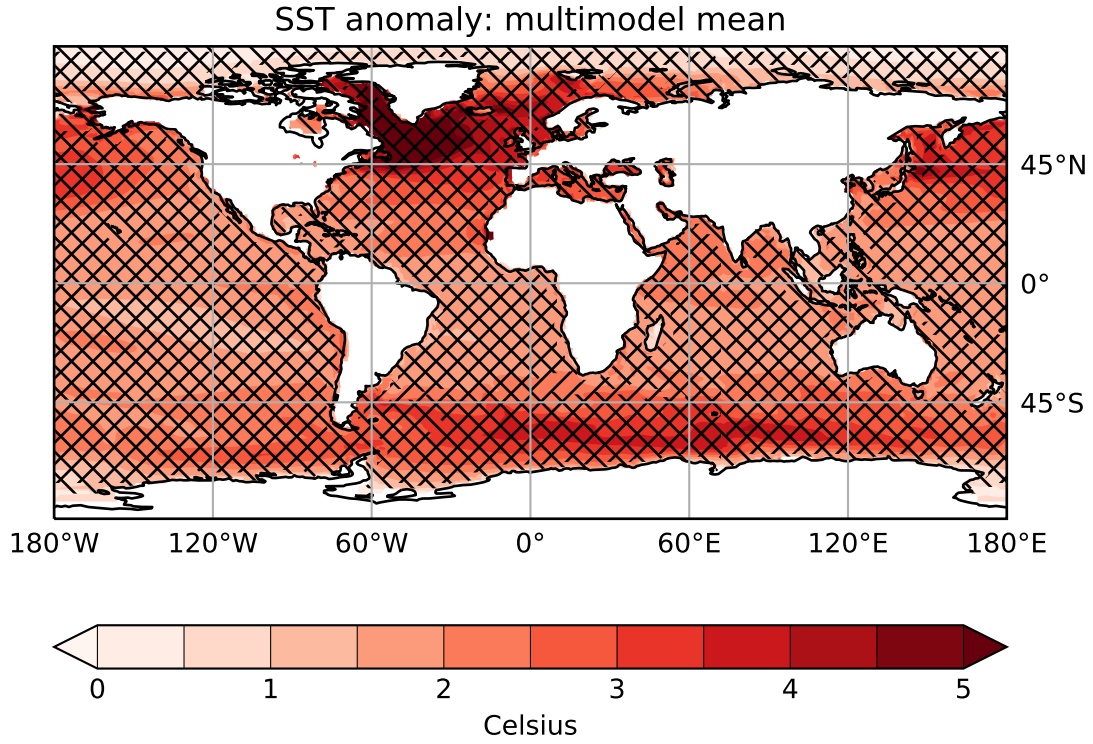

Figure 4: Multimodel mean ( $Plio_{Core} - PI_{Ctrl}$ ) SST anomalies (colours). Regions which have at least 80% of the models agreeing on the sign of the change are marked '/'. Regions which have the ratio of the multimodel mean SST change to the  $PI_{Ctrl}$  intermodel standard deviation greater than 1 are marked '\'. Regions which fulfil both these conditions are defined as being 'robust' across the ensemble.

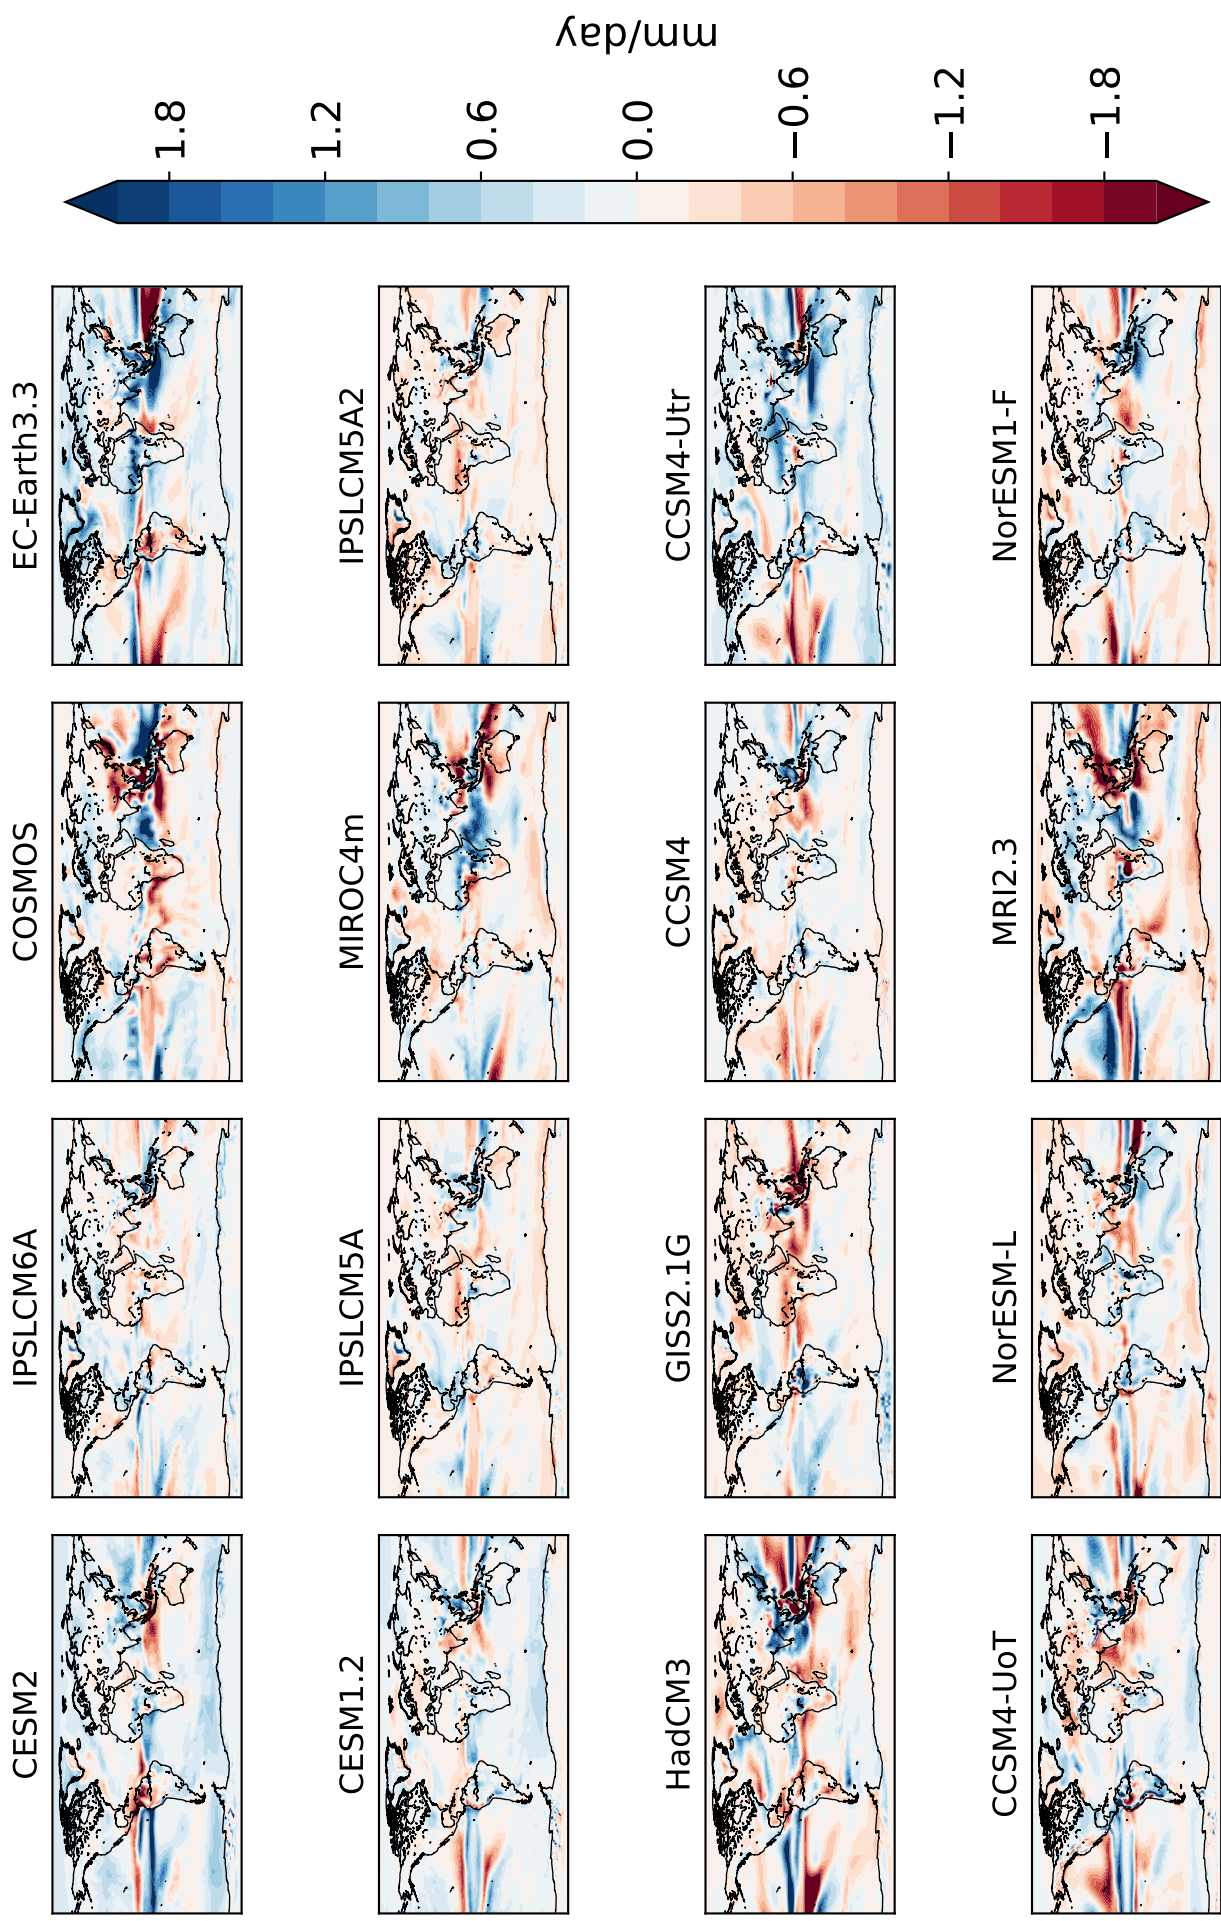

Figure 5: Precipitation anomaly ( $P_{I_{Core}} - P_{I_{Ctrl}}$ ) from each model minus the multimodel mean Precipitation anomaly

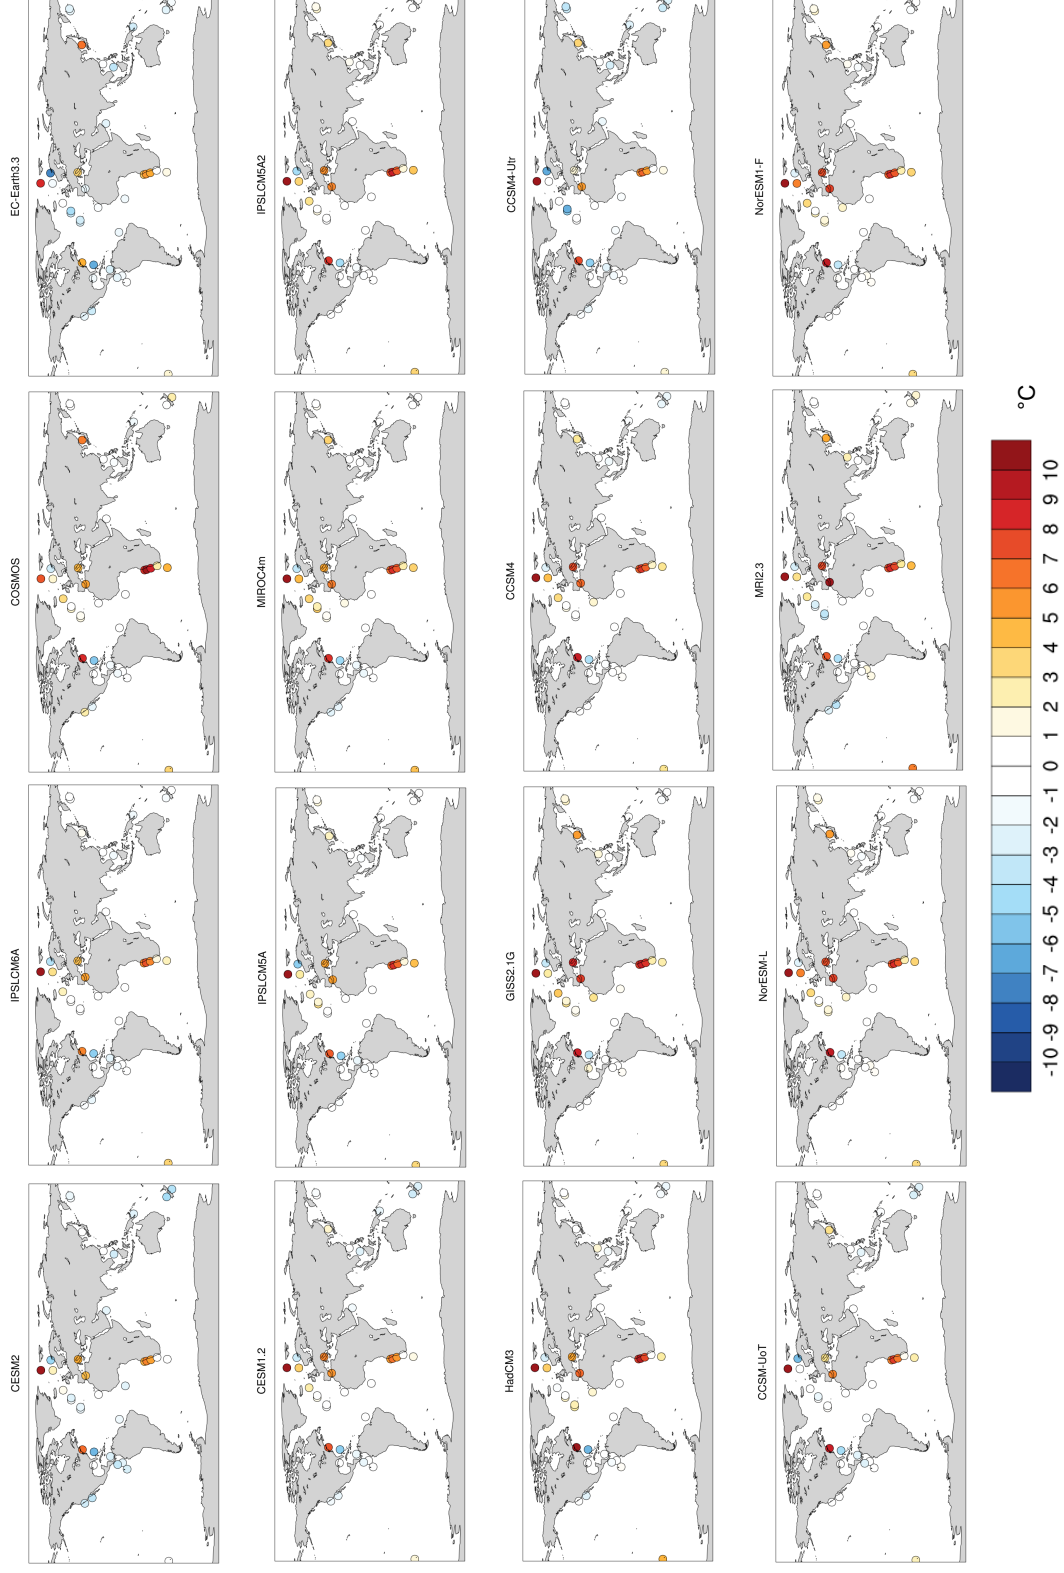

Figure 6: The difference between the SST anomaly derived from the each model and the SST anomaly obtained from the data (PRISM4 - NOAA ERSSTv5)

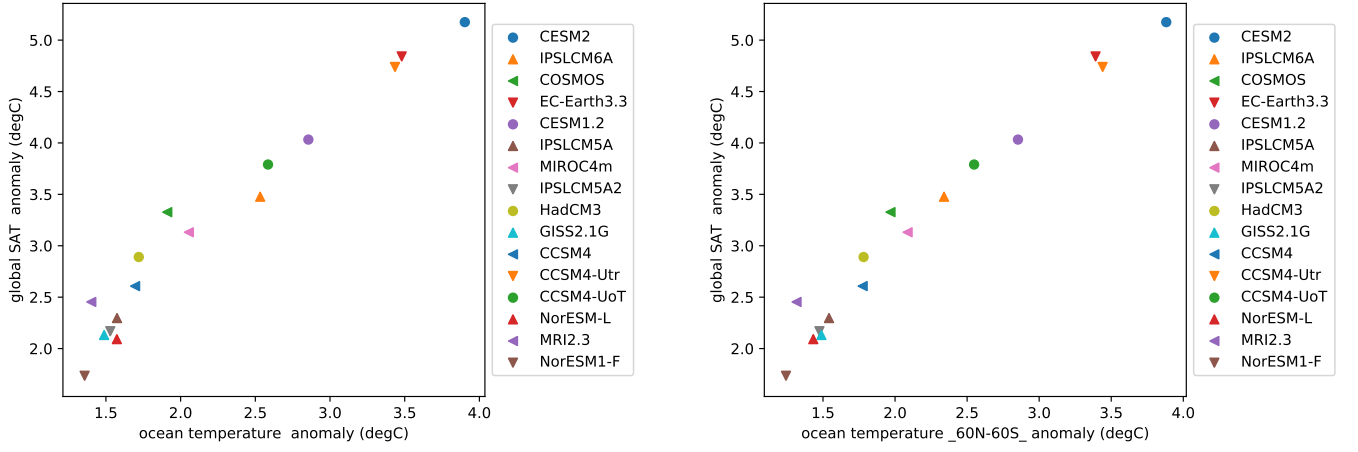

Figure 7: The relationship between the global mean ( $Plio_{Core} - PI_{Ctrl}$ ) SAT anomaly and the ( $Plio_{Core} - PI_{Ctrl}$ ) SST anomaly. Left: the SST anomaly was calculated over the whole ocean and the regression equation is  $SAT_{anom} = (1.18 \times SSTA) + 0.66$ , with  $R_{sq} = 0.97$ . Right: the SSTA was calculated over 60°N - 60° S, and the regression equation is  $SAT_{anom} = (1.16 \times OTA) + 0.74$ , with  $R_{sq}=0.97$ .

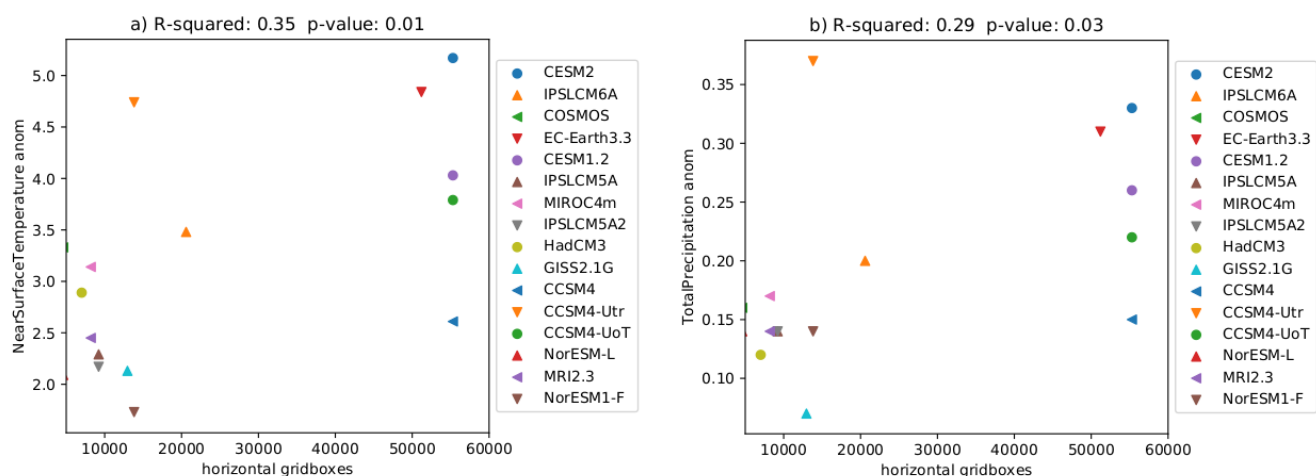

Figure 8: a) the correlation between the  $Plio_{Core} - PI_{Ctrl}$  SAT anomaly and the number of atmospheric gridboxes. (b) as (a) but for precipitation

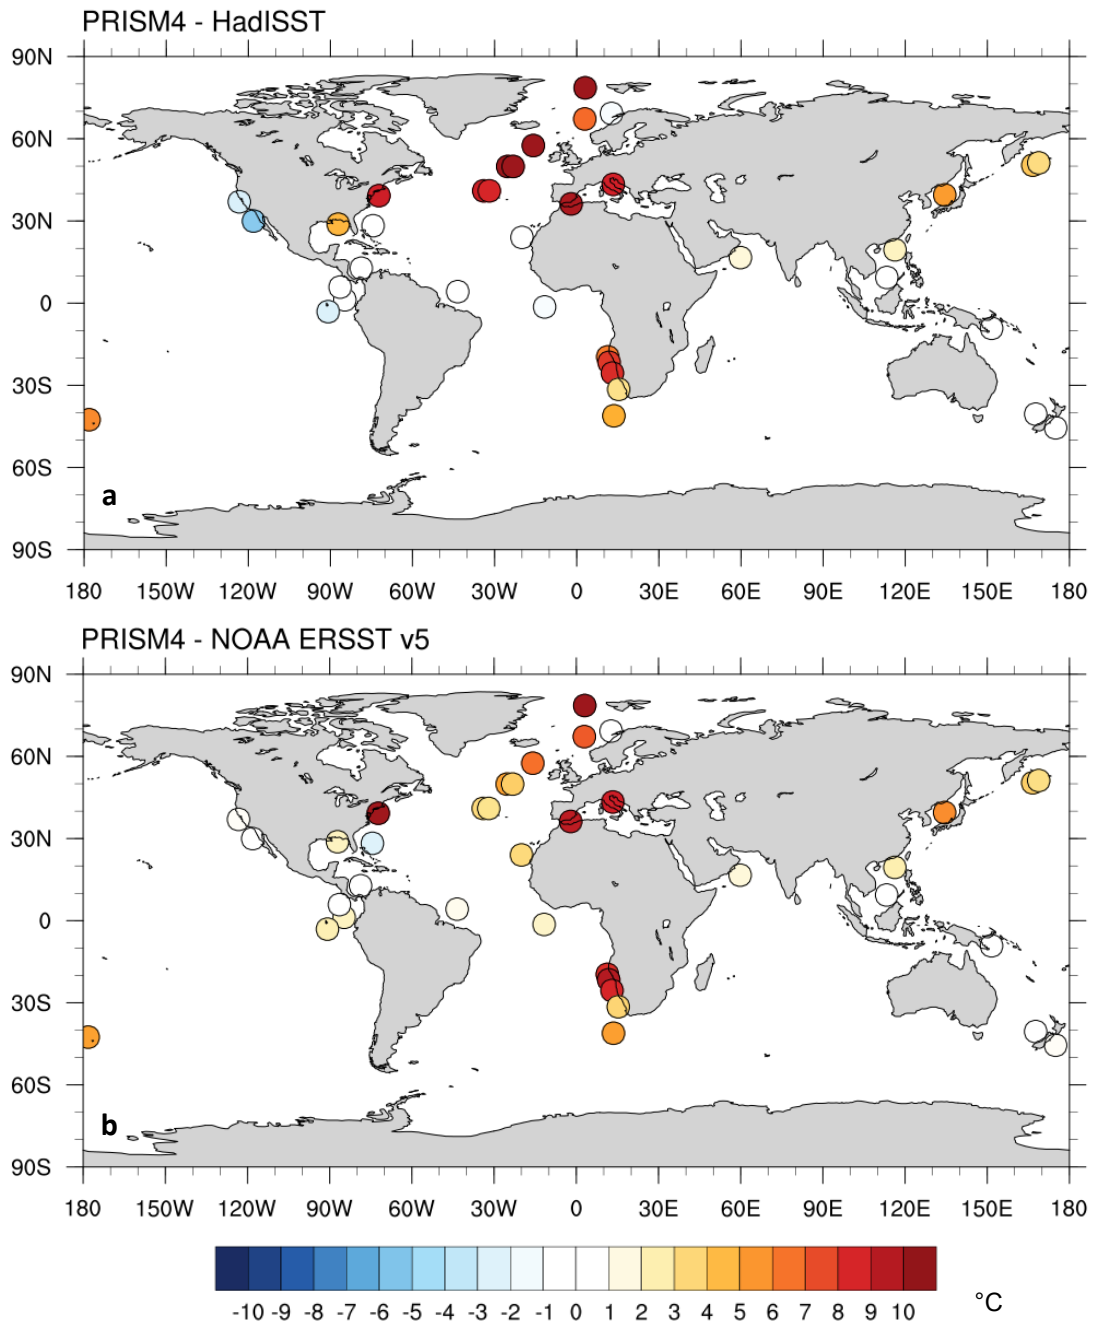

Figure 9: SST anomaly from the data using preindustrial SST from different sources. Top Panel: PRISM4 SST - HadISST. Lower Panel: PRISM4 SST - NOAA ERSSTv5

Table 1: Initial conditions and spin up. (Note the Near Surface Air Temperature anomaly drift was calculated over the final 100 years of each simulation)

| Model name  | initial ocean temperature                                                                                           | Run length<br>years | net TOA radiation<br>$\text{W/m}^2$ | NSAT anomaly drift<br>$^{\circ}\text{C} / 100 \text{ years}$ |
|-------------|---------------------------------------------------------------------------------------------------------------------|---------------------|-------------------------------------|--------------------------------------------------------------|
| CCSM4       | warm start with<br>blended PRISM3D and CCSM4 PlioMIP1                                                               | 1000                | 0.04                                | -0.05                                                        |
| CCSM4-UoT   | Levitus                                                                                                             | 2820                | 0.1                                 | 0.04                                                         |
| CCSM4-Utr   | horizontally homogeneous<br>15°C top - 4°C bottom<br>(tanh function)<br>(globally averaged 3°C above preindustrial) | 2000                | -0.07                               | 0.02                                                         |
| CESM1.2     | warm start<br>blended PRISM3D and CCSM4 PlioMIP1                                                                    | 1200                | 0.17                                | -0.07                                                        |
| CESM2       | PRISM3D                                                                                                             | 1200                | 0.2                                 | -0.1                                                         |
| COSMOS      | Levitus                                                                                                             | 2000                | 1.89<br>(diff from PI = +0.16)      | -0.1                                                         |
| EC-Earth3.3 | Levitus<br>SST average 18.4°C                                                                                       | 1400                | 0.67                                | -0.03                                                        |
| GISS2.1G    | Levitus                                                                                                             | 1250                | 038                                 | 0.18                                                         |
| HadCM3      | zonally-averaged 3D temperatures<br>from a preindustrial simulation                                                 | 2500                | 0.05                                | 0.08                                                         |
| IPS�CM6A    | preindustrial                                                                                                       | 1450                | 0.91                                | 0.4                                                          |
| IPS�CM5A2.1 | End of PlioMIP1 expt 2                                                                                              | 1500                | 0.43                                | -0.09                                                        |
| IPS�CM5A    | End of PlioMIP1 expt 2                                                                                              | 800                 | 0.69                                | -0.15                                                        |
| MIROC4m     | preindustrial                                                                                                       | 4000                | 0.84                                | 0.08                                                         |
| MRI-CGCM2.3 | present day                                                                                                         | 1000                | 2.69<br>(diff from PI = -0.17)      | 0.18                                                         |
| NorESM1-F   | end of 2000 year 400ppmv CO <sub>2</sub> simulation                                                                 | 500                 | -0.01                               | 0.04                                                         |
| NorESM-L    | end of PlioMIP1                                                                                                     | 1200                | 0.10                                | 0.13                                                         |
